# Supplementary material for: Codon Usage Provide Insights into the Adaptation of Rice Genes under Stress Condition
Source: Int J Mol Sci. 2023 Jan 6;24(2):1098. doi: 10.3390/ijms24021098 (PMC9861248; doi:10.3390/ijms24021098)
Supplement: Supplementary file 1 [file ijms-24-01098-s001.zip]

Archive with 10 entries (10 files):
- Figure S1.jpg
- Figure S2.jpg
- Supplementary Table S4(biotic).xlsx
- Supplementary Table S5(abiotic).xlsx
- Supplementary Table S6(biotic).xlsx
- Supplementary Table S7.xlsx
- Supplementary_information_CUB.pdf
- Supplemnetary Table S1.xlsx
- Supplemnetary Table S2.xlsx
- Supplemnetary Table S3.xlsx
