# Supplementary material for: Codon Usage Provide Insights into the Adaptation of Rice Genes under Stress Condition
Source: Int J Mol Sci. 2023 Jan 6;24(2):1098. doi: 10.3390/ijms24021098 (PMC9861248; doi:10.3390/ijms24021098)
Supplement: Supplementary file 1 [file ijms-24-01098-s001.zip › Supplementary Table S4(biotic).xlsx]

## Sheet: Biotic
Supplementary Table S4. Sorting, function predication of differentially expressed genes under biotic stress condition.
Upregulated genes
Locus_id	RAP-ID	Log2fold expression	Chr	Start	End	Description
LOC_Os01g02020	Os01g0110400	1.14316	chr01	549157	552574	Similar to Acetyl-CoA C-acetyltransferase. (Os01t0110400-01)
LOC_Os01g02930	Os01g0119000	1.00044	chr01	1078565	1081597	Glycosyltransferase AER61, uncharacterized domain containing protein. (Os01t0119000-01);Glycosyltransferase AER61, uncharacterized domain containing protein. (Os01t0119000-02)
LOC_Os01g03330	Os01g0124100	1.08136	chr01	1345118	1346047	Proteinase inhibitor I12, Bowman-Birk family protein. (Os01t0124100-01)
LOC_Os01g03360	Os01g0124401	1.85864	chr01	1353705	1354767	Bowman-Birk inhibitor, Defense response (Os01t0124401-01)
LOC_Os01g03720	Os01g0128000	2.13695	chr01	1549241	1551011	Myb transcription factor domain containing protein. (Os01t0128000-01)
LOC_Os01g03730	Os01g0128200	1.17512	chr01	1566147	1569467	Similar to Nuclease I. (Os01t0128200-01)
LOC_Os01g04050	Os01g0132000	1.03665	chr01	1760310	1761065	Similar to Wound-induced protease inhibitor (WIP1). (Os01t0132000-01)
LOC_Os01g04330	Os01g0135700	1.23509	chr01	1931016	1931904	Calmodulin-like protein, Calcium signalling during abiotic stress, Promotion of root growth and drought tolerance (Os01t0135700-01)
LOC_Os01g04360	Os01g0136000	1.88482	chr01	1944276	1944948	16.9 kDa small heat shock protein (Os01t0136000-01)
LOC_Os01g04370	Os01g0136100	1.05904	chr01	1948773	1949587	16.9 kDa class I small heat shock protein (Os01t0136100-01)
LOC_Os01g06220	Os01g0155000	1.10767	chr01	2957166	2958439	Alpha/beta hydrolase fold-3 domain containing protein. (Os01t0155000-02)
LOC_Os01g06560	Os01g0159000	1.56825	chr01	3091435	3092698	Similar to cDNA clone:J023049H21, full insert sequence. (Os01t0159000-01)
LOC_Os01g06740	Os01g0160800	3.09559	chr01	3189117	3190330	Ribosome-inactivating protein, Defense against herbivorous insects (Os01t0160800-01)
LOC_Os01g08110	Os01g0176200	1.18956	chr01	3924401	3926323	UDP-glucuronosyl/UDP-glucosyltransferase family protein. (Os01t0176200-01);UDP-glucuronosyl/UDP-glucosyltransferase family protein. (Os01t0176200-02)
LOC_Os01g08860	Os01g0184100	1.41335	chr01	4449070	4449876	Class II small heat shock protein, Positive regulation in both Xoo resistance and heat/salt tolerance (Os01t0184100-01)
LOC_Os01g09100	Os01g0186000	1.10166	chr01	4572446	4573421	WRKY transcription factor 10, Negative regulation of thermotolerance (Os01t0186000-01)
LOC_Os01g09700	Os01g0192900	2.27212	chr01	5002454	5004321	1-aminocyclopropane-1-carboxylic acid synthase, Submergence response (Os01t0192900-01)
LOC_Os01g11150	Os01g0209700	1.42144	chr01	5968819	5972489	Similar to GA 2-oxidase 5. (Os01t0209700-01)
LOC_Os01g12430	Os01g0224000	2.1522	chr01	6790903	6793320	S-Domain receptor like kinase-48, Response to drought and chilling in tolerant genotypes (Os01t0224000-00)
LOC_Os01g12520	Os01g0225000	1.27477	chr01	6879860	6881980	Mitochondrial carrier protein domain containing protein. (Os01t0225000-00)
LOC_Os01g12580	Os01g0225600	1.62661	chr01	6922127	6922762	Atypical 5C LEA (late embryogenesis abundant) protein, Multiple stress tolerance, Hg accumulation (Os01t0225600-01)
LOC_Os01g12660	Os01g0226400	1.03901	chr01	6970912	6976706	ATPase, AAA-type, core domain containing protein. (Os01t0226400-01)
LOC_Os01g12820	Os01g0228500	3.14729	chr01	7095864	7097381	Harpin-induced 1 domain containing protein. (Os01t0228500-01)
LOC_Os01g15340	Os01g0257300	1.68921	chr01	8586157	8586941	GTP-binding protein, Homolog of AtFPF1 (Flowering Promoting Factor 1), Cell cycle regulator during root development, Regulation of root architecture and flowering (Os01t0257300-01)
LOC_Os01g16450	Os01g0270300	1.19691	chr01	9339815	9342240	Similar to Cationic peroxidase isozyme 40K precursor. (Os01t0270300-01);Similar to Cationic peroxidase isozyme 40K precursor. (Os01t0270300-02)
LOC_Os01g16920	Os01g0276300	1.90624	chr01	9679828	9680883	Similar to Group 3 late embryogenesis abundant protein (Fragment). (Os01t0276300-01)
LOC_Os01g20206	Os01g0307686	1.98854	chr01	11505079	11506118	Similar to embryonic abundant protein-like. (Os01t0307686-00)
LOC_Os01g22570	Os01g0329000	2.03405	chr01	12677044	12683455	Phospholipid/glycerol acyltransferase domain containing protein. (Os01t0329000-01)
LOC_Os01g24710	Os01g0348900	1.34095	chr01	13903285	13904626	Jacalin-related mannose-binding lectin, Salinity tolerance, Resistance to M. oryzae (Os01t0348900-01)
LOC_Os01g24820	Os01g0350300	1.77636	chr01	13980666	13983744	Disease resistance protein domain containing protein. (Os01t0350300-00)
LOC_Os01g27340	Os01g0370900	1.62127	chr01	15258848	15260219	Similar to Glutathione transferase. (Os01t0370900-00)
LOC_Os01g28840	Os01g0385400	1.48299	chr01	16151562	16154044	C4-dicarboxylate transporter/malic acid transport protein family protein. (Os01t0385400-01);Similar to C4-dicarboxylate transporter/malic acid transport protein. (Os01t0385400-02)
LOC_Os01g28970	Os01g0386500	3.2768	chr01	16224955	16226730	Conserved hypothetical protein. (Os01t0386500-01)
LOC_Os01g31370	Os01g0498300	2.24617	chr01	17159733	17161535	Glycosyltransferase AER61, uncharacterized domain containing protein. (Os01t0498300-01)
LOC_Os01g32780	Os01g0511100	1.58532	chr01	17990846	17993750	Universal stress protein, Response to M. oryzae attack (Os01t0511100-01)
LOC_Os01g36790	Os01g0548600,Os01g0548750	2.39981	#N/A	#N/A	#N/A	#N/A
LOC_Os01g37200	None	1.82073	#N/A	#N/A	#N/A	#N/A
LOC_Os01g37750	Os01g0558100	1.57836	chr01	21114757	21115731	Similar to Glutathione S-transferase TSI-1 (EC 2.5.1.18) (Glutathione S- transferase 1). (Os01t0558100-01)
LOC_Os01g37810	Os01g0558700	1.7219	chr01	21150419	21151079	Conserved hypothetical protein. (Os01t0558700-01)
LOC_Os01g38580	Os01g0566500	1.23595	chr01	21665759	21668304	Similar to Dioxygenase RAMOSUS1. (Os01t0566500-01)
LOC_Os01g39136	None	2.19104	#N/A	#N/A	#N/A	#N/A
LOC_Os01g40190	Os01g0584100	1.15448	chr01	22677778	22678619	Similar to hydroxyproline-rich glycoprotein family protein. (Os01t0584100-01)
LOC_Os01g40280	Os01g0585100	1.5217	chr01	22742545	22747123	Similar to Integral membrane protein. (Os01t0585100-01)
LOC_Os01g41430	Os01g0597800	2.12362	chr01	23456074	23458035	UDP-glucuronosyl/UDP-glucosyltransferase family protein. (Os01t0597800-01)
LOC_Os01g42380	Os01g0609300	1.06683	chr01	24075070	24082181	PDR-type ABC transporter 9 (Os01t0609300-01);Hypothetical conserved gene. (Os01t0609300-02)
LOC_Os01g42410	Os01g0609900	1.43817	chr01	24107086	24115287	Similar to Pleiotropic drug resistance protein 4. (Os01t0609900-01);Similar to PDR-like ABC transporter (PDR4 ABC transporter). (Os01t0609900-02)
LOC_Os01g42790	Os01g0613800	1.45322	chr01	24351308	24353345	Peptidase C1A, papain family protein. (Os01t0613800-01)
LOC_Os01g42860	Os01g0615100	3.84486	chr01	24392841	24393423	Chymotrypsin protease inhibitor, Salt and osmotic stress tolerance (Os01t0615100-01)
LOC_Os01g45640	Os01g0644000	1.98314	chr01	25926370	25928206	Twin-arginine translocation pathway signal domain containing protein. (Os01t0644000-01);Twin-arginine translocation pathway signal domain containing protein. (Os01t0644000-02)
LOC_Os01g46570	Os01g0654100	1.59562	chr01	26514543	26521761	Similar to CTP synthase (EC 6.3.4.2) (UTP--ammonia ligase) (CTP synthetase). (Os01t0654100-01);CTP synthase domain containing protein. (Os01t0654100-02);Similar to CTP synthase. (Os01t0654100-03)
LOC_Os01g47290	Os01g0661750	2.14449	chr01	27032052	27032405	Hypothetical conserved gene. (Os01t0661750-00)
LOC_Os01g47300	None	1.48796	#N/A	#N/A	#N/A	#N/A
LOC_Os01g48000	Os01g0670100	2.00083	chr01	27474092	27476781	S-Domain receptor like kinase-13, Response to drought in tolerant genotypes, Response to submergence, Response to Xanthomonas oryzae pv. oryzae and R. solani infection in susceptible genotypes (Os01t0670100-01)
LOC_Os01g48446	Os01g0675800	1.22021	chr01	27780948	27782265	"NAM, ATAF1-2, and CUC2 (NAC) transcription factor", Drought tolerance (Os01t0675800-01)
LOC_Os01g49430	Os01g0688900	2.49197	chr01	28425816	28427634	Similar to HSP70B (heat shock protein 70B); ATP binding. (Os01t0688900-00)
LOC_Os01g50400	Os01g0699400	2.38455	chr01	28933836	28935191	Serine/threonine protein kinase domain containing protein. (Os01t0699400-01)
LOC_Os01g50410	Os01g0699500	2.78423	chr01	28938971	28941009	Serine/threonine protein kinase domain containing protein. (Os01t0699500-01);Mitogen Activated Protein Kinase Kinase Kinase, Regulation of grain size and leaf angle, Positive regulation of brassinosteroid responses (Os01t0699500-02)
LOC_Os01g50910	Os01g0705200	1.57161	chr01	29233040	29234256	Late embryogenesis abundant protein repeat containing protein. (Os01t0705200-01)
LOC_Os01g51690	Os01g0714800	2.96533	chr01	29720923	29723065	WRKY transcription factor 26. (Os01t0714800-01)
LOC_Os01g52070	Os01g0718700	2.04799	chr01	29944091	29948109	Similar to predicted protein. (Os01t0718700-00)
LOC_Os01g52610	Os01g0725400	1.63098	chr01	30241954	30251103	Uncharacterised protein family UPF0497, trans-membrane plant subgroup domain containing protein. (Os01t0725400-01)
LOC_Os01g52730	Os01g0727500	3.55925	chr01	30322749	30325083	A member of S40 gene family, Leaf senescence (Os01t0727500-02)
LOC_Os01g53260	Os01g0734000	1.39589	chr01	30604326	30608077	Similar to WRKY DNA binding protein. (Os01t0734000-01)
LOC_Os01g54030	Os01g0743500	3.38342	chr01	31076571	31081251	Cytosolic NADP malic enzyme (Os01t0743500-01)
LOC_Os01g55340	Os01g0758200	2.89383	chr01	31850541	31851617	Similar to Dof2 (Fragment). (Os01t0758200-01)
LOC_Os01g55940	Os01g0764800	1.61037	chr01	32221378	32225121	Indole-3-acetic acid (IAA)-amido synthetase, Disease resistance, Abiotic stress tolerance, Negative regulation of seed storability (Os01t0764800-01)
LOC_Os01g56570	Os01g0772500	3.36009	chr01	32611416	32613138	Glycosyl transferase, family 14 protein. (Os01t0772500-01)
LOC_Os01g57230	Os01g0780600	3.14191	chr01	33064726	33067834	Similar to Transposon protein Mutator sub-class. (Os01t0780600-01)
LOC_Os01g58960	Os01g0803800	1.66229	chr01	34084757	34086514	Cytochrome P450 of the CYP94 subfamily (Os01t0803800-01)
LOC_Os01g59100	Os01g0805400	1.15794	chr01	34141778	34145201	Cytokinin glycosyltransferase (Os01t0805400-01)
LOC_Os01g60020	Os01g0816100	2.01141	chr01	34692912	34694391	Plant-specific transcription factor, Regulation of hypersensitive response (HR) cell death (Os01t0816100-01)
LOC_Os01g62190	Os01g0839100	1.72247	chr01	36001242	36002101	Cys2/His2-type zinc finger protein, Salt tolerance (Os01t0839100-01)
LOC_Os01g62610	Os01g0844300	1.09821	chr01	36253547	36256956	FK506-binding protein, Immunophilin family protein, Mediation of RNA processing, Post-transcriptional regulation of abiotic stress response (Os01t0844300-01)
LOC_Os01g63980	Os01g0859100	1.23345	chr01	37146919	37149119	Similar to WIP1 protein (Fragment). (Os01t0859100-01)
LOC_Os01g64000	Os01g0859300	2.79457	chr01	37174575	37176344	bZIP transcription factor, Stress response and ABA signal transduction, Regulation of plant fertility (Os01t0859300-01);bZIP transcription factor, Stress response and ABA signal transduction, Regulation of plant fertility (Os01t0859300-02)
LOC_Os01g64310	Os01g0862800	1.06503	chr01	37334397	37336207	NAC (NAM ATAF1/2 CUC2) transcription factor, Early and transient regulator of abiotic stress responses (Os01t0862800-01)
LOC_Os01g64360	Os01g0863300	1.65179	chr01	37358205	37359556	Similar to MCB2 protein. (Os01t0863300-01)
LOC_Os01g64790	Os01g0868000	1.40733	chr01	37590034	37592446	AP2/ERF transcription factor, Abiotic stress response, Salt stress response (Os01t0868000-01)
LOC_Os01g66250	Os01g0885700	2.20527	chr01	38481235	38484005	S-Domain receptor like kinase-17, Response to drought and chilling stress in tolerant rice genotypes (Os01t0885700-01)
LOC_Os01g71820	Os01g0946600	1.28382	chr01	41597358	41598689	Conserved hypothetical protein. (Os01t0946600-01)
LOC_Os01g71830	Os01g0946700	3.51891	chr01	41603305	41604652	Similar to Glucan endo-1,3-beta-glucosidase GV (EC 3.2.1.39) ((1->3)-beta-glucan endohydrolase GV) ((1->3)-beta-glucanase isoenzyme GV) (Beta-1,3- endoglucanase GV). (Os01t0946700-01)
LOC_Os01g71860	Os01g0947000	1.98189	chr01	41629302	41631696	Similar to Beta-1,3-glucanase precursor. (Os01t0947000-01)
LOC_Os01g72270	None	2.5225	#N/A	#N/A	#N/A	#N/A
LOC_Os01g72460	Os01g0954000	1.01701	chr01	42018073	42019444	NADPH-dependent FMN reductase family protein. (Os01t0954000-01)
LOC_Os01g72530	Os01g0955100	1.80276	chr01	42074192	42074866	Calmodulin-like protein, Drought and salt tolerance (Os01t0955100-01)
LOC_Os01g74370	Os01g0975000	1.49433	chr01	43078802	43080400	Protein of unknown function DUF966 family protein. (Os01t0975000-01);Protein of unknown function DUF966 family protein. (Os01t0975000-02)
LOC_Os02g01100	Os02g0101000	1.46736	chr02	50308	55886	Amino acid transporter, transmembrane domain containing protein. (Os02t0101000-01);Similar to amino acid permease. (Os02t0101000-02)
LOC_Os02g01326	Os02g0103600	1.37485	chr02	175818	179370	Protein of unknown function DUF6, transmembrane domain containing protein. (Os02t0103600-01)
LOC_Os02g02210	Os02g0112900	3.87442	chr02	679468	697321	&gamma;-aminobutyrate transaminase, Response to blast fungus infection, mechanical wounding and ultraviolet radiation (Os02t0112900-01)
LOC_Os02g04340	Os02g0136000	1.549	chr02	1913422	1916137	Phox/Bem1p domain containing protein. (Os02t0136000-00)
LOC_Os02g05550	None	1.47185	#N/A	#N/A	#N/A	#N/A
LOC_Os02g07170	Os02g0168200	2.537	chr02	3682192	3684126	Similar to Transfactor-like protein. (Os02t0168200-01)
LOC_Os02g09810	Os02g0191300	1.89253	chr02	5058825	5061929	A member of the ATLa/AVT6 subfamily, Amino acid transporter-like 6 protein, Amino acid homeostasis, Modulation of the vacuolar storage of glutamine in roots (Os02t0191300-01)
LOC_Os02g09830	Os02g0191600	1.07246	chr02	5067166	5068036	Basic leucine zipper transcription factor 16, bZIP transcription factor 16, Positive regulation of drought resistance (Os02t0191600-01)
LOC_Os02g12350	Os02g0214900	2.54605	chr02	6424577	6430587	Class-I type histone deacetylase, Reproductive development, Seed morphology (Os02t0214900-01);Similar to Histone deacetylase. (Os02t0214900-02)
LOC_Os02g12380	Os02g0215200	2.17609	chr02	6447078	6453167	Class-I type histone deacetylase, Vegetative growth (Os02t0215200-01);Similar to Histone deacetylase. (Os02t0215200-02);Similar to Histone deacetylase. (Os02t0215200-03)
LOC_Os02g12680	Os02g0218700	5.2943	chr02	6628383	6630103	Allene oxide synthase (CYP74A3), Fatty acid 9-/13-hydroperoxide lyase (CYP74C), Biosynthesis of jasmonic acid (JA), Plant defense (Os02t0218700-01)
LOC_Os02g14480	Os02g0241100	1.01628	chr02	7975665	7978686	Protein kinase, core domain containing protein. (Os02t0241100-01)
LOC_Os02g15560	None	1.9332	#N/A	#N/A	#N/A	#N/A
LOC_Os02g16940	Os02g0269600	2.91762	chr02	9650760	9656236	Similar to Subtilase. (Os02t0269600-00)
LOC_Os02g17000	Os02g0270200	3.80367	chr02	9712632	9715959	Similar to Subtilase. (Os02t0270200-01)
LOC_Os02g20960	None	1.0078	#N/A	#N/A	#N/A	#N/A
LOC_Os02g21920	Os02g0324700	1.02805	chr02	13039013	13040252	Similar to senescence-associated protein. (Os02t0324700-01)
LOC_Os02g22160	Os02g0327500	1.95416	chr02	13200808	13203751	Protein of unknown function DUF266, plant family protein. (Os02t0327500-01)
LOC_Os02g26280	None	3.02856	#N/A	#N/A	#N/A	#N/A
LOC_Os02g26430	Os02g0462800	1.78291	chr02	15521497	15522722	WRKY transcription factor 42, Transcriptional repressor, Promotion of leaf senescence (Os02t0462800-01)
LOC_Os02g26720	Os02g0466400	2.7325	chr02	15697843	15699151	Similar to Inositol phosphate kinase. (Os02t0466400-01)
LOC_Os02g30100	Os02g0503900	1.24381	chr02	17873662	17875911	Cytochrome P450 family protein. (Os02t0503900-01)
LOC_Os02g32140	Os02g0521100	1.46958	chr02	18986685	18987266	Hypothetical conserved gene. (Os02t0521100-01)
LOC_Os02g32520	Os02g0526400	2.40997	chr02	19251968	19256233	Caseinolytic protease regulatory ATPase module, Intrinsic chaperone, Tolerance to salt and desiccation stresses (Os02t0526400-01)
LOC_Os02g32610	Os02g0527600	1.18387	chr02	19324219	19332130	Functional homolog of Arabidopsis Raf-like protein CONSTITUTIVE TRIPLE RESPONSE1 (CTR1), Ethylene-receptor signalling (Os02t0527600-01)
LOC_Os02g32660	Os02g0528200	1.26001	chr02	19355790	19367127	Starch branching enzyme 3, Starch synthesis (Os02t0528200-01)
LOC_Os02g32970	Os02g0532300	1.02189	chr02	19591287	19595510	Hypothetical conserved gene. (Os02t0532300-01);Alpha/beta hydrolase fold-1 domain containing protein. (Os02t0532300-02)
LOC_Os02g36020	Os02g0568700	2.32933	chr02	21638727	21648937	Ent-kaurene synthase (KS) like diterpene synthase (Os02t0568700-01)
LOC_Os02g36030	Os02g0569000	1.82982	chr02	21662608	21664276	Cytochrome P450 family protein. (Os02t0569000-01)
LOC_Os02g36210	Os02g0571100	1.31222	chr02	21841092	21847545	Ent-copalyl diphosphate synthase, Defense against both fungal pathogen and bacterial pathogen, Biosynthesis of phytoalexin (Os02t0571100-01)
LOC_Os02g40330	Os02g0616600	1.61689	chr02	24409317	24414084	Hypothetical protein. (Os02t0616600-01);Conserved hypothetical protein. (Os02t0616600-02)
LOC_Os02g41510	Os02g0624300	1.44013	chr02	24878777	24879932	R2R3-type MYB transcription factor, Negative regulation of cold tolerance, Maintenance of Pi homeostasis (Os02t0624300-01)
LOC_Os02g41840	Os02g0629000	2.10992	chr02	25153298	25154265	Protein of unknown function DUF584 family protein. (Os02t0629000-01)
LOC_Os02g42430	Os02g0636600	1.1018	chr02	25523466	25524380	GRAM domain containing protein. (Os02t0636600-00)
LOC_Os02g42640	Os02g0639300	3.7132	chr02	25646627	25648251	Conserved hypothetical protein. (Os02t0639300-01)
LOC_Os02g43330	Os02g0649300	1.84668	chr02	26143311	26144729	HD-ZIP I protein, Transcription activator, Stress response, Panicle development (Os02t0649300-01)
LOC_Os02g44870	Os02g0669100	1.09614	chr02	27165514	27166898	SK<sub>3</sub>-type dehydrin, Response to abiotic stress, Drought and salt stress tolerance (Os02t0669100-01)
LOC_Os02g45390	Os02g0676500	1.00014	chr02	27602322	27606779	Similar to OSIGBa0127A14.6 protein. (Os02t0676500-00)
LOC_Os02g45420	Os02g0676800	2.40635	chr02	27621222	27622912	Similar to Dehydration responsive element binding protein 1E (DREB1E protein). (Os02t0676800-01)
LOC_Os02g45450	Os02g0677300	1.28141	chr02	27652935	27654206	Typical CBF/DREB1 transcription factor, Dehydration-responsive element binding protein 1G, Cold stress tolerance, Positive regulation of heat, salt and drought tolerance (Os02t0677300-02)
LOC_Os02g45780	Os02g0682300	2.94566	chr02	27887212	27888250	RING-type E3 ligase, Negative regulation of cuticular wax biosynthesis, Drought stress response (Os02t0682300-01)
LOC_Os02g46100	Os02g0686100	1.44789	chr02	28096979	28098029	E3 ubiquitin ligase, Regulation of tolerance to cold stress (Os02t0686100-01)
LOC_Os02g46180	Os02g0686800	2.98878	chr02	28136347	28137459	FCS-like zinc finger (FLZ) protein 6, Submergence response (Os02t0686800-01)
LOC_Os02g46910	Os02g0696500	1.18387	chr02	28622391	28624619	Concanavalin A-like lectin/glucanase domain containing protein. (Os02t0696500-01);Similar to Xyloglucan endotransglucosylase/hydrolasev protein 30 (Fragment). (Os02t0696500-02)
LOC_Os02g48200	Os02g0712600	1.61502	chr02	29515727	29518756	Concanavalin A-like lectin/glucanase domain containing protein. (Os02t0712600-01)
LOC_Os02g48850	Os02g0720400	2.46787	chr02	29886216	29888140	Protein of unknown function DUF506, plant domain containing protein. (Os02t0720400-00)
LOC_Os02g48860	Os02g0720500	1.10866	chr02	29890269	29891334	Peptidase A1 domain containing protein. (Os02t0720500-01)
LOC_Os02g49340	None	1.32454	#N/A	#N/A	#N/A	#N/A
LOC_Os02g50600	Os02g0739400	1.01602	chr02	30899582	30901300	Similar to Avr9/Cf-9 rapidly elicited protein 231 precursor. (Os02t0739400-01)
LOC_Os02g50690	Os02g0740400	1.1776	chr02	30965666	30967599	Similar to GSDL-motif lipase. (Os02t0740400-01);Lipase, GDSL domain containing protein. (Os02t0740400-02)
LOC_Os02g51290	Os02g0747500	1.39117	chr02	31407197	31409585	Similar to HVA22-like protein e (AtHVA22e). (Os02t0747500-01)
LOC_Os02g51350	Os02g0748300	1.27024	chr02	31444678	31447719	Similar to VMP3 protein. (Os02t0748300-01);Similar to Kelch motif family protein. (Os02t0748300-02)
LOC_Os02g51890	Os02g0755400	1.62331	chr02	31781578	31787144	Similar to RNA recognition motif-containing protein SEB-4. (Os02t0755400-01)
LOC_Os02g51930	Os02g0755900	2.04813	chr02	31805977	31807800	UDP-glucuronosyl/UDP-glucosyltransferase domain containing protein. (Os02t0755900-01)
LOC_Os02g52210	Os02g0759400	1.64949	chr02	31967805	31969537	RING-type E3 ubiquitin ligase, Rice homolog of Arabidopsis T&oacute;xicos en Levadura, Negative regulation of cold stress response (Os02t0759400-01)
LOC_Os02g52540	None	1.94225	#N/A	#N/A	#N/A	#N/A
LOC_Os02g52580	Os02g0763501	2.808	chr02	32174923	32176156	Similar to Serine threonine kinase 1. (Os02t0763501-00)
LOC_Os02g52590	Os02g0763800	1.92286	chr02	32177755	32179122	Xyloglucan fucosyltransferase domain containing protein. (Os02t0763800-01)
LOC_Os02g52670	Os02g0764700	1.93104	chr02	32204425	32205335	Similar to Ethylene-responsive transcription factor 4 (Ethylene-responsive element binding factor 4) (Related to APETALA-2 protein 5) (EREBP-4) (AtERF4). (Os02t0764700-01)
LOC_Os02g53130	Os02g0770800	2.71716	chr02	32513749	32517155	NADH/NADPH-dependent nitrate reductase (Os02t0770800-01)
LOC_Os02g54254	Os02g0783700	1.0353	chr02	33253386	33264913	Similar to Lysine ketoglutarate reductase/saccharopine dehydrogenase. (Os02t0783700-01);Lysine ketoglutarate reductase/saccharopine dehydrogenase, Lysine-degrading enzyme in developing grain (Os02t0783700-02)
LOC_Os02g55890	Os02g0802500	1.32369	chr02	34210424	34214885	Vacuolar H<sup>+</sup>-pyrophosphatase, Response to anoxia (Os02t0802500-01);Similar to Proton translocating pyrophosphatase. (Os02t0802500-02)
LOC_Os03g02874	None	1.98169	#N/A	#N/A	#N/A	#N/A
LOC_Os03g03034	Os03g0122300	1.14546	chr03	1235460	1244932	Flavanone 3-hydroxylase, Salicylic acid hydroxylase 1, Positive regulation of flavonoid biosynthesis, Resistance to brown planthopper (BPH) (Os03t0122300-01);Similar to Oxidoreductase, 2OG-Fe oxygenase family protein, expressed. (Os03t0122300-02)
LOC_Os03g06250	Os03g0158600	1.02384	chr03	3132124	3132741	Hypothetical conserved gene. (Os03t0158600-00)
LOC_Os03g07170	Os03g0168000	1.2477	chr03	3674285	3678314	Major facilitator superfamily, general substrate transporter domain containing protein. (Os03t0168000-01)
LOC_Os03g07180	Os03g0168100	2.27183	chr03	3678292	3679969	Late embryogenesis abundant protein repeat containing protein. (Os03t0168100-01)
LOC_Os03g07930	Os03g0176100	1.58728	chr03	4047742	4050253	Similar to predicted protein. (Os03t0176100-00)
LOC_Os03g09170	Os03g0191900	1.04867	chr03	4780248	4781570	Pathogenesis-related transcriptional factor and ERF domain containing protein. (Os03t0191900-01)
LOC_Os03g09910	Os03g0195100	1.73349	chr03	4936472	4941037	Putative aminotransferase, Disease resistance response against infection with rice blast fungus (Os03t0195100-01)
LOC_Os03g10800	Os03g0205700	1.05988	chr03	5530670	5534319	BTB domain containing protein. (Os03t0205700-01);Photoreceptor-interacting protein-like. (Os03t0205700-02)
LOC_Os03g12820	Os03g0230300	1.73276	chr03	6895178	6898355	Homologue of SRO (similar to RCD one), Regulation of stomatal closure, Abiotic stress response (Os03t0230300-01);Non-protein coding transcript. (Os03t0230300-02)
LOC_Os03g13140	Os03g0233900	2.27565	chr03	7092864	7093988	Non-symbiotic hemoglobin, Phytoglobin, Response to low mineral nutrients and abiotic stresses (Os03t0233900-01)
LOC_Os03g14370	Os03g0247900	1.19799	chr03	7815147	7817732	ACT domain repeat protein 9 (Os03t0247900-01)
LOC_Os03g15270	Os03g0258200	1.60166	chr03	8352195	8353718	Alpha/beta hydrolase fold-3 domain containing protein. (Os03t0258200-01)
LOC_Os03g15340	Os03g0259100	3.96879	chr03	8396569	8397410	Similar to Basic blue protein (Cusacyanin) (Plantacyanin) (CBP). (Os03t0259100-01)
LOC_Os03g16030	Os03g0267000	2.39526	chr03	8834869	8835576	Small heat shock protein, Heavy metal resistance, Regulation of Cu tolerance, Regulation of bacterial leaf streak (BLS) and bacterial blight (BB) resistance (Os03t0267000-01)
LOC_Os03g16670	Os03g0273800	1.03514	chr03	9202541	9204642	HAD-superfamily hydrolase, subfamily IA, variant 3 domain containing protein. (Os03t0273800-01)
LOC_Os03g16920	Os03g0277300	1.52584	chr03	9411494	9416082	Heat shock protein 70. (Os03t0277300-01)
LOC_Os03g17790	Os03g0286900	2.3521	chr03	9899776	9900385	RCI2 (rare cold-inducible 2) family protein, Drought resistance (Os03t0286900-01)
LOC_Os03g17870	Os03g0288000	1.02584	chr03	9957175	9958291	Type 1 metallothionein isoform, Positive regulation of resistance to blast disease (Os03t0288000-01);Similar to Metallothionein. (Os03t0288000-02)
LOC_Os03g18030	Os03g0289800	1.31551	chr03	10039387	10044161	Similar to Leucoanthocyanidin dioxygenase-like protein. (Os03t0289800-01)
LOC_Os03g18490	Os03g0296200	3.14191	chr03	10366901	10368154	Conserved hypothetical protein. (Os03t0296200-00)
LOC_Os03g18970	Os03g0301700	1.32165	chr03	10621704	10625395	Similar to Calmodulin-binding protein phosphatase. (Os03t0301700-01);Similar to Calmodulin-binding protein phosphatase. (Os03t0301700-02)
LOC_Os03g19290	Os03g0305600	1.65312	chr03	10848558	10849987	Mitochondrial import inner membrane translocase, subunit Tim17/22 family protein. (Os03t0305600-01)
LOC_Os03g20550	Os03g0321700	1.48228	chr03	11650891	11652144	WRKY transcription factor, Component in the signal transduction pathways of auxin response, Disease resistance (Os03t0321700-01)
LOC_Os03g22020	Os03g0339400	2.25654	chr03	12618079	12619711	Haem peroxidase, plant/fungal/bacterial family protein. (Os03t0339400-01)
LOC_Os03g22680	Os03g0348900	1.143	chr03	13095799	13098282	Similar to CHY zinc finger family protein, expressed. (Os03t0348900-01);Ring finger E3 ubiquitin ligase, Abiotic stress tolerance (Os03t0348900-02)
LOC_Os03g22790	Os03g0351300	1.77374	chr03	13162037	13163727	Similar to beta-amylase. (Os03t0351300-00)
LOC_Os03g22820	Os03g0351700	1.16484	chr03	13189478	13190315	Conserved hypothetical protein. (Os03t0351700-01)
LOC_Os03g24160	Os03g0356582	1.22464	chr03	13712274	13716745	Phosphatidylinositol-4-phosphate 5-kinase, core domain containing protein. (Os03t0356582-01)
LOC_Os03g25760	Os03g0374500	2.17694	chr03	14739099	14741603	IQ-motif containing protein 3, Response to PEG, NaCl, ABA and MeJA stress (Os03t0374500-01)
LOC_Os03g26910	Os03g0386500	1.02975	chr03	15381800	15384276	Similar to Trehalose-6-phosphate phosphatase. (Os03t0386500-01)
LOC_Os03g27110	Os03g0388800	1.30398	chr03	15528226	15530171	Similar to Hydrolase. (Os03t0388800-01)
LOC_Os03g28090	Os03g0399000	1.93313	chr03	16151375	16153554	Pectin lyase fold domain containing protein. (Os03t0399000-01)
LOC_Os03g32230	Os03g0437200	3.45508	chr03	18435990	18437086	C2H2-type zinc finger protein, Abscisic acid-induced antioxidant defence, Water stress and oxidative stress tolerance (Os03t0437200-01)
LOC_Os03g33520	Os03g0448200	2.44923	chr03	19147007	19148677	Similar to Exo70 exocyst complex subunit family protein. (Os03t0448200-00)
LOC_Os03g36279	Os03g0561400	1.7252	chr03	20124488	20127262	Conserved hypothetical protein. (Os03t0561400-01)
LOC_Os03g41390	Os03g0610400	2.3402	chr03	23036335	23037381	Zinc finger, C2H2-like domain containing protein. (Os03t0610400-01)
LOC_Os03g43750	Os03g0638400	3.13682	chr03	24466606	24473558	Similar to OSIGBa0153E02-OSIGBa0093I20.19 protein. (Os03t0638400-01)
LOC_Os03g43880	Os03g0640000	1.1351	chr03	24616417	24617859	Patatin family protein. (Os03t0640000-00)
LOC_Os03g45800	Os03g0660200	2.29855	chr03	25866208	25866564	0
LOC_Os03g47280	Os03g0676400	1.23925	chr03	26752033	26752699	VQ domain containing protein. (Os03t0676400-01)
LOC_Os03g48750	Os03g0693700	3.00005	chr03	27779100	27780096	Similar to Oxalate oxidase 1 (EC 1.2.3.4) (Germin). (Os03t0693700-01)
LOC_Os03g48770	Os03g0693900	3.60979	chr03	27788230	27788913	Oxalate oxidase 3, Positive regulation of panicle blast resistance (Os03t0693900-01)
LOC_Os03g50490	Os03g0712800	2.42758	chr03	28822424	28826321	Cytosolic glutamine synthetase, Early stage of seed germination and grain filling under N deficient conditions (Os03t0712800-02)
LOC_Os03g52370	Os03g0734100	1.36454	chr03	30074926	30075707	Conserved hypothetical protein. (Os03t0734100-01);Conserved hypothetical protein. (Os03t0734100-02)
LOC_Os03g56010	Os03g0770000	1.3245	chr03	31885024	31885617	bZIP transcription factor, bZIP-1 domain containing protein. (Os03t0770000-00)
LOC_Os03g56060	Os03g0770800	1.10921	chr03	31930835	31934477	CSLC9. (Os03t0770800-01)
LOC_Os03g57640	Os03g0790500	3.6842	chr03	32851444	32852765	Alpha/beta hydrolase fold-3 domain containing protein. (Os03t0790500-01)
LOC_Os03g57720	Os03g0791200	1.60837	chr03	32897226	32898262	Similar to Aldehyde oxidase 1 (Fragment). (Os03t0791200-00)
LOC_Os03g57960	Os03g0793700	1.25478	chr03	33020035	33022850	Cupin domain protein, Regulation of seed vigour (Os03t0793700-01)
LOC_Os03g58764	Os03g0802100,Os03g0802200	1.8726	#N/A	#N/A	#N/A	#N/A
LOC_Os03g58850	Os03g0803066,Os03g0803100	1.99239	#N/A	#N/A	#N/A	#N/A
LOC_Os03g59460	Os03g0809200	1.11865	chr03	33844223	33845580	Similar to Transcription factor EmBP-1 (Fragment). (Os03t0809200-01)
LOC_Os03g60080	Os03g0815100	2.22759	chr03	34166100	34167521	NAC-domain transcription factor, Response to infection by M. grisea, MeJA-mediated signaling pathway, Drought and salinitytolerance (Os03t0815100-01)
LOC_Os03g60370	Os03g0818100	1.10757	chr03	34334756	34340133	Histidine acid phosphatase (HAP)-type phytase, Degradation of the phytins during the seed germination (Os03t0818100-01);Similar to Multiple inositol polyphosphate phosphatase PhyIIa2. (Os03t0818100-02)
LOC_Os03g60560	Os03g0820300	1.75119	chr03	34424180	34425030	TFIIIA-type zinc finger protein, Transcription activator, Abiotic stress tolerance (Os03t0820300-01)
LOC_Os03g60570	Os03g0820400	1.80818	chr03	34427704	34428391	Similar to ZPT2-13. (Os03t0820400-01)
LOC_Os03g61360	Os03g0829200	2.47247	chr03	34825502	34828944	Similar to Soluble epoxide hydrolase. (Os03t0829200-01);Similar to epoxide hydrolase 2. (Os03t0829200-02)
LOC_Os03g61500	Os03g0830500	3.28866	chr03	34883520	34884578	FW2.2-like (FWL) family protein, Regulation of cadmium and micronutrient metal accumulation (Os03t0830500-01)
LOC_Os03g63390	Os03g0850900	1.86111	chr03	35820760	35821517	Similar to Chemocyanin precursor (Basic blue protein) (Plantacyanin). (Os03t0850900-01)
LOC_Os03g64260	Os03g0860100	1.03763	chr03	36301491	36302407	Ethylene response factor, Transcriptional activator, Positive regulation of disease resistance (Os03t0860100-01)
LOC_Os04g01470	Os04g0104900	1.96555	chr04	316562	319162	Similar to 0-methyltransferase (EC 2.1.1.6) (Fragment). (Os04t0104900-01)
LOC_Os04g01740	Os04g0107900	1.14235	chr04	483234	485978	Similar to Heat shock protein 82. (Os04t0107900-01);Heat shock protein 81-1 (HSP81-1) (Heat shock protein 83). (Os04t0107900-02);Similar to Heat shock protein 80. (Os04t0107900-03);Similar to Heat shock protein 82. (Os04t0107900-04);Non-protein coding transcript. (Os04t0107900-05)
LOC_Os04g10569	Os04g0184500	2.55222	chr04	5739476	5740015	Similar to OSIGBa0148J22.3 protein. (Os04t0184500-00)
LOC_Os04g12970	Os04g0206600	1.47168	chr04	7156820	7159820	UDP-glucosyltransferase, Detoxification of deoxynivalenol (Os04t0206600-01)
LOC_Os04g13210	Os04g0209200	1.40913	chr04	7301574	7313221	C-type ABC transporter, Cadmium tolerance and accumulation (Os04t0209200-01)
LOC_Os04g19114	None	1.16026	#N/A	#N/A	#N/A	#N/A
LOC_Os04g20290	None	2.26003	#N/A	#N/A	#N/A	#N/A
LOC_Os04g25650	Os04g0322100	2.41926	chr04	14863727	14864824	Protein of unknown function DUF26 domain containing protein. (Os04t0322100-01)
LOC_Os04g27810	None	2.12037	#N/A	#N/A	#N/A	#N/A
LOC_Os04g30260	Os04g0371100	1.06375	chr04	18061313	18064800	Similar to OSIGBa0134J07.7 protein. (Os04t0371100-00)
LOC_Os04g32320	Os04g0394100	1.36079	chr04	19373688	19376820	Similar to H0718E12.3 protein. (Os04t0394100-00)
LOC_Os04g32480	Os04g0395800	1.38272	chr04	19492605	19497140	Tify domain containing protein. (Os04t0395800-01)
LOC_Os04g33820	Os04g0414500	1.38825	chr04	20485797	20487086	Similar to H0622F05.2 protein. (Os04t0414500-01)
LOC_Os04g34970	Os04g0429050	1.28279	chr04	21248865	21249599	Similar to OSIGBa0093L02.1 protein. (Os04t0429050-00)
LOC_Os04g35250	Os04g0432100	2.13176	chr04	21424187	21425721	Transcription factor GRAS domain containing protein. (Os04t0432100-00)
LOC_Os04g35270	Os04g0432300	1.58139	chr04	21447893	21449455	Similar to 4-alpha-L-fucosyltransferase. (Os04t0432300-00)
LOC_Os04g37490	Os04g0447700	1.75901	chr04	22323860	22326881	Similar to Polyketide reductase. (Os04t0447700-01)
LOC_Os04g37520	Os04g0448000	1.52343	chr04	22335579	22337098	Similar to OSIGBa0152K17.7 protein. (Os04t0448000-00)
LOC_Os04g37770	Os04g0450701	2.22089	chr04	22452038	22452591	Hypothetical protein. (Os04t0450701-00)
LOC_Os04g38680	Os04g0460300	1.98564	chr04	22977821	22980329	Amino acid transporter, transmembrane domain containing protein. (Os04t0460300-01)
LOC_Os04g39360	None	1.13532	#N/A	#N/A	#N/A	#N/A
LOC_Os04g39980	Os04g0475600	1.2497	chr04	23795593	23797531	2-oxoglutarate-dependent-Fe (II) dioxygenase, Anther dehiscence, Pollen fertility, Seed initiation, Maintenance of auxin homeostasis in reproductive organs (Os04t0475600-01)
LOC_Os04g40070	Os04g0476600	1.59654	chr04	23859323	23863234	C2 calcium-dependent membrane targeting domain containing protein. (Os04t0476600-01)
LOC_Os04g40990	Os04g0486950	1.21188	chr04	24325769	24328250	Similar to Malate synthase. (Os04t0486950-01)
LOC_Os04g43200	Os04g0511200	2.10065	chr04	25563419	25565153	Caleosin peroxygenase, Calcium-binding and phospholipid-binding protein, Negative regulation of salt stress tolerance (Os04t0511200-01)
LOC_Os04g43440	Os04g0514600	1.67378	chr04	25708429	25712602	Similar to NBS-LRR type disease resistance protein O2 (Fragment). (Os04t0514600-00)
LOC_Os04g43680	Os04g0517100	2.06742	chr04	25843038	25844912	Similar to OSIGBa0145M07.4 protein. (Os04t0517100-01);SG2-type MYB transcription factor, Cold tolerance, Resistance to fungal and bacterial pathogens, Panicle development (Os04t0517100-02)
LOC_Os04g44550	Os04g0527700	1.38804	chr04	26372064	26375184	CHCH domain containing protein. (Os04t0527700-01)
LOC_Os04g45590	Os04g0538900	3.14287	chr04	26975483	26976420	Glyoxalase/bleomycin resistance protein/dioxygenase domain containing protein. (Os04t0538900-00)
LOC_Os04g48350	Os04g0572400	1.61741	chr04	28820116	28821919	Dehydration-responsive element binding protein 1E, Chilling tolerance, Positive regulation of heat tolerance (Os04t0572400-01)
LOC_Os04g49360	Os04g0583000	1.72573	chr04	29454845	29459592	Conserved hypothetical protein. (Os04t0583000-01)
LOC_Os04g49980	Os04g0589800	2.0477	chr04	29811954	29812662	Late embryogenesis abundant (LEA) group 1 family protein. (Os04t0589800-01)
LOC_Os04g50790	Os04g0594400	1.10989	chr04	30046907	30050579	Aldo/keto reductase domain containing protein. (Os04t0594400-01)
LOC_Os04g50940	Os04g0597600	4.40482	chr04	30156252	30159310	Nitrate transporter, Regulation of tiller number and grain yield (Os04t0597600-01);Nitrate transporter, Regulation of tiller number and grain yield (Os04t0597600-02)
LOC_Os04g51150	Os04g0600200	1.34191	chr04	30287197	30289860	Homodimeric diiron-carboxylate protein, Cyanide-resistant respiration in mitochondria, Reactive oxygen species (ROS) scavenging (Os04t0600200-01)
LOC_Os04g51160	Os04g0600300	1.45736	chr04	30291463	30293040	Homodimeric diiron-carboxylate protein, Cyanide-resistant respiration in mitochondria, Reactive oxygen species (ROS) scavenging (Os04t0600300-01)
LOC_Os04g52110	Os04g0610600	3.11008	chr04	30950939	30952114	Similar to Cor14b protein precursor. (Os04t0610600-01)
LOC_Os04g52810	Os04g0619000	1.06387	chr04	31439595	31443397	Similar to L1332.9 protein. (Os04t0619000-01)
LOC_Os04g53994	Os04g0631800	1.48065	chr04	32173571	32177352	S-Domain kinase-6, Response to drought in tolerant genotype, Response to Xanthomonas oryzae pv. Oryzae and R. solani. (Os04t0631800-00)
LOC_Os04g55720	Os04g0650800	1.1232	chr04	33167054	33169881	3-phosphoglycerate dehydrogenase 1, Serine biosynthesis (Os04t0650800-01);Similar to H0212B02.14 protein. (Os04t0650800-02)
LOC_Os04g55980	Os04g0653700	3.685	chr04	33347881	33348507	Conserved hypothetical protein. (Os04t0653700-01)
LOC_Os04g56030	Os04g0654400	1.01222	chr04	33374335	33375212	Eggshell protein family protein. (Os04t0654400-01)
LOC_Os04g56040	Os04g0654500	1.53453	chr04	33377245	33378457	Conserved hypothetical protein. (Os04t0654500-01)
LOC_Os04g56430	Os04g0659300	2.76795	chr04	33641298	33642277	Receptor-like protein, Root development, Salt stress response, Regulation of iron acquisition (Os04t0659300-01)
LOC_Os04g56470	Os04g0659800	1.01474	chr04	33658425	33664069	Similar to OSIGBa0132E09-OSIGBa0108L24.20 protein. (Os04t0659800-00)
LOC_Os04g57810	Os04g0674400	1.43218	chr04	34423647	34426231	Rice ortholog of yeast Dre2 and human Anamorsin, Regulation of chitin-induced immune responses (Os04t0674400-01)
LOC_Os04g58190	Os04g0678400	1.15644	chr04	34655316	34656735	DOF transcription factor 17, Transcriptional activator, Regulation of grain quality (Os04t0678400-01)
LOC_Os04g58850	Os04g0685300	1.42196	chr04	35001018	35002142	Harpin-induced 1 domain containing protein. (Os04t0685300-02)
LOC_Os04g59190	Os04g0688300	1.03901	chr04	35207157	35208610	Haem peroxidase, plant/fungal/bacterial family protein. (Os04t0688300-01)
LOC_Os05g01380	Os05g0104200	1.13393	chr05	230784	231999	Polygalacturonase inhibiting protein, Inhibitor of fungal polygalacturonase, Sheath blight resistance (Os05t0104200-01)
LOC_Os05g03130	Os05g0122700	1.29276	chr05	1246357	1247008	Similar to Low-temperature induced protein lt101.2. (Os05t0122700-01)
LOC_Os05g03460	Os05g0125300	1.23592	chr05	1461362	1463780	Similar to Receptor protein kinase-like protein. (Os05t0125300-00)
LOC_Os05g03480	Os05g0125500	1.3549	chr05	1470049	1473944	Similar to Isovaleryl-CoA dehydrogenase, mitochondrial precursor (EC 1.3.99.10) (IVD). (Os05t0125500-01)
LOC_Os05g04210	Os05g0132700	1.45648	chr05	1907665	1909355	Similar to R2R3 Myb-like protein. (Os05t0132700-01)
LOC_Os05g04700	Os05g0138300	1.04907	chr05	2219581	2220618	Similar to ICT protein (Fragment). (Os05t0138300-01);Hydrophobic protein homologous to Arabidopsis RCI2, Cold stress-response (Os05t0138300-03)
LOC_Os05g05930	Os05g0151200	3.11008	chr05	2969525	2970353	TspO/MBR-related protein family protein. (Os05t0151200-01)
LOC_Os05g07710	Os05g0169200	1.31465	chr05	4144983	4148965	WD40 repeat-like domain containing protein. (Os05t0169200-01)
LOC_Os05g07810	Os05g0170200	1.09549	chr05	4205610	4207693	Similar to Universal stress protein. (Os05t0170200-01);Similar to universal stress protein family protein. (Os05t0170200-02)
LOC_Os05g10620	Os05g0194500	2.1956	chr05	5784144	5789558	Similar to ANAC075. (Os05t0194500-01)
LOC_Os05g10650	Os05g0194900	1.06062	chr05	5814320	5815467	Similar to Pyrophosphate-fructose-6-phosphate 1-phosphotransferase-like protein (Pyrophosphate-dependent phosphofructo-1-kinase-like protein). (Os05t0194900-01)
LOC_Os05g12040	Os05g0211100	2.34069	chr05	6882735	6884876	Similar to Cytochrome P450-like protein. (Os05t0211100-01);Obtusifoliol 14a-demethylase, Phytosterol and Brassinosteroid biosynthesis (Os05t0211100-02)
LOC_Os05g13970	Os05g0228000	2.91723	chr05	7775450	7780974	Purine and other phosphorylases, family 1 protein. (Os05t0228000-01);Purine and other phosphorylases, family 1 protein. (Os05t0228000-02)
LOC_Os05g15530	Os05g0244700	1.72795	chr05	8785502	8787555	Aminotransferase, class IV family protein. (Os05t0244700-01);Aminotransferase, class IV family protein. (Os05t0244700-02)
LOC_Os05g15770	Os05g0247100	1.23526	chr05	8902501	8903789	Similar to Glycosyl hydrolases family 18. (Os05t0247100-01);Chitinase III protein, Xylanase inhibitor, Regulation of abiotic stress response, Resistance to herbivores (Os05t0247100-02)
LOC_Os05g15880	Os05g0247800	1.47624	chr05	8959416	8960566	Xylanase inhibitor protein, Defence response (Os05t0247800-01)
LOC_Os05g27590	Os05g0342100	2.25654	chr05	16058314	16059130	Wound-induced protein, Wun1 domain containing protein. (Os05t0342100-01)
LOC_Os05g29810	Os05g0361700	1.60367	chr05	17246987	17248234	Similar to EREBP-2 protein (Fragment). (Os05t0361700-01);Similar to ethylene responsive element binding protein 2. (Os05t0361700-02)
LOC_Os05g33130	Os05g0399300	2.30454	chr05	19426432	19427874	Class I chitinase, Defense against fungal pathogens (Os05t0399300-01)
LOC_Os05g33400	Os05g0402900	1.58797	chr05	19631965	19633439	Similar to EDGP. (Os05t0402900-01)
LOC_Os05g33410	Os05g0403000	3.62531	chr05	19634463	19635893	Peptidase aspartic, catalytic domain containing protein. (Os05t0403000-01)
LOC_Os05g33960	Os05g0410500	2.14521	chr05	20045195	20049272	TGF-beta receptor, type I/II extracellular region family protein. (Os05t0410500-01)
LOC_Os05g34830	Os05g0421600	1.88007	chr05	20678578	20680160	No apical meristem (NAM) protein domain containing protein. (Os05t0421600-01)
LOC_Os05g34854	Os05g0421900	1.21478	chr05	20685488	20692048	GA 20-oxidase4, GA metabolism (Os05t0421900-00)
LOC_Os05g36260	Os05g0438500	1.76831	chr05	21491943	21493609	Similar to Soluble inorganic pyrophosphatase (EC 3.6.1.1) (Pyrophosphate phospho- hydrolase) (PPase). (Os05t0438500-01)
LOC_Os05g37050	None	1.27954	#N/A	#N/A	#N/A	#N/A
LOC_Os05g39250	Os05g0468800	2.82471	chr05	23013524	23014346	Phosphatidylethanolamine-binding protein PEBP domain containing protein. (Os05t0468800-01)
LOC_Os05g39770	Os05g0475400	1.82666	chr05	23356169	23360022	Similar to Alanine:glyoxylate aminotransferase-like protein (Fragment). (Os05t0475400-01);Aminotransferase, Regulation of abiotic stress responses (Os05t0475400-02)
LOC_Os05g39930	Os05g0476700	1.5546	chr05	23463142	23465536	U-box E3ubiquitin ligase, Positive regulation of cold stress response (Os05t0476700-01)
LOC_Os05g43110	Os05g0506700	1.87458	chr05	25029800	25030728	0
LOC_Os05g43390	Os05g0509500	1.13866	chr05	25229702	25233200	Similar to Signal recognition particle 54 kDa protein 2 (SRP54). (Os05t0509500-01)
LOC_Os05g43640	Os05g0512100	2.18322	chr05	25379290	25380110	Uncharacterised conserved protein UCP031279 domain containing protein. (Os05t0512100-00)
LOC_Os05g45070	Os05g0526700	1.34686	chr05	26189646	26190616	Harpin-induced 1 domain containing protein. (Os05t0526700-01)
LOC_Os05g45100	Os05g0527000	2.6345	chr05	26198411	26200034	UDP-glucuronosyl/UDP-glucosyltransferase family protein. (Os05t0527000-01)
LOC_Os05g46350	Os05g0541100	1.43241	chr05	26863363	26866131	IQ calmodulin-binding region domain containing protein. (Os05t0541100-01)
LOC_Os05g46480	Os05g0542500	3.76026	chr05	26927607	26928882	Similar to Isoform 2 of Late embryogenesis abundant protein, group 3. (Os05t0542500-01);Late embryogenesis abundant (LEA) protein, Drought and salt stress response (Os05t0542500-02)
LOC_Os05g46760	Os05g0545400	1.24299	chr05	27075999	27077365	Serine/threonine protein kinase domain containing protein. (Os05t0545400-01)
LOC_Os05g48810	Os05g0562300	1.20242	chr05	27972462	27974607	Similar to DnaJ-like protein. (Os05t0562300-01)
LOC_Os05g49730	Os05g0572700	1.47448	chr05	28523815	28526025	Similar to protein phosphatase 2C ABI1. (Os05t0572700-01);Similar to Protein phosphatase 2C. (Os05t0572700-02)
LOC_Os05g50380	Os05g0580000	1.17048	chr05	28871794	28877277	Chloroplastic/amyloplastic ADP-glucose pyrophosphorylase large subunit, Starch synthesis in the early stage of developing endosperm, Stem starch accumulation (Os05t0580000-01)
LOC_Os05g50570	Os05g0582500	1.80894	chr05	28995973	28997546	Peptidase S10, serine carboxypeptidase domain containing protein. (Os05t0582500-01)
LOC_Os05g51680	Os05g0595200	2.25654	chr05	29634921	29638262	Allergen V5/Tpx-1 related family protein. (Os05t0595200-01);Similar to allergen V5/Tpx-1-related family protein. (Os05t0595200-02)
LOC_Os06g02640	Os06g0116933	2.30454	chr06	937904	938638	Conserved hypothetical protein. (Os06t0116933-00)
LOC_Os06g03670	Os06g0127100	1.90616	chr06	1434770	1435533	Dehydration-responsive element binding protein 1C, Chilling tolerance, Positive regulation of heat tolerance, Positive regulation of salt tolerance (Os06t0127100-01)
LOC_Os06g03710	Os06g0127800	1.56253	chr06	1465500	1468583	GAI-RGA-SCR (GRAS) family protein, Brassinosteroid signaling (Os06t0127800-01)
LOC_Os06g03860	Os06g0129400	1.02586	chr06	1554861	1561163	Splicing variant of SPX-MFS protein 3 (Os06t0129400-01);Vacuolar phosphate efflux transporter, Pi homeostasis (Os06t0129400-02)
LOC_Os06g05320	Os06g0145600	1.89097	chr06	2394821	2396562	Transferase family protein. (Os06t0145600-01)
LOC_Os06g09560	Os06g0195800	1.94085	chr06	4868189	4870144	Similar to DNAJ heat shock N-terminal domain-containing protein. (Os06t0195800-01)
LOC_Os06g10230	Os06g0203800	1.94377	chr06	5244239	5251843	Receptor-like kinase, Heat tolerance (Os06t0203800-01)
LOC_Os06g11200	Os06g0215500	1.07048	chr06	5878574	5880549	Similar to Oxo-phytodienoic acid reductase. (Os06t0215500-01)
LOC_Os06g13560	Os06g0244000	1.52148	chr06	7480272	7482194	Similar to anthranilic acid methyltransferase 3. (Os06t0244000-01)
LOC_Os06g14400	Os06g0255100	1.081	chr06	8038476	8041831	2OG-Fe(II) oxygenase domain containing protein. (Os06t0255100-01)
LOC_Os06g14810	Os06g0260500	1.84729	chr06	8408770	8410450	Similar to 3-ketoacyl-CoA synthase. (Os06t0260500-00)
LOC_Os06g17070	None	2.59802	#N/A	#N/A	#N/A	#N/A
LOC_Os06g19630	Os06g0300500	2.19444	chr06	11200132	11203938	Steroid nuclear receptor, ligand-binding domain containing protein. (Os06t0300500-01)
LOC_Os06g21410	Os06g0319133	1.47391	chr06	12366482	12367048	Arabinogalactan protein homologue (Os06t0319133-01)
LOC_Os06g21820	Os06g0323100	1.30405	chr06	12604824	12606640	Similar to H1005F08.18 protein. (Os06t0323100-01)
LOC_Os06g21910	Os06g0324400	1.87458	chr06	12665605	12666203	Late embryogenesis abundant (LEA) group 1 family protein. (Os06t0324400-01)
LOC_Os06g23350	Os06g0341300	2.17706	chr06	13630101	13631408	Seed maturation protein domain containing protein. (Os06t0341300-01)
LOC_Os06g25010	Os06g0356800	1.58612	chr06	14646987	14648089	Similar to Xylanase inhibitor protein I precursor. (Os06t0356800-01)
LOC_Os06g31090	Os06g0507300	1.9426	chr06	18079011	18079819	Similar to GAMYB-binding protein. (Os06t0507300-01)
LOC_Os06g35650	Os06g0549600	1.08521	chr06	20808194	20810005	FAD-linked oxidase, FAD-binding, subdomain 2 domain containing protein. (Os06t0549600-01)
LOC_Os06g35700	Os06g0549900	2.0874	chr06	20832520	20834491	FAD linked oxidase, N-terminal domain containing protein. (Os06t0549900-01)
LOC_Os06g35960	Os06g0553100	1.72438	chr06	20998086	20998850	Similar to Heat stress transcription factor C-2b. (Os06t0553100-01)
LOC_Os06g36560	Os06g0561000	1.92608	chr06	21478477	21482381	Myo-inositol oxygenase, Drought stress tolerance (Os06t0561000-01)
LOC_Os06g37140	None	1.76618	#N/A	#N/A	#N/A	#N/A
LOC_Os06g38670	Os06g0586150	1.38352	chr06	22958561	22962173	Protein kinase, catalytic domain domain containing protein. (Os06t0586150-00)
LOC_Os06g39240	Os06g0592500	2.1469	chr06	23293383	23294073	Similar to Ethylene-responsive transcriptional coactivator. (Os06t0592500-01)
LOC_Os06g40930	None	1.8933	#N/A	#N/A	#N/A	#N/A
LOC_Os06g43090	Os06g0637500	1.43948	chr06	25899446	25900813	MYB transcription factor, Regulation of leaf senescence (Os06t0637500-02)
LOC_Os06g43880	Os06g0646900	2.12838	chr06	26435460	26439235	Similar to Homogentisic acid geranylgeranyl transferase. (Os06t0646900-01);Homogentisate geranylgeranyl transferase, Tocotrienol (vitamin E) biosynthesis (Os06t0646900-02)
LOC_Os06g44160	Os06g0650900	1.1036	chr06	26646375	26647794	Conserved hypothetical protein. (Os06t0650900-01);Heat shock protein DnaJ family protein. (Os06t0650900-02)
LOC_Os06g45184	Os06g0662550	1.71227	chr06	27319482	27322589	Conserved hypothetical protein. (Os06t0662550-01)
LOC_Os06g46740	Os06g0681200	2.60482	chr06	28388375	28389574	Cupredoxin domain containing protein. (Os06t0681200-01)
LOC_Os06g47100	Os06g0684900	1.9224	chr06	28547607	28549831	F-box domain, Skp2-like domain containing protein. (Os06t0684900-00)
LOC_Os06g47200	Os06g0686400	1.0154	chr06	28617447	28620310	Bifunctional inhibitor/plant lipid transfer protein/seed storage domain containing protein. (Os06t0686400-01);Bifunctional inhibitor/plant lipid transfer protein/seed storage domain containing protein. (Os06t0686400-02)
LOC_Os06g47270	Os06g0687200	1.03489	chr06	28652793	28654123	Putative RING E3 ubiquitin (Ub) ligase, Negative regulator of drought and salt stress responses, Positive factor of cold stress response (Os06t0687200-01)
LOC_Os06g48020	Os06g0695400	2.04132	chr06	29035686	29038182	Haem peroxidase family protein. (Os06t0695400-01)
LOC_Os06g48210	Os06g0697200	1.17854	chr06	29163800	29166676	DEAD-box protein abstrakt. (Os06t0697200-00)
LOC_Os06g48240	Os06g0697500	1.52513	chr06	29180264	29181822	ATPase, AAA-type, core domain containing protein. (Os06t0697500-00)
LOC_Os06g49750	Os06g0711700	1.34172	chr06	30092166	30093523	Kelch-type beta propeller domain containing protein. (Os06t0711700-00)
LOC_Os06g50240	Os06g0716200,Os06g0716533	2.25654	#N/A	#N/A	#N/A	#N/A
LOC_Os06g50930	Os06g0725000	1.13691	chr06	30823392	30825734	Similar to Senescence-associated protein DIN1. (Os06t0725000-01)
LOC_Os06g51210	Os06g0727900	1.67897	chr06	30982225	30988361	Domain of unknown function DUF23 domain containing protein. (Os06t0727900-00)
LOC_Os07g01340	Os07g0103500	3.17254	chr07	213778	219543	2OG-Fe(II) oxygenase domain containing protein. (Os07t0103500-01)
LOC_Os07g04560	Os07g0138200	1.51883	chr07	2023158	2025061	NAC transcription factor, ABA-induced leaf senescence and tillering (Os07t0138200-01)
LOC_Os07g05940	Os07g0154100	2.89826	chr07	2870686	2872829	Similar to Viviparous-14. (Os07t0154100-01)
LOC_Os07g07790	Os07g0174400	1.05295	chr07	3910661	3911056	Similar to Non-specific lipid-transfer protein. (Os07t0174400-00)
LOC_Os07g09420	Os07g0192000	1.92865	chr07	4969408	4971145	ATPase, AAA-type, core domain containing protein. (Os07t0192000-01)
LOC_Os07g11100	None	2.39873	#N/A	#N/A	#N/A	#N/A
LOC_Os07g14150	Os07g0245100	1.43252	chr07	8075642	8078200	Similar to Cytosine deaminase (EC 3.5.4.1). (Os07t0245100-01);Similar to cDNA clone:J023115F20, full insert sequence. (Os07t0245100-02)
LOC_Os07g22730	Os07g0410300	2.82281	chr07	12826360	12827317	Conserved hypothetical protein. (Os07t0410300-01)
LOC_Os07g23640	Os07g0418600	1.27706	chr07	13354235	13355291	Proline-rich glycoprotein, ABA-dependent inhibition of root growth (Os07t0418600-01)
LOC_Os07g23660	Os07g0418700	1.37319	chr07	13366416	13367503	Proline-rich glycoprotein, ABA-dependent inhibition of root growth (Os07t0418700-01)
LOC_Os07g25960	None	1.61612	#N/A	#N/A	#N/A	#N/A
LOC_Os07g25970	None	1.48505	#N/A	#N/A	#N/A	#N/A
LOC_Os07g26110	Os07g0442900	1.4613	chr07	14988874	14990789	Uncharacterised protein family UPF0497, trans-membrane plant subgroup domain containing protein. (Os07t0442900-01)
LOC_Os07g26320	None	1.15643	#N/A	#N/A	#N/A	#N/A
LOC_Os07g27370	None	2.25654	#N/A	#N/A	#N/A	#N/A
LOC_Os07g27390	None	3.14826	#N/A	#N/A	#N/A	#N/A
LOC_Os07g31530	None	1.69727	#N/A	#N/A	#N/A	#N/A
LOC_Os07g33440	Os07g0518100	1.93324	chr07	19985763	19987668	Cytochrome P450 (CYP450) protein 716A subfamily, Positive regulation of the resistance response to rice sheath blight (RSB) and bacterial leaf blight (BLB) (Os07t0518100-01)
LOC_Os07g34280	Os07g0526600	2.9147	chr07	20523736	20525356	Alpha/beta hydrolase fold-3 domain containing protein. (Os07t0526600-01)
LOC_Os07g34520	Os07g0529000	2.35486	chr07	20691213	20693521	Similar to Isocitrate lyase (Fragment). (Os07t0529000-01)
LOC_Os07g35300	Os07g0537400	1.07331	chr07	21131097	21132528	Similar to receptor-like serine-threonine protein kinase. (Os07t0537400-01)
LOC_Os07g36630	Os07g0551700	1.52343	chr07	21910226	21915284	Similar to Cellulose synthase (Fragment). (Os07t0551700-01)
LOC_Os07g37210	Os07g0558100	1.00005	chr07	22293736	22295309	Similar to Myb-related transcription factor LBM1. (Os07t0558100-00)
LOC_Os07g37620	Os07g0563400	1.23086	chr07	22543447	22544955	Protein of unknown function DUF761, plant family protein. (Os07t0563400-01)
LOC_Os07g38130	Os07g0568700	1.93682	chr07	22874257	22875705	Polygalacturonase-inhibiting protein, Inhibitor of fungal polygalacturonase, Regulation of floral organ number (Os07t0568700-02)
LOC_Os07g40290	Os07g0592600	1.04852	chr07	24149718	24152074	Indole-3-acetic acid (IAA)-amido synthetase, Auxin signaling and defense signaling in a pathogen-nonspecific manner (Os07t0592600-01)
LOC_Os07g40630	Os07g0597200	1.71469	chr07	24347899	24351836	Protein kinase, core domain containing protein. (Os07t0597200-01);Protein kinase, core domain containing protein. (Os07t0597200-02)
LOC_Os07g42160	Os07g0613000	1.43912	chr07	25225861	25229459	Guanosine-tetraphosphate (ppGpp) synthase, RelA/SpoT Homolog 3b (Os07t0613000-01)
LOC_Os07g42834	Os07g0620600	2.16982	chr07	25652012	25653741	Conserved hypothetical protein. (Os07t0620600-01)
LOC_Os07g43240	Os07g0625400	1.90831	chr07	25904766	25905608	SKP1 component domain containing protein. (Os07t0625400-01)
LOC_Os07g44440	Os07g0638400	2.29855	chr07	26551676	26552939	1 Cys-peroxiredoxin B, Root development (Os07t0638400-01)
LOC_Os07g44850	Os07g0643000	1.63975	chr07	26780049	26781207	Alpha/beta hydrolase fold-3 domain containing protein. (Os07t0643000-01)
LOC_Os07g44910	Os07g0643700	1.33243	chr07	26796193	26797512	Alpha/beta hydrolase fold-3 domain containing protein. (Os07t0643700-01)
LOC_Os07g46950	Os07g0664600	1.62916	chr07	28061378	28063141	Glucose/ribitol dehydrogenase family protein. (Os07t0664600-01);Similar to predicted protein. (Os07t0664600-02)
LOC_Os07g47010	None	1.93432	#N/A	#N/A	#N/A	#N/A
LOC_Os07g47670	Os07g0673900	2.09426	chr07	28484263	28485201	Hypoxia induced protein, Early stage of hypoxia signalling (Os07t0673900-01)
LOC_Os07g48010	Os07g0677100	2.168	chr07	28669498	28671384	Peroxidase. (Os07t0677100-01)
LOC_Os07g48020	Os07g0677200	2.14107	chr07	28673754	28675351	Peroxidase, Negative regulation of rice resistance to blast disease (Os07t0677200-01);Similar to Peroxidase. (Os07t0677200-02)
LOC_Os07g49200	Os07g0692200	1.41042	chr07	29458304	29459301	Uncharacterised protein family UPF0497, trans-membrane plant domain containing protein. (Os07t0692200-00)
LOC_Os08g01480	Os08g0105700	1.70352	chr08	296973	298367	Similar to Bx2-like protein. (Os08t0105700-01)
LOC_Os08g02030	Os08g0112300	3.58982	chr08	655771	657391	Transferase domain containing protein. (Os08t0112300-01)
LOC_Os08g04630	Os08g0141400	1.35674	chr08	2310032	2315261	Similar to mRNA, clone: RTFL01-03-I20. (Os08t0141400-01)
LOC_Os08g07730	Os08g0174300	1.80409	chr08	4325892	4329843	Transferase domain containing protein. (Os08t0174300-00)
LOC_Os08g09750	Os08g0197400	1.02404	chr08	5633346	5636220	F-box domain, cyclin-like domain containing protein. (Os08t0197400-01)
LOC_Os08g22370	None	2.17706	#N/A	#N/A	#N/A	#N/A
LOC_Os08g22380	Os08g0315200	2.7325	chr08	13488426	13495822	Retrotransposon gag protein family protein. (Os08t0315200-01)
LOC_Os08g24630	None	3.15277	#N/A	#N/A	#N/A	#N/A
LOC_Os08g24750	Os08g0334900	2.08908	chr08	14976007	14977932	Xyloglucan fucosyltransferase family protein. (Os08t0334900-01)
LOC_Os08g28710	Os08g0374600,Os08g0374701	1.86728	#N/A	#N/A	#N/A	#N/A
LOC_Os08g30100	Os08g0390700	1.96314	chr08	18508782	18509318	Similar to 2-oxoglutarate-dependent oxygenase. (Os08t0390700-01)
LOC_Os08g31280	Os08g0404900	1.72424	chr08	19340472	19341332	Hypothetical conserved gene. (Os08t0404900-00)
LOC_Os08g34720	Os08g0447000	1.10796	chr08	21818095	21823157	3-phosphoglycerate dehydrogenase 2, Serine biosynthesis (Os08t0447000-01)
LOC_Os08g35160	Os08g0452900	1.49254	chr08	22159610	22161424	Similar to Chaperone protein dnaJ. (Os08t0452900-01)
LOC_Os08g36410	Os08g0467300	1.57528	chr08	22983231	22984794	Clathrin adaptor, phosphoinositide-binding, GAT-like domain containing protein. (Os08t0467300-01)
LOC_Os08g36740	Os08g0471401	1.94131	chr08	23194535	23195275	0
LOC_Os08g36920	Os08g0474000	1.63975	chr08	23353856	23354936	Similar to AP2 domain containing protein RAP2.6 (Fragment). (Os08t0474000-01)
LOC_Os08g37050	None	1.35774	#N/A	#N/A	#N/A	#N/A
LOC_Os08g37470	Os08g0480400	2.01789	chr08	23730714	23732293	Similar to cupin, RmlC-type. (Os08t0480400-01)
LOC_Os08g37874	Os08g0485400	2.23554	chr08	23987970	23996294	Similar to Oxidoreductase. (Os08t0485400-01);Similar to 2-nitropropane dioxygenase-like protein. (Os08t0485400-02)
LOC_Os08g38600	Os08g0494300	1.71794	chr08	24397939	24401324	Copine domain containing protein. (Os08t0494300-01)
LOC_Os08g39660	Os08g0507100	2.29444	chr08	25109674	25111322	Cytochrome P450 family protein. (Os08t0507100-00)
LOC_Os08g39730	Os08g0508000	2.96169	chr08	25155158	25156850	Cytochrome P450 76C6, Regulation of isoproturon (IPU) detoxification (Os08t0508000-01)
LOC_Os08g39840	Os08g0508800	2.31468	chr08	25216460	25224078	Type 2 13-lipoxygenase, Herbivore-induced defense response (Os08t0508800-01)
LOC_Os08g40270	Os08g0514000,Os08g0514066	3.03356	#N/A	#N/A	#N/A	#N/A
LOC_Os08g40290	None	1.99215	#N/A	#N/A	#N/A	#N/A
LOC_Os08g40680	Os08g0518800	3.00702	chr08	25758874	25759533	Similar to Class III chitinase homologue (OsChib3H-h) (Fragment). (Os08t0518800-01)
LOC_Os08g41750	Os08g0529300	3.15921	chr08	26351181	26352296	Hypothetical conserved gene. (Os08t0529300-00)
LOC_Os08g43200	Os08g0545500	2.30454	chr08	27320678	27325475	Similar to Dehydration-responsive element-binding protein 1J. (Os08t0545500-00)
LOC_Os08g43290	Os08g0546300	2.4473	chr08	27364165	27364816	Similar to LTP-like protein. (Os08t0546300-01)
LOC_Os08g44340	Os08g0557600	1.31335	chr08	27899853	27903121	Similar to Monodehydroascorbate reductase (EC 1.6.5.4) (MDAR) (Ascorbate free radical reductase) (AFR reductase). (Os08t0557600-01);Similar to Cytosolic monodehydroascorbate reductase. (Os08t0557600-02)
LOC_Os09g09650	None	1.47503	#N/A	#N/A	#N/A	#N/A
LOC_Os09g15480	Os09g0323500	2.28455	chr09	9476484	9478842	Protein of unknown function DUF833 family protein. (Os09t0323500-01)
LOC_Os09g17152	Os09g0341600	2.22891	chr09	10522954	10524537	Cyclin-like F-box domain containing protein. (Os09t0341600-01)
LOC_Os09g17190	Os09g0342000	1.39192	chr09	10545876	10547371	Cyclin-like F-box domain containing protein. (Os09t0342000-01)
LOC_Os09g21120	Os09g0378700	2.5144	chr09	12746529	12748883	Similar to ubiquitin-protein ligase. (Os09t0378700-00)
LOC_Os09g21710	Os09g0385700	1.68579	chr09	13155093	13155832	AN1-type zinc-finger protein, Chloroplast development (Os09t0385700-01)
LOC_Os09g25430	Os09g0421700	2.49619	chr09	15240448	15242482	Zinc finger, U1-type domain containing protein. (Os09t0421700-01)
LOC_Os09g25700	Os09g0425300	3.09905	chr09	15423515	15424390	Conserved hypothetical protein. (Os09t0425300-00)
LOC_Os09g27040	Os09g0442400	1.04486	chr09	16444342	16447967	t-snare domain containing protein. (Os09t0442400-01)
LOC_Os09g27260	Os09g0444900	1.90998	chr09	16573502	16574893	Similar to plant viral-response family protein. (Os09t0444900-01);Similar to plant viral-response family protein. (Os09t0444900-02)
LOC_Os09g27500	Os09g0447300	1.98472	chr09	16711022	16713794	Cytochrome P450 family protein. (Os09t0447300-01)
LOC_Os09g27510	Os09g0447500	1.33861	chr09	16718633	16720923	Cytochrome P450 family protein. (Os09t0447500-01)
LOC_Os09g27950	Os09g0452900	1.0918	chr09	16980037	16983867	Glycosyl transferase, family 31 protein. (Os09t0452900-01)
LOC_Os09g27990	Os09g0453300	1.76273	chr09	16999461	17001374	Annexin family protein. (Os09t0453300-01);Similar to Fiber annexin. (Os09t0453300-02)
LOC_Os09g28180	Os09g0454900	1.47006	chr09	17092204	17095317	S-Domain receptor like kinase-65, Partial S-domain containing protein, Response to drought and submergence, Target of SUB1A and ERF66 transcription factors, Response to Xanthomonas oryzae pv. oryzae and Rice Stripe Virus (Os09t0454900-01)
LOC_Os09g29940	Os09g0475500	1.13261	chr09	18217457	18221122	Protein of unknown function DUF246, plant family protein. (Os09t0475500-01)
LOC_Os09g30280	Os09g0480400	2.28455	chr09	18441091	18445139	Similar to Glycosyltransferase QUASIMODO1 (EC 2.4.1.-). (Os09t0480400-01)
LOC_Os09g30490	Os09g0482800	2.34464	chr09	18618052	18618753	Ca<sup>2+</sup>-binding protein (Os09t0482800-01)
LOC_Os09g31478	Os09g0491740	1.00089	chr09	18978153	18983471	Auxin efflux carrier domain containing protein. (Os09t0491740-01)
LOC_Os09g32570	Os09g0502500	1.16679	chr09	19443222	19444839	Alcohol dehydrogenase superfamily, zinc-containing protein. (Os09t0502500-01)
LOC_Os09g33530	Os09g0509500	1.05916	chr09	19775385	19780571	Diacylglycerol acyltransferase domain containing protein. (Os09t0509500-00)
LOC_Os09g34160	Os09g0517200	1.81135	chr09	20163094	20167803	Hypothetical conserved gene. (Os09t0517200-00)
LOC_Os09g35010	Os09g0522000	2.4309	chr09	20395279	20396175	Transcription activator, "Tolerance to drought, high-salt and cold stresses" (Os09t0522000-01)
LOC_Os09g35020	Os09g0522100	1.61812	chr09	20399458	20400198	Similar to Dehydration-responsive element-binding protein 1H. (Os09t0522100-00)
LOC_Os09g35780	Os09g0526500	1.70548	chr09	20587554	20588586	C2 calcium/lipid-binding region, CaLB domain containing protein. (Os09t0526500-00)
LOC_Os09g36200	Os09g0532000	1.47793	chr09	20868846	20871077	Senescence-inducible chloroplast protein, Activation of the chlorophll-degrading pathway during leaf senescence (Os09t0532000-01)
LOC_Os09g37200	Os09g0544000	1.33061	chr09	21463619	21465476	Transferase family protein. (Os09t0544000-01)
LOC_Os09g37958	None	1.04084	#N/A	#N/A	#N/A	#N/A
LOC_Os09g39760	Os09g0571100	2.27183	chr09	22804668	22806066	Pectin lyase fold/virulence factor domain containing protein. (Os09t0571100-01)
LOC_Os10g03320	Os10g0122000	1.21089	chr10	1405692	1407206	UDP-glucuronosyl/UDP-glucosyltransferase family protein. (Os10t0122000-00)
LOC_Os10g17489	None	1.45495	#N/A	#N/A	#N/A	#N/A
LOC_Os10g17940	Os10g0326800	1.93761	chr10	9078440	9080094	Conserved hypothetical protein. (Os10t0326800-01)
LOC_Os10g19919	Os10g0340301	2.60138	chr10	9984427	9987827	Conserved hypothetical protein. (Os10t0340301-01)
LOC_Os10g20450	Os10g0344900	2.57565	chr10	10293210	10295890	Multi antimicrobial extrusion protein MatE family protein. (Os10t0344900-01)
LOC_Os10g21590	Os10g0360100	1.0593	chr10	11053048	11057745	Similar to Sugar transporter protein. (Os10t0360100-01);Conserved hypothetical protein. (Os10t0360100-02)
LOC_Os10g25040	Os10g0389300	1.81556	chr10	12890904	12894595	Similar to Red chlorophyll catabolite reductase (Fragment). (Os10t0389300-01);Red chlorophyll catabolite reductase (Os10t0389300-02)
LOC_Os10g25400	Os10g0393800	2.7943	chr10	13131433	13133327	Lipase, GDSL domain containing protein. (Os10t0393800-01)
LOC_Os10g26500	Os10g0404900	1.16353	chr10	13804909	13806731	Similar to HAHB-5 (Fragment). (Os10t0404900-01)
LOC_Os10g28120	Os10g0416800	1.22409	chr10	14602523	14603656	Similar to Chitinase 2 (EC 3.2.1.14) (Tulip bulb chitinase-2) (TBC-2). (Os10t0416800-03)
LOC_Os10g29570	None	1.43673	#N/A	#N/A	#N/A	#N/A
LOC_Os10g30390	Os10g0439800	2.56488	chr10	15796279	15799887	Similar to H0813E03.1 protein. (Os10t0439800-00)
LOC_Os10g30450	Os10g0440500	1.51789	chr10	15827417	15827923	Heavy metal transport/detoxification protein domain containing protein. (Os10t0440500-00)
LOC_Os10g32658	None	1.46803	#N/A	#N/A	#N/A	#N/A
LOC_Os10g33810	Os10g0478300	1.51778	chr10	17923596	17926286	SG2-type MYB transcription factor, Resistance to fungal and bacterial pathogens (Os10t0478300-01)
LOC_Os10g34920	Os10g0490900	1.06378	chr10	18637489	18638521	Similar to Secretory protein. (Os10t0490900-00)
LOC_Os10g35300	Os10g0496000	2.17312	chr10	18873532	18875014	Zinc finger, Dof-type family protein. (Os10t0496000-02)
LOC_Os10g36100	Os10g0504900	1.41075	chr10	19303783	19304325	Similar to Lipid transfer protein. (Os10t0504900-01)
LOC_Os10g36960	Os10g0513400	1.87458	chr10	19804480	19806116	Cytochrome P450 family protein. (Os10t0513400-00)
LOC_Os10g37220	None	2.02452	#N/A	#N/A	#N/A	#N/A
LOC_Os10g37340	Os10g0517500	1.49625	chr10	20001168	20004598	Cystathionine &gamma;-lyase (Os10t0517500-02)
LOC_Os10g37660	Os10g0521000	1.28484	chr10	20154610	20159181	Trehalase, Salt stress tolerance (Os10t0521000-01)
LOC_Os10g37670	Os10g0521100	1.02195	chr10	20160992	20162434	Similar to Actin-depolymerizing factor 6 (ADF-6) (AtADF6). (Os10t0521100-01)
LOC_Os10g38000	Os10g0523900	2.39873	chr10	20355076	20355657	Similar to AP2 domain containing protein. (Os10t0523900-00)
LOC_Os10g38040	Os10g0524300	1.00642	chr10	20374252	20375187	LysM domain-containing protein, Embryo sac development (Os10t0524300-01)
LOC_Os10g38120	Os10g0525200	1.15607	chr10	20426804	20430567	Cytochrome P450 family protein. (Os10t0525200-01)
LOC_Os10g38360	Os10g0527800	1.32476	chr10	20498004	20499096	Glutathione S-transferase, Regulation of leaf senescence (Os10t0527800-01)
LOC_Os10g38470	Os10g0528100	1.88529	chr10	20551209	20552361	Similar to Glutathione S-transferase GST 42 (EC 2.5.1.18) (Fragment). (Os10t0528100-01)
LOC_Os10g40934	Os10g0558700,Os10g0558750	1.05702	#N/A	#N/A	#N/A	#N/A
LOC_Os11g02240	Os11g0113700	1.02034	chr11	630585	633622	Serine/threonine protein kinase, Abiotic stresses (Os11t0113700-01);Serine/threonine protein kinase, Microbe-assosiated molecular pattern (MAMP)-induced defense signaling pathway (Os11t0113700-02)
LOC_Os11g03300	Os11g0126900	1.18334	chr11	1233932	1235977	NAC-domain protein, Drought tolerance (Os11t0126900-01)
LOC_Os11g04560	Os11g0141400	1.08321	chr11	1931458	1932198	Similar to EF hand family protein, expressed. (Os11t0141400-01)
LOC_Os11g06110	Os11g0160000	1.98189	chr11	2907576	2908803	Protein of unknown function DUF241, plant domain containing protein. (Os11t0160000-00)
LOC_Os11g06770	Os11g0168500	1.20353	chr11	3307571	3309567	Hypothetical conserved gene. (Os11t0168500-00)
LOC_Os11g06960	None	1.04646	#N/A	#N/A	#N/A	#N/A
LOC_Os11g10480	Os11g0210300	1.16017	chr11	5712671	5716288	Alcohol dehydrogenase 1. (Os11t0210300-01);Similar to Alcohol dehydrogenase 1. (Os11t0210300-02)
LOC_Os11g10510	Os11g0210500	2.45361	chr11	5745005	5748092	Alcohol dehydrogenase 2, Arsenite uptake via silicate transporters (Os11t0210500-01);Similar to Alcohol dehydrogenase. (Os11t0210500-02)
LOC_Os11g19864	Os11g0303800	1.02931	chr11	11436951	11446262	Hypothetical protein. (Os11t0303800-01)
LOC_Os11g23080	None	1.89448	#N/A	#N/A	#N/A	#N/A
LOC_Os11g24374	Os11g0431700	1.15397	chr11	13890814	13915531	Similar to Serine carboxypeptidase. (Os11t0431700-01)
LOC_Os11g26570	Os11g0451700	3.13273	chr11	15223376	15224746	Similar to Dehydrin DHN1 (M3) (RAB-17 protein). (Os11t0451700-00)
LOC_Os11g26750	Os11g0453900	1.48765	chr11	15320288	15321526	Dehydrin RAB 16D. (Os11t0453900-01)
LOC_Os11g26780	Os11g0454200	4.09202	chr11	15336192	15337158	Dehydrin (Os11t0454200-01)
LOC_Os11g26790	Os11g0454300	3.92988	chr11	15342877	15343671	Group 2 late embryogenesis abundant (LEA) protein, Salt tolerance (Os11t0454300-01)
LOC_Os11g30290	Os11g0495400	2.80887	chr11	17596500	17596895	Similar to PHF5-like protein. (Os11t0495400-00)
LOC_Os11g31530	Os11g0514400	2.58624	chr11	18426136	18428231	Small leucine rich repeat (LRR) protein, Cell elongation activity, Regulation of lamina inclination and grain size (Os11t0514400-01)
LOC_Os11g38160	Os11g0594000	2.23957	chr11	22625530	22627473	Sugar/inositol transporter domain containing protein. (Os11t0594000-01)
LOC_Os11g38890	None	2.2999	#N/A	#N/A	#N/A	#N/A
LOC_Os11g43420	Os11g0655300	1.54637	chr11	26217692	26220753	NB-ARC domain containing protein. (Os11t0655300-01)
LOC_Os11g43760	Os11g0658900	2.62282	chr11	26434011	26438037	Similar to Lipase family protein. (Os11t0658900-01)
LOC_Os11g43790	Os11g0659200	1.20545	chr11	26453228	26453757	Protein of unknown function DUF581 family protein. (Os11t0659200-00)
LOC_Os11g44340	Os11g0664800	1.19742	chr11	26794437	26799952	Hypothetical conserved gene. (Os11t0664800-00)
LOC_Os11g45740	Os11g0684000	1.34774	chr11	27670321	27673334	Myb transcription factor, Jasmonate-dependent defense response, Negative regulation of bacterial blight resistance (Os11t0684000-01)
LOC_Os11g47500	Os11g0700900	1.60874	chr11	28722579	28724062	Glycoside hydrolase, subgroup, catalytic core domain containing protein. (Os11t0700900-01);Class III chitinase homologue (OsChib3H-b). (Os11t0700900-02)
LOC_Os11g47530	Os11g0701200	3.25408	chr11	28733145	28734249	Glycoside hydrolase, family 18 protein. (Os11t0701200-01)
LOC_Os11g47590	Os11g0701900	2.66666	chr11	28755994	28757153	Glycoside hydrolase, family 18 protein. (Os11t0701900-01)
LOC_Os11g47840	Os11g0704800	1.22145	chr11	28853530	28857356	Similar to Membrane protein. (Os11t0704800-01)
LOC_Os12g02060	Os12g0111800	2.27597	chr12	614314	616031	Similar to Class III peroxidase 136. (Os12t0111800-00)
LOC_Os12g03040	Os12g0123700	1.11071	chr12	1139026	1141362	NAC domain containing transcription factor, Abiotic and biotic stress response (Os12t0123700-01)
LOC_Os12g03050	Os12g0123800	2.51646	chr12	1146995	1148742	No apical meristem (NAM) protein domain containing protein. (Os12t0123800-01)
LOC_Os12g04450	None	1.77394	#N/A	#N/A	#N/A	#N/A
LOC_Os12g04890	None	1.46737	#N/A	#N/A	#N/A	#N/A
LOC_Os12g12080	None	1.05995	#N/A	#N/A	#N/A	#N/A
LOC_Os12g13640	Os12g0238900	1.27416	chr12	7665115	7669540	Similar to HGA6. (Os12t0238900-01)
LOC_Os12g15530	Os12g0257600	1.41138	chr12	8869547	8875025	Similar to Laccase-25. (Os12t0257600-00)
LOC_Os12g15680	Os12g0258700	2.00588	chr12	8960777	8964016	Cupredoxin domain containing protein. (Os12t0258700-01)
LOC_Os12g17160	Os12g0270900	1.9256	chr12	9821581	9823929	Sulfotransferase family protein. (Os12t0270900-01);Similar to cDNA clone:J023121F12, full insert sequence. (Os12t0270900-02)
LOC_Os12g18560	Os12g0283400	1.62769	chr12	10732280	10733415	Pectinesterase inhibitor domain containing protein. (Os12t0283400-01)
LOC_Os12g24650	Os12g0434400	1.87863	chr12	14109246	14114260	Similar to predicted protein. (Os12t0434400-00)
LOC_Os12g26290	Os12g0448900	3.10582	chr12	15330237	15340502	Fatty acid alpha-dioxygenase family, Enzyme that oxygenates fatty acids into 2R-hydroperoxides (Os12t0448900-01)
LOC_Os12g27830	Os12g0464400	1.9256	chr12	16398248	16400772	Similar to Oxidoreductase, short chain dehydrogenase/reductase family protein, expressed. (Os12t0464400-01)
LOC_Os12g29400	Os12g0478200	1.79065	chr12	17463398	17465368	Hypothetical protein. (Os12t0478200-01);GRAM domain containing protein. (Os12t0478200-02)
LOC_Os12g30180	Os12g0486900	2.1617	chr12	18116036	18120679	Similar to Protein kinase domain containing protein, expressed. (Os12t0486900-01)
LOC_Os12g30824	Os12g0491800	2.4433	chr12	18509843	18528700	Similar to Ent-kaurene synthase 1A. (Os12t0491800-01)
LOC_Os12g36630	Os12g0552400	1.23317	chr12	22427863	22429178	Rossmann-like alpha/beta/alpha sandwich fold domain containing protein. (Os12t0552400-01)
LOC_Os12g37519	None	2.11254	#N/A	#N/A	#N/A	#N/A
LOC_Os12g37690	Os12g0564100	1.89518	chr12	23135061	23137352	Similar to Myb-like DNA-binding domain containing protein, expressed. (Os12t0564100-01)
LOC_Os12g39400	Os12g0583700	1.58762	chr12	24237377	24238380	TFIIIA-type zinc finger protein, Tolerance to salt and drought stresses (Os12t0583700-01)
LOC_Os12g42200	Os12g0616500	2.53843	chr12	26177081	26179003	Similar to cation proton exchanger. (Os12t0616500-00)
LOC_Os12g42910	Os12g0624200	1.83459	chr12	26669155	26670534	Similar to K-exchanger-like protein. (Os12t0624200-00)
LOC_Os12g43450	Os12g0630200	1.20118	chr12	26960487	26961383	Thaumatin, pathogenesis-related family protein. (Os12t0630200-01)
				Downregulated genes
LOC_Os01g01120	Os01g0101200	-1.19297	chr01	62060	65537	2,3-diketo-5-methylthio-1-phosphopentane phosphatase domain containing protein. (Os01t0101200-01);2,3-diketo-5-methylthio-1-phosphopentane phosphatase domain containing protein. (Os01t0101200-02)
LOC_Os01g02000	Os01g0110100	-1.37225	chr01	537710	543354	Phosphate (Pi) transporter, Pi homeostasis (Os01t0110100-01)
LOC_Os01g02080	Os01g0111100	-1.20752	chr01	586445	587696	Cyclophilin-like domain containing protein. (Os01t0111100-01)
LOC_Os01g02780	Os01g0117200	-2.06172	chr01	969340	973327	Similar to ARK protein (Fragment). (Os01t0117200-01)
LOC_Os01g06310	Os01g0155800	-1.38151	chr01	2999576	3001139	Conserved hypothetical protein. (Os01t0155800-01)
LOC_Os01g08840	Os01g0183900	-2.28159	chr01	4440901	4441368	0
LOC_Os01g12130	Os01g0220700	-1.26522	chr01	6612386	6613717	Similar to predicted protein. (Os01t0220700-00)
LOC_Os01g13120	Os01g0232000	-1.14588	chr01	7297781	7298619	Major intrinsic protein family protein. (Os01t0232000-00)
LOC_Os01g17170	Os01g0279100	-1.01286	chr01	9874379	9876678	Subunit of magnesium-protoporphyrin IX monomethyl ester cyclase (EC:1.14.13.81), Core component of FLU-YGL8-LCAA-POR complex, Chlorophyll biosynthesis, Chloroplast development (Os01t0279100-01);Similar to Magnesium-protoporphyrin ix monomethyl ester cyclase (Fragment). (Os01t0279100-02)
LOC_Os01g19480	Os01g0300900	-2.15806	chr01	11058878	11063872	Galactose oxidase/kelch, beta-propeller domain containing protein. (Os01t0300900-01);Hypothetical conserved gene. (Os01t0300900-02)
LOC_Os01g20720	Os01g0308300	-1.56057	chr01	11526651	11529893	NB-ARC domain containing protein. (Os01t0308300-00)
LOC_Os01g22640	Os01g0329900	-1.21741	chr01	12734098	12738081	Similar to Lipase homolog (Fragment). (Os01t0329900-01);Hypothetical conserved gene. (Os01t0329900-02)
LOC_Os01g24090	Os01g0343500	-1.21216	chr01	13582038	13584915	Similar to TPR repeat. (Os01t0343500-01)
LOC_Os01g26210	Os01g0364400	-1.09066	chr01	14856256	14878542	Protein kinase, catalytic domain domain containing protein. (Os01t0364400-00)
LOC_Os01g26240	Os01g0364400	-1.30288	chr01	14856256	14878542	Protein kinase, catalytic domain domain containing protein. (Os01t0364400-00)
LOC_Os01g26300	Os01g0365000	-1.65702	chr01	14903885	14915751	Protein kinase, catalytic domain domain containing protein. (Os01t0365000-00)
LOC_Os01g31690	Os01g0501800	-1.05831	chr01	17349338	17350785	Similar to Photosystem II oxygen-evolving complex protein 1 (Fragment). (Os01t0501800-01)
LOC_Os01g41710	Os01g0600900	-1.35788	chr01	23607363	23608541	Chlorophyll a-b binding protein 2, chloroplast precursor (LHCII type I CAB-2) (LHCP). (Os01t0600900-02);Similar to Chlorophyll a-b binding protein 2, chloroplastic. (Os01t0600900-03)
LOC_Os01g44970	Os01g0636500	-1.31703	chr01	25513947	25518078	Similar to Polygalacturonase PG2. (Os01t0636500-01)
LOC_Os01g45274	Os01g0639900	-1.2581	chr01	25696671	25705077	beta-carbonic anhydrase (EC:4.2.1.1), Carbon assimilation, CO<sub>2</sub>-mediated stomatal pore response (Os01t0639900-01)
LOC_Os01g47370	Os01g0663051	-1.52409	chr01	27062505	27064276	Similar to SANT/MYB protein. (Os01t0663051-00)
LOC_Os01g47780	Os01g0668100	-2.65665	chr01	27340911	27341950	Similar to Arabinogalactan-like protein. (Os01t0668100-01)
LOC_Os01g47820	Os01g0668600	-1.42978	chr01	27375122	27377698	S-Domain receptor like kinase-12, Response to B. glumae in resistant rice genotype CL 161 (Os01t0668600-00)
LOC_Os01g50080	Os01g0695700	-1.03488	chr01	28768976	28780102	Similar to MDR-like ABC transporter. (Os01t0695700-00)
LOC_Os01g52160	Os01g0719600	-1.10668	chr01	30003535	30005888	Heavy metal transport/detoxification protein domain containing protein. (Os01t0719600-01)
LOC_Os01g53900	Os01g0742200	-1.0337	chr01	30992411	30997180	Similar to Elongation factor EF-2 (Fragment). (Os01t0742200-01)
LOC_Os01g54270	Os01g0746400	-1.24343	chr01	31225458	31228566	Carotenoid cleavage dioxygenase 8, Control of lateral bud outgrowth, Regulation of tillering, Strigolactones biosynthesis (Os01t0746400-01)
LOC_Os01g57410	Os01g0783100	-1.04115	chr01	33182589	33186141	Pentatricopeptide repeat domain containing protein. (Os01t0783100-01)
LOC_Os01g59750	Os01g0813000	-1.01679	chr01	34560768	34564315	Similar to 14 kDa zinc-binding protein. (Os01t0813000-01)
LOC_Os01g61880	Os01g0835500	-1.36724	chr01	35813149	35817706	Similar to Respiratory burst oxidase protein. (Os01t0835500-01);Similar to respiratory burst oxidase protein A. (Os01t0835500-02);Similar to Respiratory burst oxidase-like protein J. (Os01t0835500-03)
LOC_Os01g62200	Os01g0839200	-2.32606	chr01	36002559	36005000	DUF966 family protein, Abiotic stress response (Os01t0839200-01)
LOC_Os01g62490	Os01g0842500	-3.63846	chr01	36177292	36180127	Similar to Laccase (EC 1.10.3.2). (Os01t0842500-01)
LOC_Os01g62980	Os01g0849000	-1.2506	chr01	36484020	36484818	Hypothetical protein. (Os01t0849000-02)
LOC_Os01g63870	Os01g0857500	-1.24421	chr01	37062340	37064615	Xanthine/uracil/vitamin C permease family protein. (Os01t0857500-01)
LOC_Os01g65260	Os01g0873100	-1.04503	chr01	37866113	37866722	Similar to Amidophosphoribosyltransferase, chloroplast precursor (EC 2.4.2.14) (Glutamine phosphoribosylpyrophosphate amidotransferase) (ATASE) (GPAT). (Os01t0873100-01)
LOC_Os01g65880	Os01g0881300	-1.1495	chr01	38254053	38257595	Non-protein coding transcript. (Os01t0881300-01);MtN3 and saliva related transmembrane protein family protein. (Os01t0881300-02)
LOC_Os02g17710	Os02g0277700	-1.31076	chr02	10213163	10216340	Leucine-rich repeat domain containing protein. (Os02t0277700-01)
LOC_Os02g21810	Os02g0323600	-1.35098	chr02	12970223	12972230	Similar to Cytochrome P450-like protein. (Os02t0323600-01)
LOC_Os02g32780	Os02g0529900	-1.18301	chr02	19466313	19469350	Pentatricopeptide repeat domain containing protein. (Os02t0529900-01)
LOC_Os02g33550	Os02g0538700	-2.04831	chr02	19954579	19955654	Harpin-induced 1 domain containing protein. (Os02t0538700-01);Harpin-induced 1 domain containing protein. (Os02t0538700-02)
LOC_Os02g37760	Os02g0590000	-1.24451	chr02	22782750	22783121	Lecithin:cholesterol/phospholipid:diacylglycerol acyltransferase domain containing protein. (Os02t0590000-00)
LOC_Os02g37770	Os02g0590200	-1.37229	chr02	22789881	22791737	Lecithin:cholesterol/phospholipid:diacylglycerol acyltransferase domain containing protein. (Os02t0590200-01)
LOC_Os02g40240	Os02g0615800	-1.12794	chr02	24350730	24354486	Protein kinase, core domain containing protein. (Os02t0615800-01);Hypothetical conserved gene. (Os02t0615800-02)
LOC_Os02g43560	Os02g0652100	-1.03049	chr02	26280287	26283888	Similar to WRKY-like DNA-binding protein. (Os02t0652100-01)
LOC_Os02g43970	Os02g0657000	-1.11031	chr02	26550965	26552002	DREB-like protein, AP2/EREBP-type transcription factor, Drought tolerance, Seed germination, Response to abiotic stress (Os02t0657000-01)
LOC_Os02g47020	Os02g0698000	-1.09693	chr02	28701864	28704291	Similar to Phosphoribulokinase, chloroplast precursor (EC 2.7.1.19) (Phosphopentokinase) (PRKase) (PRK). (Os02t0698000-01);Similar to Phosphoribulokinase, chloroplast precursor (EC 2.7.1.19) (Phosphopentokinase) (PRKase) (PRK). (Os02t0698000-02);Similar to Phosphoribulokinase, chloroplast precursor (EC 2.7.1.19) (Phosphopentokinase) (PRKase) (PRK). (Os02t0698000-03)
LOC_Os02g47420	Os02g0702600	-1.04842	chr02	28953036	28958936	Rop nucleotide exchanger, PRONE domain containing protein. (Os02t0702600-01);Rop nucleotide exchanger, PRONE domain containing protein. (Os02t0702600-02);Similar to predicted protein. (Os02t0702600-03)
LOC_Os02g52930	Os02g0768300	-1.5839	chr02	32359193	32361902	Protein of unknown function DUF6, transmembrane domain containing protein. (Os02t0768300-01)
LOC_Os02g53850	Os02g0779000	-2.18207	chr02	32981274	32983228	Peptidase S8/S53, subtilisin/kexin/sedolisin domain containing protein. (Os02t0779000-00)
LOC_Os02g55870	Os02g0802200	-1.01054	chr02	34199541	34203704	Glycoside hydrolase family 79, N-terminal protein. (Os02t0802200-01)
LOC_Os03g02190	Os03g0113000	-1.04768	chr03	732488	734247	Serine/threonine protein kinase domain containing protein. (Os03t0113000-01);Serine/threonine protein kinase domain containing protein. (Os03t0113000-02)
LOC_Os03g02690	Os03g0118600	-1.05364	chr03	1004328	1007269	Similar to Dihydrodipicolinate reductase-like protein. (Os03t0118600-01);Similar to dihydrodipicolinate reductase. (Os03t0118600-02)
LOC_Os03g03600	Os03g0128000	-1.89365	chr03	1579382	1580910	FAS1 domain domain containing protein. (Os03t0128000-01);Similar to Fasciclin-like protein FLA2. (Os03t0128000-02)
LOC_Os03g03790	Os03g0130100	-1.65015	chr03	1706053	1708135	Similar to Acyl-activating enzyme 11. (Os03t0130100-01)
LOC_Os03g11110	Os03g0209500	-1.06994	chr03	5710240	5715009	Zinc finger, DHHC-type domain containing protein. (Os03t0209500-01)
LOC_Os03g11160	Os03g0210000	-1.24322	chr03	5749954	5750298	Putative cysteine proteinase inhibitor 9. (Os03t0210000-00)
LOC_Os03g12660	Os03g0227700	-1.4079	chr03	6737549	6744486	Cytochrome P450 90B2, Brassinosteroid C-22 hydroxylase, Brassinosteroids biosynthesis (Os03t0227700-01)
LOC_Os03g18060	None	-2.37302	#N/A	#N/A	#N/A	#N/A
LOC_Os03g19990	Os03g0314500	-1.91954	chr03	11266821	11270098	WD40-like Beta Propeller domain containing protein. (Os03t0314500-01);Hypothetical conserved gene. (Os03t0314500-02)
LOC_Os03g20700	Os03g0323200	-1.22985	chr03	11712280	11719587	Similar to Magnesium-chelatase subunit H family protein, expressed. (Os03t0323200-01);Similar to Magnesium-chelatase subunit H family protein, expressed. (Os03t0323200-02);Similar to Magnesium-chelatase subunit H family protein, expressed. (Os03t0323200-03);Magnesium chelatase subunit ChlH, Chlorophyll biosynthesis (Os03t0323200-04)
LOC_Os03g22634	Os03g0348200	-1.40693	chr03	13063312	13070842	Terpene synthase-like domain containing protein. (Os03t0348200-00)
LOC_Os03g24590	Os03g0360600	-1.08019	chr03	14006157	14007356	Mitochodrial transcription termination factor-related family protein. (Os03t0360600-00)
LOC_Os03g30420	Os03g0417700	-1.45127	chr03	17340417	17342284	Similar to Phytochrome P450. (Os03t0417700-01);Cytochrome P450 paralogue, Promotion of grain growth (Os03t0417700-02)
LOC_Os03g36530	Os03g0563100	-1.69306	chr03	20240367	20243969	D-arabinono-1,4-lactone oxidase domain containing protein. (Os03t0563100-01)
LOC_Os03g39610	Os03g0592500	-1.08346	chr03	22000043	22001240	Similar to Photosystem II type II chlorophyll a/b binding protein (Fragment). (Os03t0592500-01);Similar to Chloroplast chlorophyll a-b binding protein (Fragment). (Os03t0592500-02)
LOC_Os03g45450	Os03g0657400	-1.40377	chr03	25651039	25651556	Hypothetical conserved gene. (Os03t0657400-00)
LOC_Os03g56930	Os03g0782200	-1.19321	chr03	32423241	32424487	Hypothetical protein. (Os03t0782200-01)
LOC_Os03g56950	Os03g0782500	-1.06106	chr03	32432551	32435839	Phytochrome-interacting factor-like bHLH protein, Stress-responsive transcription factor, Regulator of reduced internode elongation under drought conditions (Os03t0782500-01)
LOC_Os03g57149	Os03g0785200	-1.17166	chr03	32590198	32591451	Mitochodrial transcription termination factor-related family protein. (Os03t0785200-01)
LOC_Os03g59240	Os03g0807100	-1.16413	chr03	33731566	33734958	Protein of unknown function DUF239 domain containing protein. (Os03t0807100-01)
LOC_Os03g61040	Os03g0825600	-1.12917	chr03	34674979	34676923	Hypothetical conserved gene. (Os03t0825600-01);Conserved hypothetical protein. (Os03t0825600-02)
LOC_Os04g02850	Os04g0118700	-1.05238	chr04	1110678	1113347	Pentatricopeptide repeat domain containing protein. (Os04t0118700-00)
LOC_Os04g11195	None	-1.00358	#N/A	#N/A	#N/A	#N/A
LOC_Os04g11970	Os04g0196200	-1.01596	chr04	6564647	6566873	Acetyl-serotonin methyltransferase, Melatonin biosynthesis (Os04t0196200-01)
LOC_Os04g14260	None	-2.31047	#N/A	#N/A	#N/A	#N/A
LOC_Os04g14280	None	-1.38211	#N/A	#N/A	#N/A	#N/A
LOC_Os04g15920	Os04g0229100	-1.50247	chr04	8637314	8639345	Similar to Sinapyl alcohol dehydrogenase. (Os04t0229100-01)
LOC_Os04g21350	Os04g0282400	-1.09621	chr04	12062977	12063828	Homologue of Arabidopsis flowering-promoting factor 1, AtFPF1, Modulation of root and flower development, Control of auxin accumulation, Modulation of ROS homeostasis (Os04t0282400-01)
LOC_Os04g28990	Os04g0359100	-1.7121	chr04	17180207	17183428	Alcohol dehydrogenase superfamily, zinc-containing protein. (Os04t0359100-01)
LOC_Os04g29580	Os04g0365100	-1.09669	chr04	17584989	17589580	Similar to OSIGBa0135K14.8 protein. (Os04t0365100-01)
LOC_Os04g29680	Os04g0366000	-1.9359	chr04	17667431	17671131	Similar to OSIGBa0110B10.6 protein. (Os04t0366000-00)
LOC_Os04g29790	None	-1.7073	#N/A	#N/A	#N/A	#N/A
LOC_Os04g29800	None	-1.797	#N/A	#N/A	#N/A	#N/A
LOC_Os04g29960	Os04g0368000	-1.03641	chr04	17874313	17877280	Serine/threonine protein kinase-related domain containing protein. (Os04t0368000-01)
LOC_Os04g30030	Os04g0369000	-1.47715	chr04	17913242	17914650	PapD-like domain containing protein. (Os04t0369000-01)
LOC_Os04g30250	Os04g0371000	-1.025	chr04	18056917	18057576	Four-helical cytokine family protein. (Os04t0371000-00)
LOC_Os04g33660	Os04g0412500	-1.30471	chr04	20388100	20390005	Similar to OSIGBa0134P10.2 protein. (Os04t0412500-01)
LOC_Os04g33830	Os04g0414700	-1.17953	chr04	20496054	20497009	Photosystem I PsaO domain containing protein. (Os04t0414700-01)
LOC_Os04g34490	Os04g0422300	-1.99573	chr04	20882277	20885593	Protein of unknown function DUF6, transmembrane domain containing protein. (Os04t0422300-01)
LOC_Os04g36720	Os04g0444800	-1.01948	chr04	22182599	22186919	Ferric reductase oxidase, Fe homeostasis, Salt stress response (Os04t0444800-01);Ferric reductase-like transmembrane component family protein. (Os04t0444800-02)
LOC_Os04g38410	Os04g0457000	-1.4171	chr04	22835913	22837163	Similar to Chlorophyll a/b-binding protein CP24, photosystem II (Fragment). (Os04t0457000-01)
LOC_Os04g38600	Os04g0459500	-1.23724	chr04	22937162	22939010	Similar to H0219H12.1 protein. (Os04t0459500-01);Similar to GADPH (383 AA) (Fragment). (Os04t0459500-02)
LOC_Os04g39370	None	-1.04537	#N/A	#N/A	#N/A	#N/A
LOC_Os04g43290	Os04g0512300	-2.43253	chr04	25608241	25611089	Arp2/3 complex, 34kDa subunit p34-Arc family protein. (Os04t0512300-01)
LOC_Os04g43400	Os04g0513700	-1.13239	chr04	25672306	25674971	Similar to Beta-glucosidase 16. (Os04t0513700-00)
LOC_Os04g44220	Os04g0523200	-1.16799	chr04	26177249	26179831	Up-frameshift suppressor 2 domain containing protein. (Os04t0523200-01)
LOC_Os04g44330	Os04g0524900	-1.75438	chr04	26253821	26256781	Similar to OSIGBa0153E02-OSIGBa0093I20.16 protein. (Os04t0524900-00)
LOC_Os04g48930	Os04g0578600	-1.38933	chr04	29178862	29181665	Similar to H0404F02.15 protein. (Os04t0578600-01);Ferric reductase oxidase, Iron homeostasis, "Drought, heat, salinity stress response" (Os04t0578600-02)
LOC_Os04g49660	Os04g0586000	-1.05497	chr04	29610157	29611144	Protein of unknown function DUF581 family protein. (Os04t0586000-00)
LOC_Os04g49920	Os04g0588900	-1.06412	chr04	29770168	29773429	0
LOC_Os04g56240	Os04g0657500	-1.07782	chr04	33530289	33533734	Lipase, class 3 family protein. (Os04t0657500-01)
LOC_Os04g58200	Os04g0678700	-1.68939	chr04	34663055	34664559	NADPH:protochlorophyllide oxidoreductase, Chlorophyll biosynthesis (Os04t0678700-01)
LOC_Os05g02550	Os05g0116300	-2.10905	chr05	885036	886004	0
LOC_Os05g03120	Os05g0122600	-1.33565	chr05	1240299	1245253	Prefoldin domain containing protein. (Os05t0122600-01);Similar to Rid2 protein (Fragment). (Os05t0122600-02)
LOC_Os05g06920	Os05g0161500	-1.11677	chr05	3626394	3629080	Calcium-activated (p)ppGpp synthetase, Ca<sup>2+</sup>-activated RelA-SpoT homolog 2 (Os05t0161500-01)
LOC_Os05g11210	Os05g0201700	-2.109	chr05	6333107	6333718	Hypothetical conserved gene. (Os05t0201700-00)
LOC_Os05g11650	Os05g0206600	-1.23428	chr05	6606005	6606262	Non-protein coding transcript. (Os05t0206600-00)
LOC_Os05g12640	Os05g0217800	-2.09935	chr05	7255510	7257163	BURP domain containing protein. (Os05t0217800-01);Similar to BURP domain-containing protein 2. (Os05t0217800-02)
LOC_Os05g22614	Os05g0291700	-1.29654	chr05	12833493	12839420	Similar to PTAC16 (PLASTID TRANSCRIPTIONALLY ACTIVE18); binding / catalytic. (Os05t0291700-01);Similar to cDNA clone:002-143-C11, full insert sequence. (Os05t0291700-02);NAD(P)-binding domain containing protein. (Os05t0291700-03)
LOC_Os05g23830	Os05g0304000	-1.30495	chr05	13697790	13698128	0
LOC_Os05g24520	None	-1.09718	#N/A	#N/A	#N/A	#N/A
LOC_Os05g25370	Os05g0317900	-1.30935	chr05	14725926	14735830	Catharanthus roseus receptor-like kinase1-like kinase, Regulation of flowering time signaling pathway and/or circadian rhythms (Os05t0317900-01)
LOC_Os05g28120	None	-1.08001	#N/A	#N/A	#N/A	#N/A
LOC_Os05g28830	Os05g0356700	-3.67305	chr05	16897434	16899135	Protein of unknown function DUF231, plant domain containing protein. (Os05t0356700-01)
LOC_Os05g30220	Os05g0365300	-1.16429	chr05	17512767	17517933	Nucleotide-binding site leucine-rich repeat (NBS-LRR) protein, Bacterial blight resistance (Os05t0365300-01);Similar to NBS-LRR-like protein (Fragment). (Os05t0365300-02)
LOC_Os05g34170	Os05g0413200	-1.55148	chr05	20204138	20207282	Beta-tubulin , Responseto gebberellin (GA) and brassinolide (BL) (Os05t0413200-01)
LOC_Os05g38790	Os05g0463300	-1.41464	chr05	22756240	22758478	Hypothetical conserved gene. (Os05t0463300-00)
LOC_Os05g43340	None	-1.42932	#N/A	#N/A	#N/A	#N/A
LOC_Os05g46610	Os05g0543600	-1.72831	chr05	26987460	26989035	R2R3-type MYB transcription factor, Regulation of the development of secondary cell wall (Os05t0543600-01)
LOC_Os05g48270	Os05g0556400	-1.46097	chr05	27666328	27669347	DOMON related domain containing protein. (Os05t0556400-01)
LOC_Os05g48900	Os05g0563600	-1.48903	chr05	28051758	28052859	FAS1 domain domain containing protein. (Os05t0563600-01)
LOC_Os05g49320	Os05g0568300	-1.14462	chr05	28299369	28300093	Similar to 50S ribosomal protein L12, chloroplast precursor (CL12). (Os05t0568300-00)
LOC_Os05g50300	Os05g0579200	-2.11824	chr05	28829948	28832127	AMP-dependent synthetase and ligase domain containing protein. (Os05t0579200-01)
LOC_Os05g50340	Os05g0579600	-1.05056	chr05	28845110	28846124	Homeodomain-like containing protein. (Os05t0579600-01)
LOC_Os06g04920	Os06g0141200	-1.22705	chr06	2162738	2165150	Putative zinc finger protein, Negative regulation of salt stress response (Os06t0141200-01)
LOC_Os06g06250	Os06g0156600	-1.39986	chr06	2893694	2895804	Lipase, GDSL domain containing protein. (Os06t0156600-01)
LOC_Os06g07790	Os06g0174800	-1.33618	chr06	3781226	3782897	Conserved hypothetical protein. (Os06t0174800-00)
LOC_Os06g08120	Os06g0179500	-1.11651	chr06	3941687	3943447	Protein of unknown function DUF247, plant family protein. (Os06t0179500-00)
LOC_Os06g08900	Os06g0188700	-1.21416	chr06	4481240	4487783	Similar to Glutamate receptor. (Os06t0188700-00)
LOC_Os06g12310	Os06g0228200	-1.14481	chr06	6648404	6653002	Aquaporin NIP III subfamily protein, Aquaporin, Silicon influx transporter, Water transport (Os06t0228200-01);Similar to NOD26-like membrane integral protein. (Os06t0228200-03)
LOC_Os06g12450	Os06g0229800	-2.37302	chr06	6748398	6753302	Soluble starch synthase II-3, Endosperm starch synthesis, Determination of the type of amylopectin structure of starch grain (Os06t0229800-01)
LOC_Os06g15330	Os06g0264200	-1.15491	chr06	8704831	8706949	CONSTANS-like protein, Transcription factor, Repression of flowering, Regulation of plant height and grain yield (Os06t0264200-01)
LOC_Os06g15630	None	-1.61791	#N/A	#N/A	#N/A	#N/A
LOC_Os06g16640	Os06g0278000	-1.14525	chr06	9564356	9566944	Glucoamylase, putatuve domain containing protein. (Os06t0278000-00)
LOC_Os06g19260	Os06g0296700	-1.1082	chr06	10957733	10960700	C-type lectin, conserved site domain containing protein. (Os06t0296700-01)
LOC_Os06g21570	Os06g0320200	-1.01616	chr06	12437683	12442790	Similar to OSIGBa0135C13.7 protein. (Os06t0320200-01);Glycosyl hydrolase family 1 (GH1) beta-glucosidase, Seed germination, Root elongation, Drought tolerance (Os06t0320200-02)
LOC_Os06g24850	Os06g0355300	-1.06815	chr06	14577762	14580200	Similar to Auxin-responsive protein IAA22. (Os06t0355300-01)
LOC_Os06g32890	None	-1.40096	#N/A	#N/A	#N/A	#N/A
LOC_Os06g32900	None	-1.78345	#N/A	#N/A	#N/A	#N/A
LOC_Os06g32910	Os06g0520733	-1.43975	chr06	19157238	19158412	Similar to cell number regulator 4. (Os06t0520733-00)
LOC_Os06g34400	Os06g0534900	-1.04811	chr06	20019320	20019976	Hypothetical conserved gene. (Os06t0534900-00)
LOC_Os06g40170	Os06g0604200	-1.04012	chr06	23908918	23913796	Chloroplast-localized phospholipase D, Herbivore defense (Os06t0604200-02)
LOC_Os06g40940	Os06g0611900	-1.01847	chr06	24399546	24404035	Similar to Glycine decarboxylase P subunit. (Os06t0611900-01);Similar to Victorin binding protein. (Os06t0611900-02)
LOC_Os06g48560	Os06g0699100	-1.34699	chr06	29381137	29382336	Transferase domain containing protein. (Os06t0699100-00)
LOC_Os07g01620	Os07g0106900	-1.54513	chr07	383519	384235	Plant disease resistance response protein family protein. (Os07t0106900-01)
LOC_Os07g02140	Os07g0112100	-1.13037	chr07	685467	687222	Similar to J023132I08, full insert sequence. (Os07t0112100-00)
LOC_Os07g08350	Os07g0181100	-2.33807	chr07	4283646	4287282	C4-dicarboxylate transporter/malic acid transport protein family protein. (Os07t0181100-01)
LOC_Os07g11330	Os07g0213800	-1.15708	chr07	6244163	6244880	Similar to Allergenic protein. (Os07t0213800-01)
LOC_Os07g19140	None	-1.26632	#N/A	#N/A	#N/A	#N/A
LOC_Os07g28000	None	-1.3852	#N/A	#N/A	#N/A	#N/A
LOC_Os07g31960	Os07g0502900	-1.31642	chr07	19008024	19009668	UDP-glucuronosyl/UDP-glucosyltransferase family protein. (Os07t0502900-00)
LOC_Os07g34070	Os07g0524900	-1.01498	chr07	20365632	20367832	Protein of unknown function DUF6, transmembrane domain containing protein. (Os07t0524900-01)
LOC_Os07g34830	Os07g0532500	-1.57118	chr07	20874271	20876723	Ankyrin repeat containing protein. (Os07t0532500-01);Hypothetical conserved gene. (Os07t0532500-02)
LOC_Os07g37240	Os07g0558400	-1.08541	chr07	22316343	22317935	Similar to Chlorophyll a/b-binding protein CP29 precursor. (Os07t0558400-01)
LOC_Os07g41320	Os07g0604400	-1.81468	chr07	24755706	24758207	Similar to COBRA-like protein 6. (Os07t0604400-00)
LOC_Os07g43560	Os07g0628700	-1.0556	chr07	26052222	26055831	Similar to Receptor protein kinase. (Os07t0628700-01)
LOC_Os07g43810	Os07g0631900	-1.08508	chr07	26211749	26213842	Nucleotide-binding, alpha-beta plait domain containing protein. (Os07t0631900-01);Non-protein coding transcript. (Os07t0631900-02)
LOC_Os07g48980	Os07g0689600	-1.24969	chr07	29323098	29324607	Nicotianamine synthase 3, Mitigation of excess Fe stress, Fe detoxification, Transport of iron (Os07t0689600-01)
LOC_Os08g01160	Os08g0101900	-1.11032	chr08	108447	109106	UPF0497 membrane protein 2. (Os08t0101900-00)
LOC_Os08g03630	Os08g0130400	-1.37135	chr08	1716498	1719881	AMP-dependent synthetase/ligase domain containing protein. (Os08t0130400-01)
LOC_Os08g05010	None	-1.50728	#N/A	#N/A	#N/A	#N/A
LOC_Os08g06280	Os08g0159500	-1.05704	chr08	3460765	3463758	C2C2-type zinc finger protein, Promotion of seed germination, Modulation of gibberellin biosynthesis, Regulation of cell death and callus differentiation (Os08t0159500-01);Similar to LOL1. (Os08t0159500-02)
LOC_Os08g07890	Os08g0176200	-1.02062	chr08	4445655	4447532	Serine/threonine protein kinase-related domain containing protein. (Os08t0176200-01)
LOC_Os08g16580	Os08g0266400	-1.20334	chr08	10142326	10144699	Leucine-rich repeat, N-terminal domain containing protein. (Os08t0266400-00)
LOC_Os08g19750	None	-1.48082	#N/A	#N/A	#N/A	#N/A
LOC_Os08g28670	Os08g0374000	-1.18194	chr08	17510752	17511689	Bet v I allergen family protein. (Os08t0374000-01)
LOC_Os08g28790	Os08g0375400	-1.19083	chr08	17613571	17614371	Plant disease resistance response protein family protein. (Os08t0375400-01)
LOC_Os08g30590	Os08g0396500	-1.14151	chr08	18849616	18852819	Hypothetical conserved gene. (Os08t0396500-01)
LOC_Os08g37940	Os08g0485900	-1.33162	chr08	24023544	24027173	Haloacid dehalogenase-like hydrolase domain containing protein. (Os08t0485900-01)
LOC_Os08g38020	Os08g0487100	-1.4583	chr08	24083101	24084735	Similar to BZIP transcription factor BZI-2. (Os08t0487100-01)
LOC_Os08g38400	Os08g0492000	-1.1654	chr08	24311145	24314816	Similar to Glutathione transporter. (Os08t0492000-01)
LOC_Os08g41630	Os08g0528000	-1.28534	chr08	26287796	26291466	Peptidase C19, ubiquitin carboxyl-terminal hydrolase 2 family protein. (Os08t0528000-00)
LOC_Os09g03380	Os09g0121100	-1.33537	chr09	1659226	1659549	0
LOC_Os09g13650	Os09g0307300	-2.79756	chr09	7964048	7967912	Targeting for Xklp2 family protein. (Os09t0307300-01);Similar to Microtubule-associated protein. (Os09t0307300-02)
LOC_Os09g16950	Os09g0339000	-1.18475	chr09	10365056	10368262	Protein kinase, core domain containing protein. (Os09t0339000-01)
LOC_Os09g19229	Os09g0356800	-1.17998	chr09	11483617	11506480	Protein kinase, core domain containing protein. (Os09t0356800-01)
LOC_Os09g19290	None	-1.21339	#N/A	#N/A	#N/A	#N/A
LOC_Os09g19300	None	-1.26026	#N/A	#N/A	#N/A	#N/A
LOC_Os09g19380	None	-2.66338	#N/A	#N/A	#N/A	#N/A
LOC_Os09g19390	None	-3.95567	#N/A	#N/A	#N/A	#N/A
LOC_Os09g19400	Os09g0358700	-2.91122	chr09	11611266	11616750	Carbohydrate-binding malectin-like domain-containing protein, Drought tolerance, NADPH oxidase-mediated ROS production (Os09t0358700-01)
LOC_Os09g20330	Os09g0368850	-1.89424	chr09	12196141	12197683	Annexin, Calcium-dependent lipid binding protein, Negative regulation of osmotic stress tolerance (Os09t0368850-01)
LOC_Os09g20880	Os09g0375600	-1.11601	chr09	12565503	12567065	Similar to Protein kinase family protein. (Os09t0375600-01)
LOC_Os09g25060	Os09g0417600	-2.19977	chr09	14976197	14977729	WRKY transcription factor, Transcriptional repressor, Pathogen defense, Alkali tolerance at the germination stage (Os09t0417600-01);WRKY transcription factor 76. (Os09t0417600-02);Splicing variant of OsWRKY76, Pathogen defense (Os09t0417600-03);Splicing variant of OsWRKY76, Pathogen defense (Os09t0417600-04)
LOC_Os09g27890	Os09g0452200	-1.16316	chr09	16958544	16962140	Lysin motif-containing protein, Pattern recognition receptor, Peptidoglycan and chitin perception in innate immunity (Os09t0452200-01);Similar to LysM-domain GPI-anchored protein 1 precursor. Splice isoform 2. (Os09t0452200-02)
LOC_Os09g29540	Os09g0471500	-1.37282	chr09	17968402	17971304	Conserved hypothetical protein. (Os09t0471500-01)
LOC_Os09g30130	Os09g0478300	-1.15358	chr09	18316004	18322383	Similar to Cellulose synthase-like protein E6. (Os09t0478300-01)
LOC_Os09g31502	Os09g0491820	-1.05979	chr09	19011720	19014197	NAD(P)-binding domain containing protein. (Os09t0491820-01);Similar to dihydroflavonol-4-reductase. (Os09t0491820-02)
LOC_Os09g35940	Os09g0528700	-1.42482	chr09	20691369	20693116	Similar to Cytochrome p450 (CYP78A9). (Os09t0528700-00)
LOC_Os09g39050	Os09g0563950	-2.17339	chr09	22418846	22420093	Cyclin-like F-box domain containing protein. (Os09t0563950-00)
LOC_Os10g01044	Os10g0100300	-1.19126	chr10	46031	58278	NAD(P)-binding domain containing protein. (Os10t0100300-01)
LOC_Os10g04730	Os10g0136500	-1.13413	chr10	2257492	2262619	GnK2 domain containing receptor-like kinase-8, Response to chilling stress in tolerant rice genotype Volano, Response to Xanthomonas oryzae pv. oryzae in resistant rice genotype IRBB21 (Os10t0136500-01)
LOC_Os10g05120	None	-1.27529	#N/A	#N/A	#N/A	#N/A
LOC_Os10g05490	Os10g0144700	-1.35569	chr10	2709163	2711992	Cytochrome P450 domain containing protein. (Os10t0144700-00)
LOC_Os10g06560	None	-1.79035	#N/A	#N/A	#N/A	#N/A
LOC_Os10g10180	Os10g0181600	-1.15668	chr10	5592943	5595558	Methyltransferase type 11 domain containing protein. (Os10t0181600-01);Similar to CMV 1a interacting protein 1. (Os10t0181600-02)
LOC_Os10g35030	Os10g0492300	-1.05988	chr10	18687994	18693376	Similar to IAP100. (Os10t0492300-01)
LOC_Os10g35840	Os10g0502400	-1.29323	chr10	19159179	19162398	Glutamyl-tRNA reductase, Rice homolog of Arabidopsis GluTR (Os10t0502400-01);Similar to Glutamyl-tRNA reductase. (Os10t0502400-02)
LOC_Os10g35950	Os10g0503300	-1.09902	chr10	19214959	19215235	Similar to 10-deacetylbaccatin III 10-O-acetyltransferase. (Os10t0503300-00)
LOC_Os10g36500	Os10g0508700	-1.07899	chr10	19530118	19532281	Pectinesterase inhibitor domain containing protein. (Os10t0508700-01)
LOC_Os10g37700	None	-1.03106	#N/A	#N/A	#N/A	#N/A
LOC_Os10g38540	Os10g0528900	-1.77094	chr10	20574829	20576053	Similar to Tau class GST protein 3. (Os10t0528900-01)
LOC_Os10g38800	Os10g0531700	-2.28238	chr10	20652467	20654875	Serine/threonine protein kinase-related domain containing protein. (Os10t0531700-00)
LOC_Os10g40520	Os10g0552700	-1.18237	chr10	21693876	21694502	Similar to Tumor-related protein (Fragment). (Os10t0552700-01)
LOC_Os10g40810	Os10g0557600	-1.05615	chr10	21943291	21945186	GATA transcription factor, Brassinosteroids-mediated growth regulation, panicle development and grain shape/number/weight/yield (Os10t0557600-01)
LOC_Os11g01240	Os11g0103400	-1.72319	chr11	136630	139200	Similar to IBR domain containing protein. (Os11t0103400-00)
LOC_Os11g02540	Os11g0117600	-2.75365	chr11	793116	795608	WRKY transcription factor 50, Transcription repressor, Mediation of ABA-dependent seed germination and seedling growth, Salt stress tolerance (Os11t0117600-01)
LOC_Os11g05010	Os11g0147500	-1.18452	chr11	2168334	2171145	Heavy metal transport/detoxification protein domain containing protein. (Os11t0147500-01);Heavy metal transport/detoxification protein domain containing protein. (Os11t0147500-02)
LOC_Os11g07020	Os11g0171300	-1.05247	chr11	3488768	3491609	Fructose-bisphosphate aldolase, chloroplast precursor (EC 4.1.2.13) (ALDP). (Os11t0171300-01)
LOC_Os11g08020	Os11g0182900	-1.45238	chr11	4168279	4170029	Ankyrin repeat domain containing protein. (Os11t0182900-00)
LOC_Os11g11330	Os11g0220300	-1.04285	chr11	6285765	6287989	Similar to NB-ARC domain containing protein, expressed. (Os11t0220300-01)
LOC_Os11g12310	None	-1.96898	#N/A	#N/A	#N/A	#N/A
LOC_Os11g13890	Os11g0242800	-1.21859	chr11	7659701	7662180	Light-harvesting complex II protein, Light-dependent rice blast resistance (Os11t0242800-01)
LOC_Os11g16550	Os11g0267000	-1.46643	chr11	9177329	9178565	Regulator of the Magnesium-chelatase subunit ChlH activity, Activation of the ChlH subunit of magnesium chelatase, Chlorophyll synthesis (Os11t0267000-02);GUN4-like domain containing protein. (Os11t0267000-03)
LOC_Os11g35960	None	-1.08858	#N/A	#N/A	#N/A	#N/A
LOC_Os11g36000	Os11g0567800	-3.13764	chr11	21156776	21159062	Leucine-rich repeat-containing N-terminal, type 2 domain containing protein. (Os11t0567800-01)
LOC_Os11g43590	Os11g0657000	-1.06942	chr11	26299857	26305695	Kelch repeat type 2 domain containing protein. (Os11t0657000-01)
LOC_Os11g46000	Os11g0687200	-2.67417	chr11	27841513	27846793	Hypothetical conserved gene. (Os11t0687200-01);von Willebrand factor, type A domain containing protein. (Os11t0687200-02);Hypothetical conserved gene. (Os11t0687200-03)
LOC_Os11g46810	Os11g0690600	-2.48972	chr11	28091241	28091624	0
LOC_Os11g47000	None	-2.0689	#N/A	#N/A	#N/A	#N/A
LOC_Os11g47210	Os11g0694850	-1.61648	chr11	28399360	28402773	Leucine-rich repeat (LRR) receptor kinase-like protein, Bacterial blight resistance (Os11t0694850-01)
LOC_Os11g47220	None	-1.84752	#N/A	#N/A	#N/A	#N/A
LOC_Os11g47240	Os11g0695000	-1.14759	chr11	28407554	28411141	Leucine-rich-repeat receptor kinase EXS precursor, Xa26 homolog, Bacterial blight (BB) resistance (Os11t0695000-01)
LOC_Os12g02470	Os12g0116800	-2.8858	chr12	836516	838755	WRKY transcription factor, Bacterial blight disease resistance, Bakanae disease resistance (Os12t0116800-01)
LOC_Os12g08760	Os12g0189300	-1.23579	chr12	4499739	4503902	Pyruvate/Phosphoenolpyruvate kinase, catalytic core domain containing protein. (Os12t0189300-01);Non-protein coding transcript. (Os12t0189300-02)
LOC_Os12g09720	Os12g0199000	-1.1515	chr12	5132646	5135246	Similar to Jasmonate-induced protein. (Os12t0199000-00)
LOC_Os12g12390	None	-1.11221	#N/A	#N/A	#N/A	#N/A
LOC_Os12g16520	None	-1.05155	#N/A	#N/A	#N/A	#N/A
LOC_Os12g24320	Os12g0431100	-1.4296	chr12	13879364	13881474	ATPase, AAA-type, core domain containing protein. (Os12t0431100-01)
LOC_Os12g27254	Os12g0458100	-2.62364	chr12	15998272	16005479	Transferase family protein. (Os12t0458100-01)
LOC_Os12g36870	Os12g0555400	-1.40857	chr12	22597827	22598994	Similar to Raffinose synthase protein. (Os12t0555400-01)
LOC_Os12g37840	Os12g0566000	-1.00164	chr12	23248824	23253304	Similar to Boron transporter. (Os12t0566000-01);Boron (B) transporter, Boron uptake and xylem loading (Os12t0566000-02);Similar to Boron transporter. (Os12t0566000-03)
