# Supplementary material for: Codon Usage Provide Insights into the Adaptation of Rice Genes under Stress Condition
Source: Int J Mol Sci. 2023 Jan 6;24(2):1098. doi: 10.3390/ijms24021098 (PMC9861248; doi:10.3390/ijms24021098)
Supplement: Supplementary file 1 [file ijms-24-01098-s001.zip › Supplementary Table S5(abiotic).xlsx]

## Sheet: Abiotic stress
Supplementary Table S5: Nucleotide composition, CAI and ENC in the genes expressed under abiotic stress conditions
Downregulated												Upregulated
Expression level	Locus_ID	log2 fold change	%AT	%GC	GC content	%GC 1	%GC 2	%GC3	CAI	ENC		Expression level	Locus_ID	log2 fold change	%AT	%GC	GC content	%GC 1	%GC2	%GC3	CAI	ENC
Low	LOC_Os01g08840	-1.61	30.5556	69.4444	High	72.4359	46.7949	89.1026	0.898	32.7		Low	LOC_Os01g03330	1.94	31.1538	68.8462	High	58.0769	59.6154	88.8462	0.908	35
	LOC_Os01g47780	-1.45	29.9731	70.0269	High	62.5	51.2097	96.371	0.918	31.5			LOC_Os01g04330	1.3	29.1209	70.8791	High	68.6813	48.3516	95.6044	0.938	32
	LOC_Os01g62200	-1.45	30.6634	69.3366	High	62.8641	55.8252	89.3204	0.887	34.8			LOC_Os01g37750	1.48	25.498	74.502	High	74.1036	53.3865	96.0159	0.908	31.6
	LOC_Os02g33550	-1.19	28.5926	71.4074	High	69.3333	48.8889	96	0.922	28.8			LOC_Os01g50410	1.33	32.9646	67.0354	High	67.2566	52.2124	81.6372	0.865	43.1
	LOC_Os02g43970	-1.65	26.2537	73.7463	High	67.2566	61.0619	92.9204	0.916	31.6			LOC_Os01g51690	1.58	33.1978	66.8022	High	61.7886	56.0976	82.5203	0.882	39.2
	LOC_Os02g52930	-1.19	35.4978	64.5022	High	59.7403	42.8571	90.9091	0.905	35.3			LOC_Os01g55940	1.11	31.4905	68.5095	High	62.439	45.8537	97.2358	0.926	30.1
	LOC_Os03g03790	-1.31	29.6488	70.3512	High	66.8394	46.6321	97.582	0.938	29.3			LOC_Os01g57230	1.43	31.8687	68.1313	High	62.4242	48.1818	93.7879	0.907	33.9
	LOC_Os03g24590	-1.13	23.0684	76.9316	High	75.4967	56.2914	99.0066	0.923	29.4			LOC_Os01g64790	1.18	26.0417	73.9583	High	65.3409	63.6364	92.8977	0.898	32.4
	LOC_Os03g45800	-1.25	21.8487	78.1513	High	79.8319	57.9832	96.6387	0.898	29.1			LOC_Os01g74370	1.82	38.5811	61.4189	High	58.6006	48.9796	76.6764	0.876	43.9
	LOC_Os03g57149	-1.66	29.3676	70.6324	High	67.2026	46.3023	98.3923	0.937	27.2			LOC_Os02g21920	1.62	30.0654	69.9346	High	64.0523	53.5948	92.1569	0.917	31.7
	LOC_Os03g61040	-1.78	26.4507	73.5493	High	75.5061	52.0243	93.1174	0.916	31.7			LOC_Os02g26430	1.95	30.1837	69.8163	High	64.9606	59.8425	84.6457	0.879	36.6
	LOC_Os05g02550	-1.4	29.7735	70.2265	High	64.0777	56.9579	89.644	0.9	31.9			LOC_Os02g48850	1.74	27.662	72.338	High	71.875	57.2917	87.8472	0.881	35.7
	LOC_Os05g48900	-1.64	29.1819	70.8181	High	61.1722	52.7473	98.5348	0.927	30			LOC_Os02g52210	1.2	32.8778	67.1222	High	64.2369	53.303	83.8269	0.862	41
	LOC_Os05g12640	-1.11	29.1667	70.8333	High	66.3194	53.4722	92.7083	0.915	31.4			LOC_Os03g09910	1.29	38.7755	61.2245	High	59.1837	46.4853	78.0045	0.846	42.7
	LOC_Os05g49320	-1.4	27.2222	72.7778	High	70.5556	52.2222	95.5556	0.931	26.5			LOC_Os03g32230	1.5	29.4118	70.5882	High	62.4434	57.4661	91.8552	0.905	34.9
	LOC_Os05g38790	-1.83	33.0241	66.9759	High	73.4694	54.1744	73.2839	0.831	46.5			LOC_Os03g41390	1.17	27.0572	72.9428	High	69.0377	58.9958	90.795	0.899	32.8
	LOC_Os04g49660	-1.07	33.3333	66.6667	High	60.1562	49.2188	90.625	0.916	32.7			LOC_Os03g52370	1.4	36.2179	63.7821	High	60.5769	48.0769	82.6923	0.888	34.3
	LOC_Os01g20720	-1.05	56.6759	43.3241	Low	51.2488	37.2803	41.4431	0.728	54.5			LOC_Os03g64260	1.6	32.5959	67.4041	High	68.5841	53.0973	80.531	0.867	38.4
	LOC_Os01g24090	-1.81	43.7262	56.2738	Low	61.2167	51.3308	56.2738	0.775	51			LOC_Os04g49360	1.72	30.4348	69.5652	High	73.43	64.2512	71.0145	0.809	48.1
	LOC_Os01g26210	-1.15	60.381	39.619	Low	46.0952	35.0476	37.7143	0.727	53.9			LOC_Os05g46760	1.82	32.6546	67.3454	High	65.3846	52.0362	84.6154	0.864	41.5
	LOC_Os01g26240	-1.31	54.2645	45.7355	Low	49.8826	40.8451	46.4789	0.754	55.2			LOC_Os05g48810	1.14	34.5271	65.4729	High	58.6777	44.3526	93.3884	0.915	34
	LOC_Os01g26300	-1.4	60.5364	39.4636	Low	49.6552	35.1724	33.5632	0.703	55.2			LOC_Os06g47200	1.42	35.5408	64.4592	High	52.9801	58.2781	82.1192	0.867	38
	LOC_Os01g52070	-1.8	43.7149	56.2851	Low	53.0303	40.2357	75.5892	0.84	47.7			LOC_Os07g22730	1.8	26.8769	73.1231	High	67.1171	61.2613	90.991	0.882	32.5
	LOC_Os02g17000	-1.59	43.8632	56.1368	Low	57.1429	45.674	65.5936	0.804	55.7			LOC_Os07g40290	1.44	32.1232	67.8768	High	62.3762	45.2145	96.0396	0.934	30
	LOC_Os02g32610	-1.15	46.5473	53.4527	Low	56.6496	47.5703	56.1381	0.783	57			LOC_Os01g04050	1.21	44.5545	55.4455	Low	44.5545	41.5842	80.198	0.879	38
	LOC_Os02g47020	-1.74	51.4026	48.5974	Low	52.7228	39.8515	53.2178	0.783	49.9			LOC_Os01g36790	1.95	44.4277	55.5723	Low	56.9277	46.5361	63.253	0.81	52.1
	LOC_Os04g11195	-1.97	45.1477	54.8523	Low	50.6329	46.8354	67.0886	0.813	53.1			LOC_Os02g51350	1.52	51.2881	48.7119	Low	50.1171	47.3068	48.7119	0.743	57.6
	LOC_Os04g14260	-1.29	47.6119	52.3881	Low	58.6567	42.2388	56.2687	0.776	58.7			LOC_Os03g10800	1.08	49.3949	50.6051	Low	50.6601	40.264	60.8911	0.81	54.9
	LOC_Os04g43290	-1.07	46.5221	53.4779	Low	46.0705	42.0054	72.3577	0.841	46.7			LOC_Os07g35300	1.57	45.7571	54.2429	Low	54.0765	47.0882	61.5641	0.796	55.5
	LOC_Os04g43400	-1.65	41.2541	58.7459	Low	58.0858	46.5347	71.6172	0.831	48.4			LOC_Os04g30260	1.31	52.9927	47.0073	Low	49.3431	41.0219	50.6569	0.748	58.1
Intermediate	LOC_Os03g45450	-2.98	31.7673	68.2327	High	64.4295	56.3758	83.8926	0.885	38.3		Intermediate	LOC_Os01g09100	2.08	29.5455	70.4545	High	61.3636	59.5455	90.4545	0.89	34.8
	LOC_Os04g39370	-2.11	35.6009	64.3991	High	70.7483	42.8571	79.5918	0.85	41.4			LOC_Os01g09700	2.87	34.2466	65.7534	High	61.4481	47.5538	88.2583	0.891	38.1
	LOC_Os08g30590	-2.62	36.2796	63.7204	High	63.2582	50.6066	77.2964	0.861	43.7			LOC_Os01g50400	2.41	33.4924	66.5076	High	66.3484	51.79	81.3842	0.863	41.1
	LOC_Os09g25060	-2.19	29.2683	70.7317	High	64.0244	53.9634	94.2073	0.922	31.6			LOC_Os01g53260	2.01	34.3791	65.6209	High	65.098	43.5294	88.2353	0.894	32.6
	LOC_Os09g37958	-2.44	27.8119	72.1881	High	73.0061	52.1472	91.411	0.899	34.7			LOC_Os01g62980	2.47	28.8515	71.1485	High	64.7059	56.3025	92.437	0.899	29.7
	LOC_Os10g36500	-2.15	26.5116	73.4884	High	64.186	60.9302	95.3488	0.902	31.8			LOC_Os01g72530	2.71	32.8947	67.1053	High	65.7895	43.4211	92.1053	0.901	30.1
	LOC_Os12g24320	-2.08	34.9237	65.0763	High	60.3053	41.6031	93.3206	0.918	30.2			LOC_Os02g32140	2.4	21.5837	78.4163	High	77.7778	65.9004	91.5709	0.891	34.6
	LOC_Os07g37240	-2.23	30.8133	69.1867	High	61.8557	47.7663	97.9381	0.928	29.7			LOC_Os02g45780	2.15	26.8687	73.1313	High	73.3333	51.5152	94.5455	0.917	33.2
	LOC_Os08g01160	-2.02	34.0336	65.9664	High	59.6639	51.2605	86.9748	0.884	35.8			LOC_Os02g46180	2.22	30.6122	69.3878	High	60.5442	52.381	95.2381	0.937	32.3
	LOC_Os08g30590	-2.62	36.2796	63.7204	High	63.2582	50.6066	77.2964	0.861	43.7			LOC_Os02g52670	2.86	27.4348	72.5652	High	66.6667	58.0247	93.0041	0.915	31.4
	LOC_Os02g21810	-2.36	38.3498	61.6502	High	63.7624	41.7822	79.4059	0.85	44.5			LOC_Os03g48750	2.26	33.4795	66.5205	High	62.7193	43.8596	92.9825	0.907	32.1
	LOC_Os02g37760	-2.51	36.2259	63.7741	High	58.6777	53.3058	79.3388	0.861	41.5			LOC_Os03g56010	2.32	25.9036	74.0964	High	73.494	55.4217	93.3735	0.894	29.8
	LOC_Os02g40240	-2.07	57.2522	42.7478	High	48.3034	38.3234	41.6168	0.723	54.9			LOC_Os03g57960	2.28	31.564	68.436	High	63.9066	47.1338	94.2675	0.919	33.1
	LOC_Os02g46100	-2.28	24.7368	75.2632	High	71.5789	58.4211	95.7895	0.928	30.8			LOC_Os05g29810	2.47	24.9581	75.0419	High	71.8593	60.3015	92.9648	0.918	28.3
	LOC_Os02g53850	-2.77	36.3512	63.6488	High	61.7284	52.4005	76.8176	0.851	43.1			LOC_Os05g51680	2.53	39.1391	60.8609	High	55.8559	47.1471	79.5796	0.862	44.6
	LOC_Os03g02190	-2.79	26.0659	73.9341	High	74.7093	51.1628	95.9302	0.919	30.5			LOC_Os06g47270	2.89	31.4716	68.5284	High	71.2766	43.3511	90.9574	0.914	36.3
	LOC_Os03g03600	-2.74	32.4212	67.5788	High	60.6965	46.5174	95.5224	0.909	32.1			LOC_Os10g17940	2.95	31.25	68.75	High	63.75	52.5	90	0.905	34.4
	LOC_Os03g11160	-2.98	31.5942	68.4058	High	63.4783	46.087	95.6522	0.932	29.5			LOC_Os11g30290	2.6	25.641	74.359	High	66.1538	66.1538	90.7692	0.918	38.4
	LOC_Os04g29790	-2.76	48.659	51.341	Low	53.6398	48.659	51.7241	0.764	51.3			LOC_Os01g24710	2.38	50	50	Low	53.4247	45.2055	51.3699	0.795	48.9
	LOC_Os09g29540	-2.2	55.9477	44.0523	Low	52.9412	33.3333	45.8824	0.739	54.1			LOC_Os01g45640	2.84	48.855	51.145	Low	51.145	48.855	53.4351	0.766	57.5
	LOC_Os11g02540	-2.89	42.8283	57.1717	Low	51.5152	53.0303	66.9697	0.83	52.1			LOC_Os02g09830	2.53	50.0975	49.9025	Low	56.1404	40.3509	53.2164	0.802	46.2
	LOC_Os10g05490	-2.23	40.6331	59.3669	Low	63.7597	44.9612	69.3798	0.802	51.5			LOC_Os02g43560	2.1	43.6842	56.3158	Low	54.2105	49.4737	65.2632	0.817	49.9
	LOC_Os08g05010	-2.03	44.9937	55.0063	Low	56.2738	56.2738	52.4715	0.777	52.3			LOC_Os03g56060	2.42	51.9651	48.0349	Low	50.655	32.7511	60.6987	0.799	56.9
	LOC_Os08g16580	-2.61	49.9783	50.0217	Low	47.5943	43.303	59.1678	0.791	58.2			LOC_Os03g58764	2.06	49.0539	50.9461	Low	53.5662	44.1048	55.1674	0.783	58.2
	LOC_Os08g28670	-2.9	43.4211	56.5789	Low	58.5526	40.7895	70.3947	0.832	44.8			LOC_Os05g04700	2.89	47.3118	52.6882	Low	45.1613	37.6344	75.2688	0.867	45.9
	LOC_Os08g37940	-2.91	44.2051	55.7949	Low	60	47.6923	59.6923	0.787	55.8			LOC_Os06g47100	2.74	43.0315	56.9685	Low	57.8035	37.7649	75.3372	0.86	45.4
	LOC_Os02g17710	-2.14	58.5327	41.4673	Low	45.1356	39.5534	39.7129	0.721	54			LOC_Os08g09750	2.04	50.1812	49.8188	Low	52.3551	39.8551	57.2464	0.804	55.8
	LOC_Os02g32780	-2.42	49.8308	50.1692	Low	52.9188	44.4162	53.1726	0.768	57.7			LOC_Os09g25430	2.25	42.9585	57.0415	Low	54.1033	46.8085	70.2128	0.843	53.2
	LOC_Os01g02780	-2.47	54.0055	45.9945	Low	47.9282	40.3315	49.7238	0.766	55.8			LOC_Os11g24374	2.77	46.3621	53.6379	Low	52.0305	41.3706	67.5127	0.823	52.1
	LOC_Os02g37770	-2.02	45.614	54.386	Low	57.193	41.7544	64.2105	0.808	49.3			LOC_Os11g47840	2.57	49.3333	50.6667	Low	54.9333	43.7333	53.3333	0.745	57
High	LOC_Os01g42790	-3.03	28.8889	71.1111	High	65.2778	55.2778	92.7778	0.915	34.1		High	LOC_Os01g28840	6.03	34.1853	65.8147	High	61.6613	46.8051	88.9776	0.902	35.5
	LOC_Os01g74300	-4.55	36.214	63.786	High	38.2716	71.6049	81.4815	0.882	48.1			LOC_Os01g62190	3.96	29.2636	70.7364	High	65.6977	55.2326	91.2791	0.872	31.9
	LOC_Os02g53130	-3.49	32.1348	67.8652	High	62.0225	46.7416	94.8315	0.923	30.9			LOC_Os01g63980	3.03	36.87	63.13	High	58.6207	48.2759	82.4934	0.869	41.9
	LOC_Os04g37520	-3.49	30.775	69.225	High	60.2709	50.3386	97.0655	0.918	31.5			LOC_Os03g48770	3.59	35.0877	64.9123	High	62.2807	42.1053	90.3509	0.903	32.9
	LOC_Os05g11210	-3.84	23.0392	76.9608	High	74.0196	61.2745	95.5882	0.913	30.2			LOC_Os04g34970	3.99	23.2653	76.7347	High	71.0204	67.7551	91.4286	0.885	35.2
	LOC_Os05g50300	-3.52	31.1282	68.8718	High	68	51.5385	87.0769	0.88	36.9			LOC_Os05g33130	4.18	26.5885	73.4115	High	60.7038	60.9971	98.5337	0.924	30.6
	LOC_Os05g50340	-3.78	34.4322	65.5678	High	61.5385	38.4615	96.7033	0.937	30.2			LOC_Os05g50570	3.11	30.3505	69.6495	High	66.6667	51.2304	91.0515	0.897	35.4
	LOC_Os07g11330	-3.25	37.6812	62.3188	High	63.354	49.0683	74.5342	0.817	50.4			LOC_Os06g35960	4.59	27.957	72.043	High	69.1756	53.0466	93.9068	0.914	32.6
	LOC_Os09g16950	-3.43	38.3623	61.6377	High	63.4429	50.0967	71.3733	0.832	47.8			LOC_Os08g36410	3.45	28.6314	71.3686	High	70.0252	48.6146	95.466	0.907	31.5
	LOC_Os09g35020	-3.16	25.776	74.224	High	67.6113	60.3239	94.7368	0.905	30.3			LOC_Os08g41750	3.37	33.5125	66.4875	High	64.5161	49.1935	85.7527	0.882	36.3
	LOC_Os09g35940	-3.79	29.4224	70.5776	High	70.7581	51.083	89.8917	0.878	36.9			LOC_Os10g28120	3.02	33.7947	66.2053	High	58.8235	42.9066	96.8858	0.946	29.3
	LOC_Os09g39050	-3.51	34.2147	65.7853	High	59.375	51.2019	86.7789	0.884	39.3			LOC_Os11g43790	4.04	32.2296	67.7704	High	58.2781	59.6026	85.4305	0.897	32.8
	LOC_Os10g40520	-4.44	29.3333	70.6667	High	65.6	49.6	96.8	0.938	30.6			LOC_Os12g29400	5.8	28.0936	71.9064	High	65.5518	55.5184	94.6488	0.911	31.5
	LOC_Os10g40810	-3.62	27.5773	72.4227	High	64.1753	61.0825	92.0103	0.905	32.8			LOC_Os01g03720	3.07	34.8528	65.1472	High	57.5499	50.7123	87.1795	0.894	38
	LOC_Os01g63870	-3.15	55.7854	44.2146	Low	50.3448	45.0575	37.2414	0.693	54.3			LOC_Os01g06560	5.61	28.3951	71.6049	High	68.8889	50.7407	95.1852	0.928	30.8
	LOC_Os02g49340	-4.09	44.6886	55.3114	Low	40.6593	50.5495	74.7253	0.875	43.3			LOC_Os01g06740	3.98	32.1555	67.8445	High	62.5442	45.583	95.4064	0.923	32
	LOC_Os04g29580	-4.19	55.914	44.086	Low	47.4839	41.2903	43.4839	0.736	57.3			LOC_Os01g12580	4.23	30.7018	69.2982	High	63.8158	44.7368	99.3421	0.938	30
	LOC_Os01g47370	-3.65	44.2029	55.7971	Low	50	43.4783	73.913	0.88	44.5			LOC_Os01g16920	3.76	23.8292	76.1708	High	73.5537	60.7438	94.2149	0.904	30.7
	LOC_Os01g52160	-5.62	44.5221	55.4779	Low	58.042	33.5664	74.8252	0.834	41.5			LOC_Os01g24820	4.56	44.2745	55.7255	Low	60.2353	42	64.9412	0.808	54.2
	LOC_Os11g36000	-6.41	55.8373	44.1627	Low	45.1664	41.3629	45.9588	0.736	57.1			LOC_Os02g16940	3.17	47.1467	52.8533	Low	55.9783	45.788	56.7935	0.779	57.8
	LOC_Os11g47210	-3.3	54.8241	45.1759	Low	49.3757	38.5925	47.5596	0.747	56.3			LOC_Os03g17790	4.66	40.6061	59.3939	Low	58.1818	34.5455	85.4545	0.869	36.2
	LOC_Os12g09720	-3.27	51.6088	48.3912	Low	52.8957	38.9961	53.2818	0.753	59.9			LOC_Os03g20550	3.15	52.1327	47.8673	Low	47.3934	47.8673	48.3412	0.784	61
	LOC_Os11g08020	-4.32	43.3594	56.6406	Low	57.0312	46.2891	66.6016	0.809	52.5			LOC_Os03g50490	3.29	40.8805	59.1195	Low	56.8733	45.5526	74.9326	0.856	45.8
	LOC_Os07g43560	-3.71	46.3127	53.6873	Low	53.5398	45.1327	62.3894	0.799	54.7			LOC_Os05g03130	7.33	43.6364	56.3636	Low	56.3636	32.7273	80	0.867	42.3
	LOC_Os06g04920	-4.76	42.9224	57.0776	Low	55.4794	53.4247	62.3288	0.814	46.5			LOC_Os09g09650	4.22	59.9537	40.0463	Low	45.8333	29.8611	44.4444	0.711	55.3
	LOC_Os05g25370	-3.5	54.8997	45.1003	Low	48.17	42.0307	45.1003	0.751	56.1			LOC_Os11g02240	3.17	55.0958	44.9042	Low	48.5057	33.7931	52.4138	0.765	55.6
	LOC_Os04g29680	-3.78	56.6028	43.3972	Low	49.6318	41.5317	39.028	0.717	54.9			LOC_Os11g19864	4.61	53.3333	46.6667	Low	55.1724	44.5977	40.2299	0.731	51.2
	LOC_Os04g29960	-3.22	49.1892	50.8108	Low	51.7568	42.027	58.6487	0.784	56.4			LOC_Os01g12430	4.94	44.665	55.335	Low	54.4665	45.7816	65.7568	0.805	55.5
													LOC_Os01g12660	4.22	53.8644	46.1356	Low	53.151	39.0012	46.2545	0.74	56.3
													LOC_Os01g12820	3.78	40.4834	59.5166	Low	53.7764	50.4532	74.3202	0.846	47.9
