# Supplementary material for: Codon Usage Provide Insights into the Adaptation of Rice Genes under Stress Condition
Source: Int J Mol Sci. 2023 Jan 6;24(2):1098. doi: 10.3390/ijms24021098 (PMC9861248; doi:10.3390/ijms24021098)
Supplement: Supplementary file 1 [file ijms-24-01098-s001.zip › Supplementary Table S6(biotic).xlsx]

## Sheet: Biotic
Supplementary Table S6: Nucleotide composition, CAI and ENC in the genes expressed under biotic stress
Downregulated												Upregulated
Expression level	Locus_ID	log2 fold change	%AT	%GC	GC content	%GC 1	%GC 2	%GC 3	CAI	ENC		Expression level	Locus_ID	log2 fold change	%AT	%GC	GC content	%GC 1	%GC 2	%GC3	CAI	ENC
Low	LOC_Os02g43970	-1.11	26.2537	73.7463	High	67.2566	61.0619	92.9204	0.916	31.6		Low	LOC_Os01g03330	1.08	31.1538	68.8462	High	58.0769	59.6154	88.8462	0.908	35
	LOC_Os02g52930	-1.58	35.4978	64.5022	High	59.7403	42.8571	90.9091	0.905	35.3			LOC_Os01g03360	1.86	32.4183	67.5817	High	56.8627	55.2941	90.5882	0.911	34
	LOC_Os03g02190	-1.05	26.0659	73.9341	High	74.7093	51.1628	95.9302	0.919	30.5			LOC_Os01g04330	1.24	29.1209	70.8791	High	68.6813	48.3516	95.6044	0.938	32
	LOC_Os03g03600	-1.89	32.4212	67.5788	High	60.6965	46.5174	95.5224	0.909	32.1			LOC_Os01g09100	1.1	29.5455	70.4545	High	61.3636	59.5455	90.4545	0.89	34.8
	LOC_Os03g03790	-1.65	29.6488	70.3512	High	66.8394	46.6321	97.582	0.938	29.3			LOC_Os01g16450	1.2	31.8974	68.1026	High	58.4615	49.8462	96	0.916	30.8
	LOC_Os03g12660	-1.41	38.593	61.407	High	58.5799	42.2091	83.432	0.858	41.5			LOC_Os01g28840	1.48	34.1853	65.8147	High	61.6613	46.8051	88.9776	0.902	35.5
	LOC_Os03g19990	-1.92	38.2581	61.7419	High	58.0027	45.0068	82.2161	0.888	39.9			LOC_Os01g37200	1.82	37.5758	62.4242	High	61.8182	63.6364	61.8182	0.804	61
	LOC_Os03g24590	-1.08	23.0684	76.9316	High	75.4967	56.2914	99.0066	0.923	29.4			LOC_Os01g37810	1.72	29.2308	70.7692	High	59.2308	62.3077	90.7692	0.896	34.6
	LOC_Os03g30420	-1.45	27.7132	72.2868	High	72.2868	50.3876	94.186	0.917	32.3			LOC_Os01g42790	1.45	28.8889	71.1111	High	65.2778	55.2778	92.7778	0.915	34.1
	LOC_Os03g45450	-1.4	31.7673	68.2327	High	64.4295	56.3758	83.8926	0.885	38.3			LOC_Os01g48446	1.22	32.8751	67.1249	High	60.8247	56.701	83.8488	0.873	41
	LOC_Os03g57149	-1.17	29.3676	70.6324	High	67.2026	46.3023	98.3923	0.937	27.2			LOC_Os01g50910	1.57	30.0926	69.9074	High	64.3519	54.6296	90.7407	0.919	27.4
	LOC_Os03g61040	-1.13	26.4507	73.5493	High	75.5061	52.0243	93.1174	0.916	31.7			LOC_Os01g53260	1.4	34.3791	65.6209	High	65.098	43.5294	88.2353	0.894	32.6
	LOC_Os04g49660	-1.05	33.3333	66.6667	High	60.1562	49.2188	90.625	0.916	32.7			LOC_Os01g55940	1.61	31.4905	68.5095	High	62.439	45.8537	97.2358	0.926	30.1
	LOC_Os04g29800	-1.8	60.1726	39.8274	Low	48.3354	37.1147	34.0321	0.717	50.9			LOC_Os01g58960	1.66	36.6732	63.3268	High	58.9391	43.4185	87.6228	0.891	40
	LOC_Os02g43560	-1.03	43.6842	56.3158	Low	54.2105	49.4737	65.2632	0.817	49.9			LOC_Os01g59100	1.16	30.2902	69.7098	High	69.0021	49.4692	90.6582	0.903	36.3
	LOC_Os02g47020	-1.1	51.4026	48.5974	Low	52.7228	39.8515	53.2178	0.783	49.9			LOC_Os01g62190	1.72	29.2636	70.7364	High	65.6977	55.2326	91.2791	0.872	31.9
	LOC_Os02g47420	-1.05	50.9804	49.0196	Low	52.5735	40.625	53.8603	0.78	54			LOC_Os01g63980	1.23	36.87	63.13	High	58.6207	48.2759	82.4934	0.869	41.9
	LOC_Os02g55870	-1.01	46.187	53.813	Low	54.9815	44.8339	61.6236	0.811	53.3			LOC_Os01g64790	1.41	26.0417	73.9583	High	65.3409	63.6364	92.8977	0.898	32.4
	LOC_Os03g02690	-1.05	55.3571	44.6429	Low	50	41.0714	42.8571	0.736	53.1			LOC_Os01g72530	1.8	32.8947	67.1053	High	65.7895	43.4211	92.1053	0.901	30.1
	LOC_Os03g11110	-1.07	52.532	47.468	Low	50.9182	45.9098	45.576	0.746	53.8			LOC_Os01g74370	1.49	38.5811	61.4189	High	58.6006	48.9796	76.6764	0.876	43.9
	LOC_Os04g11195	-1	45.1477	54.8523	Low	50.6329	46.8354	67.0886	0.813	53.1			LOC_Os02g21920	1.03	30.0654	69.9346	High	64.0523	53.5948	92.1569	0.917	31.7
	LOC_Os04g28990	-1.71	37.8378	62.1622	Low	61.2613	45.9459	79.2793	0.86	43.4			LOC_Os02g26430	1.78	30.1837	69.8163	High	64.9606	59.8425	84.6457	0.879	36.6
	LOC_Os04g29580	-1.1	55.914	44.086	Low	47.4839	41.2903	43.4839	0.736	57.3			LOC_Os01g04050	1.04	44.5545	55.4455	Low	44.5545	41.5842	80.198	0.879	38
	LOC_Os04g29680	-1.94	56.6028	43.3972	Low	49.6318	41.5317	39.028	0.717	54.9			LOC_Os01g24710	1.34	50	50	Low	53.4247	45.2055	51.3699	0.795	48.9
	LOC_Os04g29790	-1.71	48.659	51.341	Low	53.6398	48.659	51.7241	0.764	51.3			LOC_Os01g24820	1.78	44.2745	55.7255	Low	60.2353	42	64.9412	0.808	54.2
	LOC_Os04g29960	-1.04	49.1892	50.8108	Low	51.7568	42.027	58.6486	0.784	56.4			LOC_Os01g45640	1.98	48.855	51.145	Low	51.145	48.855	53.4351	0.766	57.5
	LOC_Os04g30030	-1.48	53.4483	46.5517	Low	53.2328	35.7759	50.6466	0.755	59.9			LOC_Os01g46570	1.6	54.5605	45.4395	Low	55.058	39.4693	41.791	0.723	55
	LOC_Os04g30250	-1.03	41.9697	58.0303	Low	52.7273	47.7273	73.6364	0.814	47.9			LOC_Os01g47300	1.49	47.3389	52.6611	Low	52.9412	57.1429	47.8992	0.745	54.2
	LOC_Os04g33660	-1.3	43.7276	56.2724	Low	53.7634	42.2939	72.7599	0.853	46.7			LOC_Os02g05550	1.47	58.3704	41.6296	Low	48.6222	36.9778	39.2889	0.733	48.9
	LOC_Os05g24520	-1.1	57.7822	42.2178	Low	46.0922	35.0701	45.491	0.748	50.6			LOC_Os02g09830	1.07	50.0975	49.9025	Low	56.1404	40.3509	53.2164	0.802	46.2
Intermediate	LOC_Os01g08840	-2.28	30.5556	69.4444	High	72.4359	46.7949	89.1026	0.898	32.7		Intermediate	LOC_Os01g31370	2.25	33.5196	66.4804	High	66.108	44.5065	88.8268	0.899	35.2
	LOC_Os01g19480	-2.16	39.84	60.16	High	64.32	48.64	67.52	0.822	49.7			LOC_Os01g50400	2.38	33.4924	66.5076	High	66.3484	51.79	81.3842	0.863	41.1
	LOC_Os01g47780	-2.66	29.9731	70.0269	High	62.5	51.2097	96.371	0.918	31.5			LOC_Os01g50410	2.78	32.9646	67.0354	High	67.2566	52.2124	81.6372	0.865	43.1
	LOC_Os01g62200	-2.33	30.6634	69.3366	High	62.8641	55.8252	89.3204	0.887	34.8			LOC_Os01g51690	2.97	33.1978	66.8022	High	61.7886	56.0976	82.5203	0.882	39.2
	LOC_Os02g33550	-2.05	28.5926	71.4074	High	69.3333	48.8889	96	0.922	28.8			LOC_Os01g72270	2.52	30.1818	69.8182	High	68.5455	48.7273	92.1818	0.904	33.4
	LOC_Os02g53850	-2.18	36.3512	63.6488	High	61.7284	52.4005	76.8176	0.851	43.1			LOC_Os02g45420	2.41	28.7532	71.2468	High	68.7023	62.9771	82.0611	0.871	41.8
	LOC_Os05g02550	-2.11	29.7735	70.2265	High	64.0777	56.9579	89.644	0.9	31.9			LOC_Os02g45780	2.95	26.8687	73.1313	High	73.3333	51.5152	94.5455	0.917	33.2
	LOC_Os05g11210	-2.11	23.0392	76.9608	High	74.0196	61.2745	95.5882	0.913	30.2			LOC_Os02g46180	2.99	30.6122	69.3878	High	60.5442	52.381	95.2381	0.937	32.3
	LOC_Os05g12640	-2.1	29.1667	70.8333	High	66.3194	53.4722	92.7083	0.915	31.4			LOC_Os02g48850	2.47	27.662	72.338	High	71.875	57.2917	87.8472	0.881	35.7
	LOC_Os05g50300	-2.12	31.1282	68.8718	High	68	51.5385	87.0769	0.88	36.9			LOC_Os03g16030	2.4	33.5391	66.4609	High	57.4074	43.2099	98.7654	0.954	27.3
	LOC_Os06g12450	-2.37	36.4982	63.5018	High	67.201	46.7324	76.5721	0.852	45.7			LOC_Os03g41390	2.34	27.0572	72.9428	High	69.0377	58.9958	90.795	0.899	32.8
	LOC_Os07g08350	-2.34	34.08	65.92	High	62.24	50.88	84.64	0.885	39.7			LOC_Os03g45800	2.3	21.8487	78.1513	High	79.8319	57.9832	96.6387	0.898	29.1
	LOC_Os09g25060	-2.2	29.2683	70.7317	High	64.0244	53.9634	94.2073	0.922	31.6			LOC_Os03g61360	2.47	32.1534	67.8466	High	64.8968	43.9528	94.6903	0.93	32.6
	LOC_Os09g39050	-2.17	34.2147	65.7853	High	59.375	51.2019	86.7788	0.884	39.3			LOC_Os04g37770	2.22	18.4343	81.5657	High	75.7576	75.7576	93.1818	0.895	31.1
	LOC_Os10g38800	-2.28	35.0353	64.9647	High	61.2702	47.6961	85.9278	0.889	37.9			LOC_Os05g51680	2.26	39.1391	60.8609	High	55.8559	47.1471	79.5796	0.862	44.6
	LOC_Os11g46000	-2.67	36.5609	63.4391	High	63.9399	43.2387	83.1386	0.871	41.8			LOC_Os07g22730	2.82	26.8769	73.1231	High	67.1171	61.2613	90.991	0.882	32.5
	LOC_Os11g46810	-2.49	48.6175	51.3825	Low	53.6866	41.7051	58.7558	0.78	57.5			LOC_Os08g43290	2.45	28.0702	71.9298	High	61.0526	60	94.7368	0.916	27.2
	LOC_Os11g47000	-2.07	54.2582	45.7418	Low	50.7984	38.523	47.9042	0.744	56.4			LOC_Os09g30490	2.34	31.401	68.599	High	71.7391	40.5797	93.4783	0.926	31.8
	LOC_Os12g02470	-2.89	42.2027	57.7973	Low	52.924	54.6784	65.7895	0.82	52.5			LOC_Os11g30290	2.81	25.641	74.359	High	66.1538	66.1538	90.7692	0.918	38.4
	LOC_Os12g27254	-2.62	50.261	49.739	Low	54.5861	40.7159	53.915	0.764	59.9			LOC_Os01g36790	2.4	44.4277	55.5723	Low	56.9277	46.5361	63.253	0.81	52.1
	LOC_Os01g02780	-2.06	54.0055	45.9945	Low	47.9282	40.3315	49.7238	0.766	55.8			LOC_Os01g47290	2.14	45.1754	54.8246	Low	59.8684	48.0263	56.5789	0.766	46.8
	LOC_Os03g18060	-2.37	48.431	51.569	Low	57.4896	45.5891	51.6282	0.757	56.7			LOC_Os02g16940	2.92	47.1467	52.8533	Low	55.9783	45.788	56.7935	0.779	57.8
	LOC_Os04g14260	-2.31	47.6119	52.3881	Low	58.6567	42.2388	56.2687	0.776	58.7			LOC_Os02g36020	2.33	50.9731	49.0269	Low	54.0373	37.0186	56.0248	0.766	59
	LOC_Os04g34490	-2	45.4222	54.5778	Low	52	45.3333	66.4	0.809	51.9			LOC_Os03g17790	2.35	40.6061	59.3939	Low	58.1818	34.5455	85.4545	0.869	36.2
	LOC_Os04g43290	-2.43	46.5221	53.4779	Low	46.0705	42.0054	72.3577	0.841	46.7			LOC_Os03g50490	2.43	40.8805	59.1195	Low	56.8733	45.5526	74.9326	0.856	45.8
	LOC_Os09g13650	-2.8	51.9862	48.0138	Low	44.5596	45.5959	53.886	0.784	51.4			LOC_Os04g27810	2.12	40.4762	59.5238	Low	63.6364	51.9481	62.987	0.76	43.3
	LOC_Os09g19380	-2.66	49.9376	50.0624	Low	59.176	47.191	43.8202	0.734	55.5			LOC_Os05g10620	2.2	41.2477	58.7523	Low	60.3352	45.2514	70.6704	0.845	47.1
	LOC_Os09g19400	-2.91	45.2316	54.7684	Low	53.406	43.3243	67.5749	0.83	54.4			LOC_Os09g17152	2.23	41.7379	58.2621	Low	56.8376	46.1538	71.7949	0.837	48.7
	LOC_Os11g02540	-2.75	42.8283	57.1717	Low	51.5152	53.0303	66.9697	0.83	52.1			LOC_Os09g25430	2.5	42.9585	57.0415	Low	54.1033	46.8085	70.2128	0.843	53.2
													LOC_Os12g30180	2.16	50.4523	49.5477	Low	51.1482	42.1712	55.3236	0.765	57.6
High	LOC_Os01g62490	-3.64	35.1211	64.8789	High	56.4014	45.3287	92.9066	0.907	33.7
	LOC_Os05g28830	-3.67	29.1575	70.8425	High	63.956	51.4286	97.1429	0.92	29.5		High	LOC_Os01g52730	3.56	27.2265	72.7735	High	67.1756	59.542	91.6031	0.879	31.6
	LOC_Os09g19390	-3.96	55.5879	44.4121	Low	47.8134	38.484	46.9388	0.749	61			LOC_Os01g56570	3.36	30.6349	69.3651	High	66.9048	49.2857	91.9048	0.898	33.8
	LOC_Os11g36000	-3.14	55.8373	44.1627	Low	45.1664	41.3629	45.9588	0.736	57.1			LOC_Os01g57230	3.14	31.8687	68.1313	High	62.4242	48.1818	93.7879	0.907	33.9
													LOC_Os01g71830	3.52	34.9007	65.0993	High	58.6207	42.9467	93.7304	0.917	33.2
													LOC_Os02g12680	5.29	29.2748	70.7252	High	70.0599	45.9082	96.2076	0.933	30
													LOC_Os02g42640	3.71	30.622	69.378	High	70.0957	51.9139	86.1244	0.882	37.9
													LOC_Os03g15340	3.97	31.9559	68.0441	High	57.0248	54.5455	92.562	0.927	30.7
													LOC_Os03g32230	3.46	29.4118	70.5882	High	62.4434	57.4661	91.8552	0.905	34.9
													LOC_Os03g48770	3.61	35.0877	64.9123	High	62.2807	42.1053	90.3509	0.903	32.9
													LOC_Os03g57640	3.68	27.7932	72.2068	High	72.0222	49.5845	95.0139	0.923	32.2
													LOC_Os03g61500	3.29	29.5775	70.4225	High	59.1549	56.338	95.7746	0.926	35.7
													LOC_Os04g45590	3.14	39.2045	60.7955	High	62.5	40.3409	79.5455	0.847	47.4
													LOC_Os04g50940	4.4	34.7801	65.2199	High	57.4653	43.5764	94.6181	0.916	32.1
													LOC_Os04g52110	3.11	27.8788	72.1212	High	67.6364	54.5455	94.1818	0.921	38.1
													LOC_Os04g55980	3.69	31.1966	68.8034	High	70.5128	70.5128	65.3846	0.769	39.3
													LOC_Os05g05930	3.11	21.4777	78.5223	High	74.7423	67.0103	93.8144	0.881	31.8
													LOC_Os05g33410	3.63	32.4201	67.5799	High	59.8174	53.4247	89.4977	0.889	34.7
													LOC_Os05g46480	3.76	30.6799	69.3201	High	61.194	52.2388	94.5274	0.931	31.1
													LOC_Os07g01340	3.17	34.5029	65.4971	High	60.2339	42.6901	93.5673	0.919	32.1
													LOC_Os08g02030	3.59	32.054	67.946	High	64.3923	50.9595	88.4861	0.888	35.4
													LOC_Os08g40270	3.03	28.8739	71.1261	High	66.3514	50.6757	96.3514	0.925	30.7
													LOC_Os08g40680	3.01	38.9262	61.0738	High	60.7383	46.3087	76.1745	0.857	42.6
													LOC_Os08g41750	3.16	33.5125	66.4875	High	64.5161	49.1935	85.7527	0.882	36.3
													LOC_Os11g26780	4.09	31.1111	68.8889	High	64.8485	49.697	92.1212	0.919	33.4
													LOC_Os01g28970	3.28	43.8923	56.1077	Low	53.4161	54.6584	60.2484	0.803	54
													LOC_Os01g42860	3.84	43.8356	56.1644	Low	63.0137	39.726	65.7534	0.805	44.7
													LOC_Os01g54030	3.38	50.5688	49.4312	Low	59.0444	39.9317	49.3174	0.755	56.6
													LOC_Os02g02210	3.87	55.9229	44.0771	Low	53.3058	41.1157	37.8099	0.731	52.6
													LOC_Os02g17000	3.8	43.8632	56.1368	Low	57.1429	45.674	65.5936	0.804	55.7
													LOC_Os08g24630	3.15	56.0307	43.9693	Low	48.3553	39.4737	44.0789	0.74	52.1
