# Supplementary material for: Codon Usage Provide Insights into the Adaptation of Rice Genes under Stress Condition
Source: Int J Mol Sci. 2023 Jan 6;24(2):1098. doi: 10.3390/ijms24021098 (PMC9861248; doi:10.3390/ijms24021098)
Supplement: Supplementary file 1 [file ijms-24-01098-s001.zip › Supplementary Table S7.xlsx]

## Sheet: Sheet1
Supplementary Table S7: Ggene ontology (GO) analysis of the genes showing maximum codon bias
Locus_ID	Fold change	Gene symbol	Gene Ontology	Functional domain_InterPro	Protein
LOC_Os10g40520	-4.4354		Biological Process: lipid transport (GO:0006869)	Bifunctional inhibitor/plant lipid transfer protein/seed storage (IPR016140), Plant lipid transfer protein/hydrophobic protein, helical domain (IPR013770), Plant lipid transfer protein/seed storage/trypsin-alpha amylase inhibitor (IPR003612)	B6U436
LOC_Os10g40810	-3.61697	OsGATA7	Biological Process: positive regulation of transcription, DNA-templated (GO:0045893), Biological Process: regulation of transcription, DNA-templated (GO:0006355), Cellular Component: nucleus (GO:0005634), Molecular Function: DNA binding (GO:0003677), Molecular Function: sequence-specific DNA binding (GO:0043565), Molecular Function: zinc ion binding (GO:0008270)	Transcription factor, GATA, plant (IPR016679), Zinc finger, GATA-type (IPR000679), Zinc finger, NHR/GATA-type (IPR013088)	Q94LQ6
LOC_Os02g53130	-3.49434	OsNR2	Biological Process: nitrate assimilation (GO:0042128), Biological Process: nitric oxide biosynthetic process (GO:0006809), Biological Process: oxidation-reduction process (GO:0055114), Molecular Function: heme binding (GO:0020037), Molecular Function: molybdenum ion binding (GO:0030151), Molecular Function: molybdopterin cofactor binding (GO:0043546), Molecular Function: nitrate reductase (NADPH)…	Cytochrome b5, heme-binding site (IPR018506), Cytochrome b5-like heme/steroid binding domain (IPR001199), Cytochrome b5-like heme/steroid binding domain superfamily (IPR036400), Eukaryotic molybdopterin oxidoreductase (IPR008335), FAD-binding domain, ferredoxin reductase-type (IPR017927), Ferredoxin-NADP reductase (FNR), nucleotide-binding domain (IPR039261), Flavoprotein pyridine nucleotide cyto…	Q6ZHH7
LOC_Os09g35020	-3.1633		Biological Process: regulation of transcription, DNA-dependent (GO:0006355), Molecular Function: DNA binding (GO:0003677), Molecular Function: sequence-specific DNA binding transcription factor activity (GO:0003700)	Pathogenesis-related transcriptional factor/ERF, DNA-binding (IPR001471), DNA-binding, integrase-type (IPR016177)	A2Z388
LOC_Os03g11160	-2.98268				Q10Q48
LOC_Os03g45450	-2.97517		Biological Process: regulation of transcription, DNA-dependent (GO:0006355), Molecular Function: sequence-specific DNA binding (GO:0043565), Molecular Function: sequence-specific DNA binding transcription factor activity (GO:0003700)	DNA-binding WRKY (IPR003657)	NP_001050814.2
LOC_Os02g53850	-2.77455		Biological Process: negative regulation of catalytic activity (GO:0043086), Biological Process: proteolysis (GO:0006508), Molecular Function: identical protein binding (GO:0042802), Molecular Function: serine-type endopeptidase activity (GO:0004252)	Peptidase S8, subtilisin, Ser-active site (IPR023828), Peptidase S8, subtilisin-related (IPR015500), Peptidase S8/S53, subtilisin/kexin/sedolisin (IPR000209), Protease-associated domain, PA (IPR003137), Proteinase inhibitor I9, subtilisin propeptide (IPR010259)	NP_001048300.2
LOC_Os02g37760	-2.51102		Biological Process: lipid metabolic process (GO:0006629), Molecular Function: O-acyltransferase activity (GO:0008374)	Lecithin:cholesterol/phospholipid:diacylglycerol acyltransferase (IPR003386)	NP_001047282.2
LOC_Os02g46100	-2.28167	OsATL32		Zinc finger, RING-type (IPR001841), Zinc finger, RING/FYVE/PHD-type (IPR013083)	Q6ZHC6
LOC_Os10g36500	-2.14826		Molecular Function: enzyme inhibitor activity (GO:0004857), Molecular Function: pectinesterase activity (GO:0030599)	Pectinesterase inhibitor (IPR006501)	NP_001152421.1
LOC_Os12g24320	-2.07776		Molecular Function: ATP binding (GO:0005524), Molecular Function: nucleoside-triphosphatase activity (GO:0017111), Molecular Function: nucleotide binding (GO:0000166)	ATPase, AAA+ type, core (IPR003593), ATPase, AAA-type, conserved site (IPR003960), ATPase, AAA-type, core (IPR003959)	Q5BHT3
LOC_Os08g01160	-2.02323			Uncharacterised protein family UPF0497, trans-membrane plant (IPR006702), Uncharacterised protein family UPF0497, trans-membrane plant subgroup (IPR006459)	A2YQB8
LOC_Os03g15340	-1.21789		Molecular Function: copper ion binding (GO:0005507), Molecular Function: electron carrier activity (GO:0009055)	Cupredoxin (IPR008972), Plastocyanin-like (IPR003245)	NP_001149612.1
LOC_Os01g55940	1.10967	GH3-2, OsGH3-2	GRETCHEN HAGEN3-2		GH3 family (IPR004993)
LOC_Os03g41390	1.17063		Cellular Component: intracellular (GO:0005622), Molecular Function: zinc ion binding (GO:0008270)	Zinc finger, C2H2 (IPR007087), Zinc finger, C2H2-like (IPR015880)	A2XJH1
LOC_Os02g52210	1.19872	OsATL38		Zinc finger, RING/FYVE/PHD-type (IPR013083), Zinc finger, RING-type (IPR001841)	Q6PU50
LOC_Os01g04330	1.30181	OsCML16	CALMODULIN-LIKE PROTEIN 16, calmodulin-like protein 16		EF-Hand 1, calcium-binding site (IPR018247), EF-hand domain (IPR002048), EF-hand domain pair (IPR011992)
LOC_Os07g40290	1.44012	GH3-8, OsGH3-8, OsMGH3, OsGH3.8	GH3-8, IAA-amino synthetase, OsMADS1 regulated GH3 domain-encoding gene		GH3 auxin-responsive promoter (IPR004993)
LOC_Os01g51690	1.57713		Biological Process: regulation of transcription, DNA-dependent (GO:0006355), Molecular Function: sequence-specific DNA binding transcription factor activity (GO:0003700), Molecular Function: sequence-specific DNA binding (GO:0043565)	DNA-binding WRKY (IPR003657)	Q6IEM2
LOC_Os05g28830	1.74013			Domain of unknown function DUF231, plant (IPR004253)	XP_002884829.1
LOC_Os04g27810	1.78347
LOC_Os07g22730	1.79886				Q7EYP8
LOC_Os07g01340	1.9374		Biological Process: oxidation-reduction process (GO:0055114), Molecular Function: oxidoreductase activity (GO:0016491), Molecular Function: oxidoreductase activity, acting on paired donors, with incorporation or reduction of molecular oxygen, 2-oxoglutarate as one donor, and incorporation of one atom each of oxygen into both donors (GO:0016706)	Oxoglutarate/iron-dependent oxygenase (IPR005123)	A2YHB5
LOC_Os01g03330	1.94378		Cellular Component: extracellular region (GO:0005576), Molecular Function: serine-type endopeptidase inhibitor activity (GO:0004867)	Proteinase inhibitor I12, Bowman-Birk (IPR000877)	A5HEI2
LOC_Os02g26430	1.95262	WRKY42, OsWRKY42	Biological Process: regulation of transcription, DNA-templated (GO:0006355), Molecular Function: sequence-specific DNA binding (GO:0043565), Molecular Function: sequence-specific DNA binding transcription factor activity (GO:0003700)	DNA-binding WRKY (IPR003657), Zn-cluster domain (IPR018872)	Q6IEN9, Q6K4Y7
LOC_Os01g71830	2.06245		Biological Process: carbohydrate metabolic process (GO:0005975), Molecular Function: catalytic activity (GO:0003824), Molecular Function: cation binding (GO:0043169), Molecular Function: hydrolase activity, hydrolyzing O-glycosyl compounds (GO:0004553)	Glycoside hydrolase, family 17 (IPR000490), Glycoside hydrolase, subgroup, catalytic domain (IPR013781), Glycoside hydrolase, superfamily (IPR017853)	Q8W264
LOC_Os02g45780	2.15456	DHS		Zinc finger, RING/FYVE/PHD-type (IPR013083), Zinc finger, RING-type (IPR001841)	Q6EU38
LOC_Os02g46180	2.21771	OsFLZ6		Zf-FLZ domain (IPR007650)	Q6ZHB7
LOC_Os03g56010	2.31902		Biological Process: regulation of transcription, DNA-dependent (GO:0006355), Molecular Function: protein dimerization activity (GO:0046983), Molecular Function: sequence-specific DNA binding (GO:0043565), Molecular Function: sequence-specific DNA binding transcription factor activity (GO:0003700)	Basic-leucine zipper (bZIP) transcription factor (IPR004827), bZIP transcription factor, bZIP-1 (IPR011616)	NP_001051401.1
LOC_Os01g03720	3.06723		Biological Process: regulation of transcription, DNA-dependent (GO:0006355), Molecular Function: DNA binding (GO:0003677), Molecular Function: protein binding (GO:0005515)	Homeodomain-like (IPR009057), Homeodomain-related (IPR012287), Myb transcription factor (IPR015495), Myb, DNA-binding (IPR014778), SANT domain, DNA binding (IPR001005), Transcription regulator HTH, Myb-type, DNA-binding (IPR017930)	B4FU27
LOC_Os05g50570	3.11318		Biological Process: proteolysis (GO:0006508), Molecular Function: serine-type carboxypeptidase activity (GO:0004185)	Peptidase S10, serine carboxypeptidase (IPR001563), Peptidase S10, serine carboxypeptidase, active site (IPR018202)	A2Y7Y2
LOC_Os03g48770	3.59279	OsOXO3	Molecular Function: manganese ion binding (GO:0030145), Molecular Function: nutrient reservoir activity (GO:0045735)	Cupin 1 (IPR006045), Germin (IPR001929), Germin, manganese binding site (IPR019780), RmlC-like cupin domain superfamily (IPR011051), RmlC-like jelly roll fold (IPR014710)	Q851K0
LOC_Os01g06740	3.98269	OsRIP1	Biological Process: negative regulation of translation (GO:0017148), Molecular Function: rRNA N-glycosylase activity (GO:0030598)	Ribosome-inactivating protein, subdomain 1 (IPR016138), Ribosome-inactivating protein superfamily (IPR036041), Ribosome-inactivating protein, subdomain 2 (IPR016139), Ribosome-inactivating protein (IPR001574), Ribosome-inactivating protein type 1/2 (IPR017989)	Q9LGK6
LOC_Os01g12580	4.22749	OsLea14-A	Biological Process: response to desiccation (GO:0009269)	Late embryogenesis abundant protein, LEA_2 subgroup (IPR004864), Water stress and hypersensitive response domain (IPR013990)	Q9AWZ5
LOC_Os03g17790	4.65901	OsRCI2-5	Cellular Component: integral component of membrane (GO:0016021)	Proteolipid membrane potential modulator (IPR000612)	Q8H001
LOC_Os02g12680	5.30299	HPL2, AOS3, OsHPL2, OsAOS3	Biological Process: oxidation-reduction process (GO:0055114), Molecular Function: heme binding (GO:0020037), Molecular Function: iron ion binding (GO:0005506), Molecular Function: monooxygenase activity (GO:0004497), Molecular Function: oxidoreductase activity, acting on paired donors, with incorporation or reduction of molecular oxygen (GO:0016705)	Cytochrome P450 (IPR001128), Cytochrome P450, E-class, group IV (IPR002403)	Q0E2R7, Q6Z6L1
LOC_Os01g06560	5.60698	OsDOG1L-1			A2WKY1
