# Supplementary material for: Codon Usage Provide Insights into the Adaptation of Rice Genes under Stress Condition
Source: Int J Mol Sci. 2023 Jan 6;24(2):1098. doi: 10.3390/ijms24021098 (PMC9861248; doi:10.3390/ijms24021098)
Supplement: Supplementary file 1 [file ijms-24-01098-s001.zip › Supplemnetary Table S1.xlsx]

## Sheet: Sheet1
Supplementary Table S1: List of SRA libraries, their accession and cultivars used in current study.
Accession	Stress	Cultivar
SRP071248	Drought long day Drought short day	Nipponbare
SRP052306	Drought	Nipponbare
SRP113286	Salt	9311
SRP101342	High Temperature	IRBB61
SRP004651	Cold	Nipponbare
SRP056884	Xoc BLS256 Xoc RS105 Xoc CFBP7331	Nipponbare
SRP049040	Xoo PXO349 1 dpi Xoo PXO349 2 dpi	Huanghuazhan
SRP076382	M. oryzae Guy11	Kasalath
SRP049444	M. oryzae ZB13	Pid3
SRP065503	Rice Stripe Virus	Wuyujing 3
SRP115030	Rice Dwarf Virus	Zhonghua 11
