# Supplementary material for: Codon Usage Provide Insights into the Adaptation of Rice Genes under Stress Condition
Source: Int J Mol Sci. 2023 Jan 6;24(2):1098. doi: 10.3390/ijms24021098 (PMC9861248; doi:10.3390/ijms24021098)
Supplement: Supplementary file 1 [file ijms-24-01098-s001.zip › Supplemnetary Table S2.xlsx]

## Sheet: Sheet1
Supplementary Table S2. Differentially expressed genes in rice under abiotic and biotic stress conditions
Abiotic stress condition		Biotic stress condition
Locus	log2fold change	Locus	log2fold change
LOC_Os01g01120	-2.45996	LOC_Os01g01120	-1.19297
LOC_Os01g02000	-1.63754	LOC_Os01g02000	-1.37225
LOC_Os01g02020	1.73038	LOC_Os01g02020	1.14316
LOC_Os01g02080	-2.42862	LOC_Os01g02080	-1.20752
LOC_Os01g02780	-2.46765	LOC_Os01g02780	-2.06172
LOC_Os01g02930	1.43045	LOC_Os01g02930	1.00044
LOC_Os01g03330	1.94378	LOC_Os01g03330	1.08136
LOC_Os01g03360	3.16711	LOC_Os01g03360	1.85864
LOC_Os01g03720	3.06723	LOC_Os01g03720	2.13695
LOC_Os01g03730	2.70554	LOC_Os01g03730	1.17512
LOC_Os01g04050	1.20712	LOC_Os01g04050	1.03665
LOC_Os01g04330	1.30181	LOC_Os01g04330	1.23509
LOC_Os01g04360	1.19741	LOC_Os01g04360	1.88482
LOC_Os01g04370	2.36943	LOC_Os01g04370	1.05904
LOC_Os01g06220	-1.32782	LOC_Os01g06220	1.10767
LOC_Os01g06310	NA	LOC_Os01g06310	-1.38151
LOC_Os01g06310	2.28828	LOC_Os01g06560	1.56825
LOC_Os01g06560	5.60698	LOC_Os01g06740	3.09559
LOC_Os01g06740	3.98269	LOC_Os01g08110	1.18956
LOC_Os01g08110	1.32045	LOC_Os01g08840	-2.28159
LOC_Os01g08840	-1.61026	LOC_Os01g08860	1.41335
LOC_Os01g08860	1.28747	LOC_Os01g08860	1.41335
LOC_Os01g08860	1.28747	LOC_Os01g09100	1.10166
LOC_Os01g09100	2.07985	LOC_Os01g09700	2.27212
LOC_Os01g09700	2.87088	LOC_Os01g11150	1.42144
LOC_Os01g11150	1.80734	LOC_Os01g12130	-1.26522
LOC_Os01g12130	-1.64964	LOC_Os01g12430	2.1522
LOC_Os01g12430	4.94042	LOC_Os01g12520	1.27477
LOC_Os01g12520	2.54586	LOC_Os01g12580	1.62661
LOC_Os01g12580	4.22749	LOC_Os01g12660	1.03901
LOC_Os01g12660	4.22129	LOC_Os01g12820	3.14729
LOC_Os01g12820	3.78269	LOC_Os01g13120	-1.14588
LOC_Os01g13120	-2.9602	LOC_Os01g15340	1.68921
LOC_Os01g15340	1.219	LOC_Os01g16450	1.19691
LOC_Os01g16450	-1.28864	LOC_Os01g16920	1.90624
LOC_Os01g16920	3.76076	LOC_Os01g17170	-1.01286
LOC_Os01g17170	-1.1409	LOC_Os01g19480	-2.15806
LOC_Os01g19480	-2.07092	LOC_Os01g20206	1.98854
LOC_Os01g20206	2.64358	LOC_Os01g20720	-1.56057
LOC_Os01g20720	-1.04662	LOC_Os01g22570	2.03405
LOC_Os01g22570	-1.64503	LOC_Os01g22640	-1.21741
LOC_Os01g22640	-1.37749	LOC_Os01g24090	-1.21216
LOC_Os01g24090	-1.81013	LOC_Os01g24710	1.34095
LOC_Os01g24710	2.38196	LOC_Os01g24820	1.77636
LOC_Os01g24820	4.56243	LOC_Os01g26210	-1.09066
LOC_Os01g26210	-1.14517	LOC_Os01g26240	-1.30288
LOC_Os01g26240	-1.30513	LOC_Os01g26300	-1.65702
LOC_Os01g26300	-1.40325	LOC_Os01g27340	1.62127
LOC_Os01g27340	1.62919	LOC_Os01g28840	1.48299
LOC_Os01g28840	6.03151	LOC_Os01g28970	3.2768
LOC_Os01g28970	2.61985	LOC_Os01g31370	2.24617
LOC_Os01g31370	2.38338	LOC_Os01g31690	-1.05831
LOC_Os01g31690	-2.10046	LOC_Os01g32780	1.58532
LOC_Os01g32780	5.23566	LOC_Os01g36790	2.39981
LOC_Os01g36790	1.95353	LOC_Os01g37200	1.82073
LOC_Os01g37200	2.62046	LOC_Os01g37750	1.57836
LOC_Os01g37750	1.4756	LOC_Os01g37810	1.7219
LOC_Os01g37810	1.74416	LOC_Os01g38580	1.23595
LOC_Os01g38580	1.34841	LOC_Os01g39136	2.19104
LOC_Os01g39136	1.74691	LOC_Os01g40190	1.15448
LOC_Os01g40190	1.83991	LOC_Os01g40280	1.5217
LOC_Os01g40280	2.59492	LOC_Os01g41430	2.12362
LOC_Os01g41430	-1.21802	LOC_Os01g41710	-1.35788
LOC_Os01g41710	-2.36913	LOC_Os01g42380	1.06683
LOC_Os01g42380	1.39839	LOC_Os01g42410	1.43817
LOC_Os01g42410	2.02745	LOC_Os01g42790	1.45322
LOC_Os01g42790	-3.0274	LOC_Os01g42860	3.84486
LOC_Os01g42860	4.72981	LOC_Os01g44970	-1.31703
LOC_Os01g44970	-1.38778	LOC_Os01g45274	-1.2581
LOC_Os01g45274	-2.32934	LOC_Os01g45640	1.98314
LOC_Os01g45640	2.8397	LOC_Os01g46570	1.59562
LOC_Os01g46570	1.35331	LOC_Os01g47290	2.14449
LOC_Os01g47290	2.40823	LOC_Os01g47300	1.48796
LOC_Os01g47300	2.98322	LOC_Os01g47370	-1.52409
LOC_Os01g47370	-3.65475	LOC_Os01g47780	-2.65665
LOC_Os01g47780	-1.45475	LOC_Os01g47820	-1.42978
LOC_Os01g47820	-1.13146	LOC_Os01g48000	2.00083
LOC_Os01g48000	1.85204	LOC_Os01g48446	1.22021
LOC_Os01g48446	1.18429	LOC_Os01g49430	2.49197
LOC_Os01g49430	-2.69728	LOC_Os01g50080	-1.03488
LOC_Os01g50080	-1.61585	LOC_Os01g50400	2.38455
LOC_Os01g50400	2.40986	LOC_Os01g50410	2.78423
LOC_Os01g50410	1.32673	LOC_Os01g50910	1.57161
LOC_Os01g50910	5.18375	LOC_Os01g51690	2.96533
LOC_Os01g51690	1.57713	LOC_Os01g52070	2.04799
LOC_Os01g52070	-1.79515	LOC_Os01g52160	-1.10668
LOC_Os01g52160	-5.61621	LOC_Os01g52610	1.63098
LOC_Os01g52610	1.3844	LOC_Os01g52730	3.55925
LOC_Os01g52730	2.7632	LOC_Os01g53260	1.39589
LOC_Os01g53260	2.00828	LOC_Os01g53900	-1.0337
LOC_Os01g53900	1.02204	LOC_Os01g54030	3.38342
LOC_Os01g54030	4.88017	LOC_Os01g54270	-1.24343
LOC_Os01g54270	-2.33006	LOC_Os01g55340	2.89383
LOC_Os01g55340	2.36859	LOC_Os01g55940	1.61037
LOC_Os01g55940	1.10967	LOC_Os01g56570	3.36009
LOC_Os01g56570	1.64286	LOC_Os01g57230	3.14191
LOC_Os01g57230	1.42923	LOC_Os01g57410	-1.04115
LOC_Os01g57410	-1.46331	LOC_Os01g58960	1.66229
LOC_Os01g58960	-1.24477	LOC_Os01g59100	1.15794
LOC_Os01g59100	2.26434	LOC_Os01g59750	-1.01679
LOC_Os01g59750	-1.15281	LOC_Os01g60020	2.01141
LOC_Os01g60020	1.43823	LOC_Os01g61880	-1.36724
LOC_Os01g61880	-1.28853	LOC_Os01g62190	1.72247
LOC_Os01g62190	3.95789	LOC_Os01g62200	-2.32606
LOC_Os01g62200	-1.45042	LOC_Os01g62490	-3.63846
LOC_Os01g62490	2.23184	LOC_Os01g62610	1.09821
LOC_Os01g62610	3.20209	LOC_Os01g62980	-1.2506
LOC_Os01g62980	2.47294	LOC_Os01g63870	-1.24421
LOC_Os01g63870	-3.14503	LOC_Os01g63980	1.23345
LOC_Os01g63980	3.02715	LOC_Os01g64000	2.79457
LOC_Os01g64000	4.21417	LOC_Os01g64310	1.06503
LOC_Os01g64310	-1.31379	LOC_Os01g64360	1.65179
LOC_Os01g64360	1.48152	LOC_Os01g64790	1.40733
LOC_Os01g64790	1.17707	LOC_Os01g65260	-1.04503
LOC_Os01g65260	-2.07546	LOC_Os01g65260	-1.04503
LOC_Os01g65880	-1.73443	LOC_Os01g65260	-1.04503
LOC_Os01g66250	-1.15997	LOC_Os01g65260	-1.04503
LOC_Os01g67120	-1.44307	LOC_Os01g65260	-1.04503
LOC_Os01g67360	-2.00622	LOC_Os01g65260	-1.04503
LOC_Os01g69070	-2.33411	LOC_Os01g65880	-1.1495
LOC_Os01g70730	-2.83824	LOC_Os01g65880	-1.1495
LOC_Os01g71820	1.16397	LOC_Os01g65880	-1.1495
LOC_Os01g71830	2.06245	LOC_Os01g65880	-1.1495
LOC_Os01g71860	5.82367	LOC_Os01g65880	-1.1495
LOC_Os01g72270	6.19299	LOC_Os01g65880	-1.1495
LOC_Os01g72460	1.3641	LOC_Os01g66250	2.20527
LOC_Os01g72530	2.70845	LOC_Os01g71820	1.28382
LOC_Os01g74160	-2.96329	LOC_Os01g71830	3.51891
LOC_Os01g74300	-4.54675	LOC_Os01g71860	1.98189
LOC_Os01g74370	1.82111	LOC_Os01g72270	2.5225
LOC_Os02g01100	1.23752	LOC_Os01g72460	1.01701
LOC_Os02g01326	1.68082	LOC_Os01g72530	1.80276
LOC_Os02g02000	-2.3729	LOC_Os01g74370	1.49433
LOC_Os02g02210	2.41086	LOC_Os02g01100	1.46736
LOC_Os02g02930	-1.47205	LOC_Os02g01326	1.37485
LOC_Os02g04340	3.30675	LOC_Os02g02210	3.87442
LOC_Os02g05550	1.60785	LOC_Os02g04340	1.549
LOC_Os02g06360	-1.10803	LOC_Os02g05550	1.47185
LOC_Os02g07170	5.41459	LOC_Os02g07170	2.537
LOC_Os02g09810	2.59635	LOC_Os02g09810	1.89253
LOC_Os02g09830	2.53022	LOC_Os02g09830	1.07246
LOC_Os02g12350	2.08311	LOC_Os02g12350	2.54605
LOC_Os02g12380	2.36704	LOC_Os02g12380	2.17609
LOC_Os02g12680	5.30299	LOC_Os02g12680	5.2943
LOC_Os02g14480	1.96702	LOC_Os02g14480	1.01628
LOC_Os02g15560	1.23453	LOC_Os02g15560	1.9332
LOC_Os02g15660	-1.38185	LOC_Os02g16940	2.91762
LOC_Os02g16940	3.16721	LOC_Os02g17000	3.80367
LOC_Os02g17000	-1.58926	LOC_Os02g17710	-1.31076
LOC_Os02g17710	-2.13948	LOC_Os02g20960	1.0078
LOC_Os02g20960	1.51755	LOC_Os02g21810	-1.35098
LOC_Os02g21810	-2.35694	LOC_Os02g21920	1.02805
LOC_Os02g21920	1.62022	LOC_Os02g22160	1.95416
LOC_Os02g22160	2.05136	LOC_Os02g26280	3.02856
LOC_Os02g26280	3.88189	LOC_Os02g26430	1.78291
LOC_Os02g26430	1.95262	LOC_Os02g26720	2.7325
LOC_Os02g26720	5.96229	LOC_Os02g30100	1.24381
LOC_Os02g30100	2.80644	LOC_Os02g32140	1.46958
LOC_Os02g32140	2.40033	LOC_Os02g32520	2.40997
LOC_Os02g32520	3.29839	LOC_Os02g32610	1.18387
LOC_Os02g32610	-1.14918	LOC_Os02g32660	1.26001
LOC_Os02g32660	1.26176	LOC_Os02g32780	-1.18301
LOC_Os02g32780	-2.4179	LOC_Os02g32970	1.02189
LOC_Os02g32970	1.56172	LOC_Os02g33550	-2.04831
LOC_Os02g33550	-1.19416	LOC_Os02g36020	2.32933
LOC_Os02g36020	2.79894	LOC_Os02g36030	1.82982
LOC_Os02g36030	-1.63495	LOC_Os02g36210	1.31222
LOC_Os02g36210	-1.4315	LOC_Os02g37760	-1.24451
LOC_Os02g37760	-2.51102	LOC_Os02g37770	-1.37229
LOC_Os02g37770	-2.01954	LOC_Os02g40240	-1.12794
LOC_Os02g40240	-2.06943	LOC_Os02g40330	1.61689
LOC_Os02g40330	2.50077	LOC_Os02g41510	1.44013
LOC_Os02g41510	2.04006	LOC_Os02g41840	2.10992
LOC_Os02g41840	3.91258	LOC_Os02g42430	1.1018
LOC_Os02g42430	-1.12747	LOC_Os02g42640	3.7132
LOC_Os02g42430	-1.12747	LOC_Os02g43330	1.84668
LOC_Os02g42640	2.82956	LOC_Os02g43560	-1.03049
LOC_Os02g43330	5.65222	LOC_Os02g43970	-1.11031
LOC_Os02g43560	2.09724	LOC_Os02g44870	1.09614
LOC_Os02g43970	-1.64609	LOC_Os02g45390	1.00014
LOC_Os02g44870	2.94053	LOC_Os02g45420	2.40635
LOC_Os02g45390	1.53444	LOC_Os02g45450	1.28141
LOC_Os02g45420	1.32517	LOC_Os02g45780	2.94566
LOC_Os02g45450	-1.08939	LOC_Os02g46100	1.44789
LOC_Os02g45780	2.15456	LOC_Os02g46180	2.98878
LOC_Os02g46100	-2.28167	LOC_Os02g46910	1.18387
LOC_Os02g46180	2.21771	LOC_Os02g47020	-1.09693
LOC_Os02g46910	1.36972	LOC_Os02g47420	-1.04842
LOC_Os02g47020	-1.73681	LOC_Os02g48200	1.61502
LOC_Os02g47420	-1.20714	LOC_Os02g48850	2.46787
LOC_Os02g48200	-1.77731	LOC_Os02g48860	1.10866
LOC_Os02g48850	1.7357	LOC_Os02g49340	1.32454
LOC_Os02g48860	1.36775	LOC_Os02g50600	1.01602
LOC_Os02g49340	-4.09497	LOC_Os02g50690	1.1776
LOC_Os02g49340	NA	LOC_Os02g51290	1.39117
LOC_Os02g50600	1.10738	LOC_Os02g51350	1.27024
LOC_Os02g50690	3.28626	LOC_Os02g51890	1.62331
LOC_Os02g51290	1.62046	LOC_Os02g51930	2.04813
LOC_Os02g51350	1.52093	LOC_Os02g52210	1.64949
LOC_Os02g51890	3.47184	LOC_Os02g52540	1.94225
LOC_Os02g51930	3.79538	LOC_Os02g52580	2.808
LOC_Os02g52210	1.19872	LOC_Os02g52590	1.92286
LOC_Os02g52540	1.29065	LOC_Os02g52670	1.93104
LOC_Os02g52580	2.02564	LOC_Os02g52930	-1.5839
LOC_Os02g52590	4.17942	LOC_Os02g53130	2.71716
LOC_Os02g52670	2.8588	LOC_Os02g53850	-2.18207
LOC_Os02g52930	-1.19035	LOC_Os02g54254	1.0353
LOC_Os02g53130	-3.49434	LOC_Os02g55870	-1.01054
LOC_Os02g53850	-2.77455	LOC_Os02g55890	1.32369
LOC_Os02g54254	4.04019	LOC_Os03g02190	-1.04768
LOC_Os02g55870	-1.65779	LOC_Os03g02690	-1.05364
LOC_Os02g55890	1.57638	LOC_Os03g02874	1.98169
LOC_Os03g02190	-2.78607	LOC_Os03g03034	1.14546
LOC_Os03g02690	-1.23965	LOC_Os03g03600	-1.89365
LOC_Os03g02874	2.20894	LOC_Os03g03790	-1.65015
LOC_Os03g03034	1.04704	LOC_Os03g06250	1.02384
LOC_Os03g03600	-2.73832	LOC_Os03g07170	1.2477
LOC_Os03g03790	-1.31279	LOC_Os03g07180	2.27183
LOC_Os03g06250	1.47172	LOC_Os03g07930	1.58728
LOC_Os03g07170	2.10351	LOC_Os03g09170	1.04867
LOC_Os03g07180	6.28257	LOC_Os03g09910	1.73349
LOC_Os03g07930	2.31747	LOC_Os03g10800	1.05988
LOC_Os03g09170	2.11296	LOC_Os03g11110	-1.06994
LOC_Os03g09910	1.28949	LOC_Os03g11160	-1.24322
LOC_Os03g10800	1.08285	LOC_Os03g12660	-1.4079
LOC_Os03g11110	-1.53523	LOC_Os03g12820	1.73276
LOC_Os03g11160	-2.98268	LOC_Os03g13140	2.27565
LOC_Os03g12660	-1.36837	LOC_Os03g14370	1.19799
LOC_Os03g12820	3.20553	LOC_Os03g15270	1.60166
LOC_Os03g13140	1.7693	LOC_Os03g15340	3.96879
LOC_Os03g14370	1.04237	LOC_Os03g16030	2.39526
LOC_Os03g15270	1.5995	LOC_Os03g16670	1.03514
LOC_Os03g15340	-1.21789	LOC_Os03g16920	1.52584
LOC_Os03g16030	1.51533	LOC_Os03g17790	2.3521
LOC_Os03g16670	1.15666	LOC_Os03g17870	1.02584
LOC_Os03g16920	3.13119	LOC_Os03g18030	1.31551
LOC_Os03g17790	4.65901	LOC_Os03g18060	-2.37302
LOC_Os03g17870	3.36466	LOC_Os03g18490	3.14191
LOC_Os03g18030	1.15736	LOC_Os03g18970	1.32165
LOC_Os03g18060	-1.93575	LOC_Os03g19290	1.65312
LOC_Os03g18490	6.54421	LOC_Os03g19990	-1.91954
LOC_Os03g18970	1.92943	LOC_Os03g20550	1.48228
LOC_Os03g19290	4.42753	LOC_Os03g20700	-1.22985
LOC_Os03g19990	-2.63332	LOC_Os03g22020	2.25654
LOC_Os03g20550	3.14661	LOC_Os03g22634	-1.40693
LOC_Os03g20700	-1.79334	LOC_Os03g22680	1.143
LOC_Os03g22020	1.40176	LOC_Os03g22790	1.77374
LOC_Os03g22634	-2.33665	LOC_Os03g22820	1.16484
LOC_Os03g22680	2.32362	LOC_Os03g24160	1.22464
LOC_Os03g22790	1.17428	LOC_Os03g24590	-1.08019
LOC_Os03g22820	1.46318	LOC_Os03g25760	2.17694
LOC_Os03g24160	-1.99085	LOC_Os03g26910	1.02975
LOC_Os03g24590	-1.13155	LOC_Os03g27110	1.30398
LOC_Os03g25760	2.76784	LOC_Os03g28090	1.93313
LOC_Os03g26910	2.06469	LOC_Os03g30420	-1.45127
LOC_Os03g27110	4.67277	LOC_Os03g32230	3.45508
LOC_Os03g28090	3.336	LOC_Os03g33520	2.44923
LOC_Os03g30420	-1.78035	LOC_Os03g36279	1.7252
LOC_Os03g32230	1.50443	LOC_Os03g36530	-1.69306
LOC_Os03g33520	3.30962	LOC_Os03g39610	-1.08346
LOC_Os03g36279	3.8805	LOC_Os03g41390	2.3402
LOC_Os03g36530	-1.73543	LOC_Os03g43750	3.13682
LOC_Os03g39610	-1.29009	LOC_Os03g43880	1.1351
LOC_Os03g41390	1.17063	LOC_Os03g45450	-1.40377
LOC_Os03g43750	3.13251	LOC_Os03g45800	2.29855
LOC_Os03g43880	1.13916	LOC_Os03g47280	1.23925
LOC_Os03g45450	-2.97517	LOC_Os03g48750	3.00005
LOC_Os03g45800	-1.24784	LOC_Os03g48770	3.60979
LOC_Os03g47280	-1.43948	LOC_Os03g50490	2.42758
LOC_Os03g48750	2.25603	LOC_Os03g52370	1.36454
LOC_Os03g48770	3.59279	LOC_Os03g56010	1.3245
LOC_Os03g50490	3.28593	LOC_Os03g56060	1.10921
LOC_Os03g52370	1.40235	LOC_Os03g56930	-1.19321
LOC_Os03g56010	2.31902	LOC_Os03g56950	-1.06106
LOC_Os03g56060	2.42105	LOC_Os03g57149	-1.17166
LOC_Os03g56930	-1.93058	LOC_Os03g57640	3.6842
LOC_Os03g56950	-1.5283	LOC_Os03g57720	1.60837
LOC_Os03g57149	-1.66379	LOC_Os03g57960	1.25478
LOC_Os03g57640	2.94234	LOC_Os03g58764	1.8726
LOC_Os03g57720	3.09296	LOC_Os03g58850	1.99239
LOC_Os03g57960	2.27612	LOC_Os03g59240	-1.16413
LOC_Os03g58764	2.06042	LOC_Os03g59460	1.11865
LOC_Os03g58850	1.11461	LOC_Os03g60080	2.22759
LOC_Os03g59240	-1.5424	LOC_Os03g60370	1.10757
LOC_Os03g59460	2.9871	LOC_Os03g60560	1.75119
LOC_Os03g60080	1.20075	LOC_Os03g60570	1.80818
LOC_Os03g60370	3.34997	LOC_Os03g61040	-1.12917
LOC_Os03g60560	4.19878	LOC_Os03g61360	2.47247
LOC_Os03g60570	4.60703	LOC_Os03g61500	3.28866
LOC_Os03g61040	-1.78271	LOC_Os03g63390	1.86111
LOC_Os03g61360	3.65722	LOC_Os03g64260	1.03763
LOC_Os03g61500	1.57064	LOC_Os04g01470	1.96555
LOC_Os03g63390	2.93589	LOC_Os04g01740	1.14235
LOC_Os03g64260	1.60438	LOC_Os04g02850	-1.05238
LOC_Os04g01470	-1.41722	LOC_Os04g10569	2.55222
LOC_Os04g01740	2.26014	LOC_Os04g11195	-1.00358
LOC_Os04g02850	-1.56772	LOC_Os04g11970	-1.01596
LOC_Os04g10569	1.27201	LOC_Os04g12970	1.47168
LOC_Os04g11195	-1.96785	LOC_Os04g13210	1.40913
LOC_Os04g11970	-2.12804	LOC_Os04g14260	-2.31047
LOC_Os04g12970	2.69702	LOC_Os04g14280	-1.38211
LOC_Os04g13210	1.6192	LOC_Os04g15920	-1.50247
LOC_Os04g14260	-1.28595	LOC_Os04g19114	1.16026
LOC_Os04g14280	-1.66237	LOC_Os04g20290	2.26003
LOC_Os04g15920	-1.78022	LOC_Os04g21350	-1.09621
LOC_Os04g19114	1.17245	LOC_Os04g25650	2.41926
LOC_Os04g20290	1.7748	LOC_Os04g27810	2.12037
LOC_Os04g21350	-1.76489	LOC_Os04g28990	-1.7121
LOC_Os04g25650	1.15532	LOC_Os04g29580	-1.09669
LOC_Os04g27810	1.78347	LOC_Os04g29680	-1.9359
LOC_Os04g28990	-1.56486	LOC_Os04g29790	-1.7073
LOC_Os04g29580	-4.19043	LOC_Os04g29800	-1.797
LOC_Os04g29680	-3.77712	LOC_Os04g29960	-1.03641
LOC_Os04g29790	-2.76286	LOC_Os04g30030	-1.47715
LOC_Os04g29800	-1.76677	LOC_Os04g30250	-1.025
LOC_Os04g29960	-3.21843	LOC_Os04g30260	1.06375
LOC_Os04g30030	-1.4799	LOC_Os04g32320	1.36079
LOC_Os04g30250	-1.04938	LOC_Os04g32480	1.38272
LOC_Os04g30260	1.30872	LOC_Os04g33660	-1.30471
LOC_Os04g32320	2.65237	LOC_Os04g33820	1.38825
LOC_Os04g32480	1.1591	LOC_Os04g33830	-1.17953
LOC_Os04g33660	-2.11196	LOC_Os04g34490	-1.99573
LOC_Os04g33820	4.77298	LOC_Os04g34970	1.28279
LOC_Os04g33830	-1.86627	LOC_Os04g35250	2.13176
LOC_Os04g34490	1.19518	LOC_Os04g35270	1.58139
LOC_Os04g34970	3.99195	LOC_Os04g36720	-1.01948
LOC_Os04g35250	1.38266	LOC_Os04g37490	1.75901
LOC_Os04g35270	1.37077	LOC_Os04g37520	1.52343
LOC_Os04g36720	-1.46398	LOC_Os04g37770	2.22089
LOC_Os04g37490	1.47404	LOC_Os04g38410	-1.4171
LOC_Os04g37520	-3.49206	LOC_Os04g38600	-1.23724
LOC_Os04g37770	-1.5634	LOC_Os04g38680	1.98564
LOC_Os04g38410	-2.58749	LOC_Os04g39360	1.13532
LOC_Os04g38600	-2.1271	LOC_Os04g39370	-1.04537
LOC_Os04g38680	4.58256	LOC_Os04g39980	1.2497
LOC_Os04g39360	-1.27384	LOC_Os04g40070	1.59654
LOC_Os04g39370	-2.10827	LOC_Os04g40990	1.21188
LOC_Os04g39980	1.04145	LOC_Os04g43200	2.10065
LOC_Os04g40070	4.59569	LOC_Os04g43290	-2.43253
LOC_Os04g40990	4.20712	LOC_Os04g43400	-1.13239
LOC_Os04g43200	6.42774	LOC_Os04g43440	1.67378
LOC_Os04g43290	-1.06781	LOC_Os04g43680	2.06742
LOC_Os04g43400	-1.65401	LOC_Os04g44220	-1.16799
LOC_Os04g43440	1.07206	LOC_Os04g44330	-1.75438
LOC_Os04g43680	1.44223	LOC_Os04g44550	1.38804
LOC_Os04g44220	-1.9388	LOC_Os04g44550	1.38804
LOC_Os04g44330	-1.15737	LOC_Os04g44550	1.38804
LOC_Os04g44550	1.53423	LOC_Os04g45590	3.14287
LOC_Os04g45590	3.51718	LOC_Os04g48350	1.61741
LOC_Os04g45700	2.60266	LOC_Os04g48930	-1.38933
LOC_Os04g46970	1.90738	LOC_Os04g48930	-1.38933
LOC_Os04g48350	-1.27766	LOC_Os04g49360	1.72573
LOC_Os04g48930	-4.5037	LOC_Os04g49660	-1.05497
LOC_Os04g48930	-4.5037	LOC_Os04g49920	-1.06412
LOC_Os04g49360	1.71873	LOC_Os04g49980	2.0477
LOC_Os04g49660	-1.06851	LOC_Os04g50790	1.10989
LOC_Os04g49920	-1.73713	LOC_Os04g50940	4.40482
LOC_Os04g49980	5.3447	LOC_Os04g51150	1.34191
LOC_Os04g50790	1.27613	LOC_Os04g51160	1.45736
LOC_Os04g50940	1.65478	LOC_Os04g52110	3.11008
LOC_Os04g51150	1.82494	LOC_Os04g52810	1.06387
LOC_Os04g51160	1.56878	LOC_Os04g53994	1.48065
LOC_Os04g52110	8.55712	LOC_Os04g55720	1.1232
LOC_Os04g52810	1.32213	LOC_Os04g55980	3.685
LOC_Os04g53994	1.86634	LOC_Os04g56030	1.01222
LOC_Os04g55720	2.12417	LOC_Os04g56040	1.53453
LOC_Os04g55980	1.37138	LOC_Os04g56240	-1.07782
LOC_Os04g56030	1.02863	LOC_Os04g56430	2.76795
LOC_Os04g56040	1.65342	LOC_Os04g56470	1.01474
LOC_Os04g56240	-1.52193	LOC_Os04g57810	1.43218
LOC_Os04g56430	3.50161	LOC_Os04g58190	1.15644
LOC_Os04g56470	1.81118	LOC_Os04g58200	-1.68939
LOC_Os04g57810	1.75076	LOC_Os04g58850	1.42196
LOC_Os04g58190	1.16469	LOC_Os04g59190	1.03901
LOC_Os04g58200	-1.17601	LOC_Os05g01380	1.13393
LOC_Os04g58850	1.44444	LOC_Os05g02550	-2.10905
LOC_Os04g59190	2.1323	LOC_Os05g03120	-1.33565
LOC_Os05g01380	1.44507	LOC_Os05g03130	1.29276
LOC_Os05g02550	-1.4025	LOC_Os05g03460	1.23592
LOC_Os05g03120	-1.06147	LOC_Os05g03480	1.3549
LOC_Os05g03130	7.32934	LOC_Os05g04210	1.45648
LOC_Os05g03460	3.26321	LOC_Os05g04700	1.04907
LOC_Os05g03480	2.00411	LOC_Os05g05930	3.11008
LOC_Os05g04210	2.33006	LOC_Os05g06920	-1.11677
LOC_Os05g04700	2.89204	LOC_Os05g07710	1.31465
LOC_Os05g05930	7.49431	LOC_Os05g07810	1.09549
LOC_Os05g06920	-1.2294	LOC_Os05g10620	2.1956
LOC_Os05g07710	1.31726	LOC_Os05g10650	1.06062
LOC_Os05g07810	4.25108	LOC_Os05g11210	-2.109
LOC_Os05g10620	1.9067	LOC_Os05g11650	-1.23428
LOC_Os05g10650	1.09377	LOC_Os05g12040	2.34069
LOC_Os05g11210	-3.83829	LOC_Os05g12640	-2.09935
LOC_Os05g11650	-1.03692	LOC_Os05g13970	2.91723
LOC_Os05g12040	1.68869	LOC_Os05g15530	1.72795
LOC_Os05g12640	-1.10753	LOC_Os05g15770	1.23526
LOC_Os05g13970	3.30438	LOC_Os05g15880	1.47624
LOC_Os05g15530	2.35079	LOC_Os05g22614	-1.29654
LOC_Os05g15770	2.05241	LOC_Os05g23830	-1.30495
LOC_Os05g15880	1.04021	LOC_Os05g24520	-1.09718
LOC_Os05g22614	-1.59301	LOC_Os05g25370	-1.30935
LOC_Os05g23830	-1.42642	LOC_Os05g27590	2.25654
LOC_Os05g24520	-1.94495	LOC_Os05g28120	-1.08001
LOC_Os05g25370	-3.50205	LOC_Os05g28830	-3.67305
LOC_Os05g27590	-2.19919	LOC_Os05g29810	1.60367
LOC_Os05g28120	-1.76671	LOC_Os05g30220	-1.16429
LOC_Os05g28830	1.74013	LOC_Os05g33130	2.30454
LOC_Os05g29810	2.47294	LOC_Os05g33400	1.58797
LOC_Os05g30220	-2.81694	LOC_Os05g33410	3.62531
LOC_Os05g33130	4.17573	LOC_Os05g33960	2.14521
LOC_Os05g33400	2.89573	LOC_Os05g34170	-1.55148
LOC_Os05g33410	1.29174	LOC_Os05g34830	1.88007
LOC_Os05g33960	3.85756	LOC_Os05g34854	1.21478
LOC_Os05g34170	-1.61009	LOC_Os05g36260	1.76831
LOC_Os05g34830	3.31141	LOC_Os05g37050	1.27954
LOC_Os05g34854	1.15477	LOC_Os05g38790	-1.41464
LOC_Os05g36260	1.28162	LOC_Os05g39250	2.82471
LOC_Os05g37050	-1.19966	LOC_Os05g39770	1.82666
LOC_Os05g38790	-1.83468	LOC_Os05g39930	1.5546
LOC_Os05g39250	5.78338	LOC_Os05g43110	1.87458
LOC_Os05g39770	2.53862	LOC_Os05g43340	-1.42932
LOC_Os05g39930	1.32697	LOC_Os05g43390	1.13866
LOC_Os05g43110	2.26751	LOC_Os05g43640	2.18322
LOC_Os05g43340	-1.69575	LOC_Os05g45070	1.34686
LOC_Os05g43390	1.84042	LOC_Os05g45100	2.6345
LOC_Os05g43640	1.05286	LOC_Os05g46350	1.43241
LOC_Os05g45070	1.46951	LOC_Os05g46480	3.76026
LOC_Os05g45100	2.38707	LOC_Os05g46610	-1.72831
LOC_Os05g46350	3.24054	LOC_Os05g46760	1.24299
LOC_Os05g46480	7.35346	LOC_Os05g48270	-1.46097
LOC_Os05g46610	-1.31062	LOC_Os05g48810	1.20242
LOC_Os05g46760	1.82224	LOC_Os05g48900	-1.48903
LOC_Os05g48270	-1.63574	LOC_Os05g49320	-1.14462
LOC_Os05g48810	1.14346	LOC_Os05g49730	1.47448
LOC_Os05g48900	-1.64355	LOC_Os05g50300	-2.11824
LOC_Os05g49320	-1.39608	LOC_Os05g50340	-1.05056
LOC_Os05g49730	5.75239	LOC_Os05g50380	1.17048
LOC_Os05g50300	-3.51845	LOC_Os05g50570	1.80894
LOC_Os05g50340	-3.7821	LOC_Os05g51680	2.25654
LOC_Os05g50380	2.20359	LOC_Os06g02640	2.30454
LOC_Os05g50570	3.11318	LOC_Os06g03670	1.90616
LOC_Os05g51680	2.52793	LOC_Os06g03710	1.56253
LOC_Os06g02640	3.32924	LOC_Os06g03860	1.02586
LOC_Os06g03670	3.78857	LOC_Os06g04920	-1.22705
LOC_Os06g03710	1.94731	LOC_Os06g05320	1.89097
LOC_Os06g03860	1.03639	LOC_Os06g06250	-1.39986
LOC_Os06g04920	-4.76067	LOC_Os06g07790	-1.33618
LOC_Os06g05320	2.90584	LOC_Os06g08120	-1.11651
LOC_Os06g06250	-1.43439	LOC_Os06g08900	-1.21416
LOC_Os06g07790	-1.22625	LOC_Os06g09560	1.94085
LOC_Os06g08120	-1.61663	LOC_Os06g10230	1.94377
LOC_Os06g08900	-1.33976	LOC_Os06g11200	1.07048
LOC_Os06g09560	1.72876	LOC_Os06g12310	-1.14481
LOC_Os06g10230	-1.35749	LOC_Os06g12450	-2.37302
LOC_Os06g11200	2.35058	LOC_Os06g13560	1.52148
LOC_Os06g12310	-1.01448	LOC_Os06g14400	1.081
LOC_Os06g12450	-1.12615	LOC_Os06g14810	1.84729
LOC_Os06g13560	2.88122	LOC_Os06g15330	-1.15491
LOC_Os06g14400	1.32544	LOC_Os06g15630	-1.61791
LOC_Os06g14810	2.43518	LOC_Os06g16640	-1.14525
LOC_Os06g15330	-1.58377	LOC_Os06g17070	2.59802
LOC_Os06g15630	-2.12498	LOC_Os06g19260	-1.1082
LOC_Os06g16640	-1.50352	LOC_Os06g19630	2.19444
LOC_Os06g17070	1.74143	LOC_Os06g21410	1.47391
LOC_Os06g19260	-1.49118	LOC_Os06g21570	-1.01616
LOC_Os06g19630	5.26292	LOC_Os06g21820	1.30405
LOC_Os06g21410	1.41197	LOC_Os06g21910	1.87458
LOC_Os06g21570	-1.71608	LOC_Os06g23350	2.17706
LOC_Os06g21820	1.20699	LOC_Os06g24850	-1.06815
LOC_Os06g21910	6.02977	LOC_Os06g25010	1.58612
LOC_Os06g23350	6.18161	LOC_Os06g31090	1.9426
LOC_Os06g24850	-1.00526	LOC_Os06g32890	-1.40096
LOC_Os06g25010	3.47293	LOC_Os06g32900	-1.78345
LOC_Os06g31090	1.23659	LOC_Os06g32910	-1.43975
LOC_Os06g32890	-1.85921	LOC_Os06g34400	-1.04811
LOC_Os06g32900	-1.33439	LOC_Os06g35650	1.08521
LOC_Os06g32910	-1.29345	LOC_Os06g35700	2.0874
LOC_Os06g34400	1.48457	LOC_Os06g35960	1.72438
LOC_Os06g35650	1.29263	LOC_Os06g36560	1.92608
LOC_Os06g35700	-1.36737	LOC_Os06g37140	1.76618
LOC_Os06g35960	4.58516	LOC_Os06g38670	1.38352
LOC_Os06g36560	3.04474	LOC_Os06g39240	2.1469
LOC_Os06g37140	2.81311	LOC_Os06g40170	-1.04012
LOC_Os06g38670	1.7936	LOC_Os06g40930	1.8933
LOC_Os06g39240	1.41053	LOC_Os06g40940	-1.01847
LOC_Os06g40170	-1.15914	LOC_Os06g43090	1.43948
LOC_Os06g40930	-2.28255	LOC_Os06g43880	2.12838
LOC_Os06g40940	-1.81979	LOC_Os06g44160	1.1036
LOC_Os06g43090	1.41907	LOC_Os06g45184	1.71227
LOC_Os06g43880	2.07455	LOC_Os06g46740	2.60482
LOC_Os06g44160	1.72582	LOC_Os06g47100	1.9224
LOC_Os06g45184	4.01635	LOC_Os06g47200	1.0154
LOC_Os06g46740	7.95041	LOC_Os06g47270	1.03489
LOC_Os06g47100	2.74013	LOC_Os06g48020	2.04132
LOC_Os06g47200	1.41771	LOC_Os06g48210	1.17854
LOC_Os06g47270	2.88647	LOC_Os06g48240	1.52513
LOC_Os06g48020	2.87748	LOC_Os06g48560	-1.34699
LOC_Os06g48210	3.12196	LOC_Os06g49750	1.34172
LOC_Os06g48240	2.00986	LOC_Os06g50240	2.25654
LOC_Os06g48560	-1.79995	LOC_Os06g50930	1.13691
LOC_Os06g49750	-1.89556	LOC_Os06g51210	1.67897
LOC_Os06g50240	2.90149	LOC_Os07g01340	3.17254
LOC_Os06g50930	1.20997	LOC_Os07g01620	-1.54513
LOC_Os06g51210	-2.18289	LOC_Os07g02140	-1.13037
LOC_Os07g01340	1.9374	LOC_Os07g04560	1.51883
LOC_Os07g01620	-2.14365	LOC_Os07g05940	2.89826
LOC_Os07g02140	-1.64969	LOC_Os07g07790	1.05295
LOC_Os07g04560	1.84685	LOC_Os07g08350	-2.33807
LOC_Os07g05940	6.02233	LOC_Os07g09420	1.92865
LOC_Os07g07790	1.63026	LOC_Os07g11100	2.39873
LOC_Os07g08350	-1.23315	LOC_Os07g11330	-1.15708
LOC_Os07g09420	1.95833	LOC_Os07g14150	1.43252
LOC_Os07g11100	-1.64933	LOC_Os07g19140	-1.26632
LOC_Os07g11330	-3.24967	LOC_Os07g22730	2.82281
LOC_Os07g14150	1.733	LOC_Os07g23640	1.27706
LOC_Os07g19140	-1.00639	LOC_Os07g23660	1.37319
LOC_Os07g22730	1.79886	LOC_Os07g25960	1.61612
LOC_Os07g23640	4.861	LOC_Os07g25970	1.48505
LOC_Os07g23660	3.83774	LOC_Os07g26110	1.4613
LOC_Os07g25960	2.62647	LOC_Os07g26320	1.15643
LOC_Os07g25970	1.39056	LOC_Os07g27370	2.25654
LOC_Os07g26110	1.11757	LOC_Os07g27390	3.14826
LOC_Os07g26320	2.34981	LOC_Os07g28000	-1.3852
LOC_Os07g27370	1.09594	LOC_Os07g31530	1.69727
LOC_Os07g27390	4.23222	LOC_Os07g31960	-1.31642
LOC_Os07g28000	-1.70174	LOC_Os07g33440	1.93324
LOC_Os07g31530	1.74618	LOC_Os07g34070	-1.01498
LOC_Os07g31960	-2.34048	LOC_Os07g34070	-1.01498
LOC_Os07g33440	-1.22926	LOC_Os07g34280	2.9147
LOC_Os07g34070	-2.5584	LOC_Os07g34520	2.35486
LOC_Os07g34070	-2.5584	LOC_Os07g34830	-1.57118
LOC_Os07g34280	2.26156	LOC_Os07g35300	1.07331
LOC_Os07g34520	5.03498	LOC_Os07g36630	1.52343
LOC_Os07g34830	-1.98302	LOC_Os07g37210	1.00005
LOC_Os07g35300	1.56915	LOC_Os07g37240	-1.08541
LOC_Os07g36630	-1.27997	LOC_Os07g37620	1.23086
LOC_Os07g37210	2.6322	LOC_Os07g38130	1.93682
LOC_Os07g37240	-2.23107	LOC_Os07g40290	1.04852
LOC_Os07g37620	4.18842	LOC_Os07g40630	1.71469
LOC_Os07g38130	2.05333	LOC_Os07g41320	-1.81468
LOC_Os07g40290	1.44012	LOC_Os07g42160	1.43912
LOC_Os07g40630	1.41211	LOC_Os07g42834	2.16982
LOC_Os07g41320	1.94384	LOC_Os07g43240	1.90831
LOC_Os07g42160	1.64331	LOC_Os07g43560	-1.0556
LOC_Os07g42834	1.05666	LOC_Os07g43810	-1.08508
LOC_Os07g43240	2.71014	LOC_Os07g44440	2.29855
LOC_Os07g43560	-3.71308	LOC_Os07g44850	1.63975
LOC_Os07g43810	1.02976	LOC_Os07g44910	1.33243
LOC_Os07g44440	2.84968	LOC_Os07g46950	1.62916
LOC_Os07g44850	3.72127	LOC_Os07g47010	1.93432
LOC_Os07g44910	1.29358	LOC_Os07g47670	2.09426
LOC_Os07g46950	3.04276	LOC_Os07g48010	2.168
LOC_Os07g47010	3.37241	LOC_Os07g48020	2.14107
LOC_Os07g47670	2.11485	LOC_Os07g48980	-1.24969
LOC_Os07g48010	-1.97027	LOC_Os07g49200	1.41042
LOC_Os07g48020	-1.78223	LOC_Os08g01160	-1.11032
LOC_Os07g48980	-1.02453	LOC_Os08g01480	1.70352
LOC_Os08g01160	-2.02323	LOC_Os08g02030	3.58982
LOC_Os08g03630	-1.12532	LOC_Os08g03630	-1.37135
LOC_Os08g05010	-2.02916	LOC_Os08g04630	1.35674
LOC_Os08g06280	-1.16835	LOC_Os08g05010	-1.50728
LOC_Os08g07890	-1.56461	LOC_Os08g06280	-1.05704
LOC_Os08g16580	-2.61019	LOC_Os08g07730	1.80409
LOC_Os08g28670	-2.89724	LOC_Os08g07890	-1.02062
LOC_Os08g28790	-1.25835	LOC_Os08g09750	1.02404
LOC_Os08g30590	-2.61896	LOC_Os08g16580	-1.20334
LOC_Os08g34720	-1.00144	LOC_Os08g19750	-1.48082
LOC_Os08g35160	-1.72841	LOC_Os08g22370	2.17706
LOC_Os08g36920	-1.10511	LOC_Os08g22380	2.7325
LOC_Os08g37940	-2.91499	LOC_Os08g24630	3.15277
LOC_Os08g38400	-2.36542	LOC_Os08g24750	2.08908
LOC_Os08g38400	-2.36542	LOC_Os08g28670	-1.18194
LOC_Os08g41630	-1.41394	LOC_Os08g28710	1.86728
LOC_Os09g03380	-1.86141	LOC_Os08g28790	-1.19083
LOC_Os09g16950	-3.42586	LOC_Os08g30100	1.96314
LOC_Os09g19229	-1.72481	LOC_Os08g30590	-1.14151
LOC_Os09g19290	-1.73177	LOC_Os08g31280	1.72424
LOC_Os09g19300	-1.71876	LOC_Os08g34720	1.10796
LOC_Os09g19380	-2.49135	LOC_Os08g35160	1.49254
LOC_Os09g19390	-2.32036	LOC_Os08g36410	1.57528
LOC_Os09g19400	-1.74163	LOC_Os08g36740	1.94131
LOC_Os09g20880	-1.03069	LOC_Os08g36920	1.63975
LOC_Os09g25060	-2.19407	LOC_Os08g37050	1.35774
LOC_Os09g27500	-1.31226	LOC_Os08g37470	2.01789
LOC_Os09g27510	-1.127	LOC_Os08g37874	2.23554
LOC_Os09g27890	-2.3765	LOC_Os08g37940	-1.33162
LOC_Os09g29540	-2.20175	LOC_Os08g38020	-1.4583
LOC_Os09g30130	-1.2505	LOC_Os08g38400	-1.1654
LOC_Os09g31502	-1.87301	LOC_Os08g38400	-1.1654
LOC_Os09g32570	-1.0412	LOC_Os08g38600	1.71794
LOC_Os09g35010	-2.46532	LOC_Os08g39660	2.29444
LOC_Os09g35020	-3.1633	LOC_Os08g39730	2.96169
LOC_Os09g35940	-3.78792	LOC_Os08g39840	2.31468
LOC_Os09g37958	-2.44194	LOC_Os08g40270	3.03356
LOC_Os09g39050	-3.51102	LOC_Os08g40290	1.99215
LOC_Os10g01044	-1.90264	LOC_Os08g40680	3.00702
LOC_Os10g04730	-1.83296	LOC_Os08g41630	-1.28534
LOC_Os10g05120	-1.97684	LOC_Os08g41750	3.15921
LOC_Os10g05490	-2.23392	LOC_Os08g43200	2.30454
LOC_Os10g10180	-1.65012	LOC_Os08g43290	2.4473
LOC_Os10g26500	-1.8191	LOC_Os08g44340	1.31335
LOC_Os10g35030	-1.88494	LOC_Os09g03380	-1.33537
LOC_Os10g35840	-1.00193	LOC_Os09g09650	1.47503
LOC_Os10g35950	-1.64584	LOC_Os09g13650	-2.79756
LOC_Os10g36500	-2.14826	LOC_Os09g15480	2.28455
LOC_Os10g37700	-1.79542	LOC_Os09g16950	-1.18475
LOC_Os10g38540	-1.89066	LOC_Os09g17152	2.22891
LOC_Os10g38800	-2.32166	LOC_Os09g17190	1.39192
LOC_Os10g40520	-4.4354	LOC_Os09g19229	-1.17998
LOC_Os10g40810	-3.61697	LOC_Os09g19290	-1.21339
LOC_Os11g01240	-1.08484	LOC_Os09g19300	-1.26026
LOC_Os11g02540	-2.88892	LOC_Os09g19380	-2.66338
LOC_Os11g05010	-1.02235	LOC_Os09g19390	-3.95567
LOC_Os11g07020	-1.41945	LOC_Os09g19400	-2.91122
LOC_Os11g08020	-4.32474	LOC_Os09g20330	-1.89424
LOC_Os11g10290	-1.83906	LOC_Os09g20880	-1.11601
LOC_Os11g11330	-1.17822	LOC_Os09g21120	2.5144
LOC_Os11g12310	-1.42784	LOC_Os09g21710	1.68579
LOC_Os11g13890	-1.49212	LOC_Os09g25060	-2.19977
LOC_Os11g16550	-1.91956	LOC_Os09g25430	2.49619
LOC_Os11g31530	-1.22989	LOC_Os09g25700	3.09905
LOC_Os11g35960	-1.81929	LOC_Os09g27040	1.04486
LOC_Os11g36000	-6.40922	LOC_Os09g27260	1.90998
LOC_Os11g43420	-2.07964	LOC_Os09g27500	1.98472
LOC_Os11g43590	-1.02783	LOC_Os09g27510	1.33861
LOC_Os11g46000	-1.021	LOC_Os09g27890	-1.16316
LOC_Os11g46810	-2.69414	LOC_Os09g27950	1.0918
LOC_Os11g47000	-2.74558	LOC_Os09g27990	1.76273
LOC_Os11g47210	-3.2967	LOC_Os09g28180	1.47006
LOC_Os11g47220	-2.27353	LOC_Os09g29540	-1.37282
LOC_Os11g47240	-1.06258	LOC_Os09g29940	1.13261
LOC_Os12g02060	-1.58733	LOC_Os09g30130	-1.15358
LOC_Os12g02470	-1.82718	LOC_Os09g30280	2.28455
LOC_Os12g08760	-1.53784	LOC_Os09g30490	2.34464
LOC_Os12g09720	-3.27285	LOC_Os09g31478	1.00089
LOC_Os12g12390	-2.96608	LOC_Os09g31502	-1.05979
LOC_Os12g16520	-2.03111	LOC_Os09g32570	1.16679
LOC_Os12g24320	-2.07776	LOC_Os09g33530	1.05916
LOC_Os12g27254	-1.54351	LOC_Os09g34160	1.81135
LOC_Os12g36870	-1.28479	LOC_Os09g35010	2.4309
LOC_Os12g37840	-1.1484	LOC_Os09g35020	1.61812
		LOC_Os09g35780	1.70548
		LOC_Os09g35940	-1.42482
		LOC_Os09g36200	1.47793
		LOC_Os09g37200	1.33061
		LOC_Os09g37958	1.04084
		LOC_Os09g39050	-2.17339
		LOC_Os09g39760	2.27183
		LOC_Os10g01044	-1.19126
		LOC_Os10g03320	1.21089
		LOC_Os10g04730	-1.13413
		LOC_Os10g05120	-1.27529
		LOC_Os10g05490	-1.35569
		LOC_Os10g06560	-1.79035
		LOC_Os10g10180	-1.15668
		LOC_Os10g17489	1.45495
		LOC_Os10g17489	1.45495
		LOC_Os10g17940	1.93761
		LOC_Os10g19919	2.60138
		LOC_Os10g20450	2.57565
		LOC_Os10g21590	1.0593
		LOC_Os10g25040	1.81556
		LOC_Os10g25400	2.7943
		LOC_Os10g26500	1.16353
		LOC_Os10g26500	1.16353
		LOC_Os10g28120	1.22409
		LOC_Os10g29570	1.43673
		LOC_Os10g30390	2.56488
		LOC_Os10g30450	1.51789
		LOC_Os10g32658	1.46803
		LOC_Os10g33810	1.51778
		LOC_Os10g34920	1.06378
		LOC_Os10g35030	-1.05988
		LOC_Os10g35300	2.17312
		LOC_Os10g35840	-1.29323
		LOC_Os10g35950	-1.09902
		LOC_Os10g36100	1.41075
		LOC_Os10g36500	-1.07899
		LOC_Os10g36960	1.87458
		LOC_Os10g37220	2.02452
		LOC_Os10g37340	1.49625
		LOC_Os10g37660	1.28484
		LOC_Os10g37670	1.02195
		LOC_Os10g37700	-1.03106
		LOC_Os10g38000	2.39873
		LOC_Os10g38040	1.00642
		LOC_Os10g38120	1.15607
		LOC_Os10g38360	1.32476
		LOC_Os10g38470	1.88529
		LOC_Os10g38540	-1.77094
		LOC_Os10g38800	-2.28238
		LOC_Os10g40520	-1.18237
		LOC_Os10g40810	-1.05615
		LOC_Os10g40934	1.05702
		LOC_Os11g01240	-1.72319
		LOC_Os11g02240	1.02034
		LOC_Os11g02540	-2.75365
		LOC_Os11g03300	1.18334
		LOC_Os11g04560	1.08321
		LOC_Os11g05010	-1.18452
		LOC_Os11g06110	1.98189
		LOC_Os11g06770	1.20353
		LOC_Os11g06960	1.04646
		LOC_Os11g07020	-1.05247
		LOC_Os11g08020	-1.45238
		LOC_Os11g10480	1.16017
		LOC_Os11g10510	2.45361
		LOC_Os11g11330	-1.04285
		LOC_Os11g12310	-1.96898
		LOC_Os11g13890	-1.21859
		LOC_Os11g16550	-1.46643
		LOC_Os11g19864	1.02931
		LOC_Os11g23080	1.89448
		LOC_Os11g24374	1.15397
		LOC_Os11g26570	3.13273
		LOC_Os11g26750	1.48765
		LOC_Os11g26780	4.09202
		LOC_Os11g26790	3.92988
		LOC_Os11g30290	2.80887
		LOC_Os11g31530	2.58624
		LOC_Os11g35960	-1.08858
		LOC_Os11g36000	-3.13764
		LOC_Os11g38160	2.23957
		LOC_Os11g38890	2.2999
		LOC_Os11g43420	1.54637
		LOC_Os11g43590	-1.06942
		LOC_Os11g43760	2.62282
		LOC_Os11g43790	1.20545
		LOC_Os11g44340	1.19742
		LOC_Os11g45740	1.34774
		LOC_Os11g46000	-2.67417
		LOC_Os11g46810	-2.48972
		LOC_Os11g47000	-2.0689
		LOC_Os11g47210	-1.61648
		LOC_Os11g47220	-1.84752
		LOC_Os11g47240	-1.14759
		LOC_Os11g47500	1.60874
		LOC_Os11g47530	3.25408
		LOC_Os11g47590	2.66666
		LOC_Os11g47840	1.22145
		LOC_Os12g02060	2.27597
		LOC_Os12g02470	-2.8858
		LOC_Os12g03040	1.11071
		LOC_Os12g03050	2.51646
		LOC_Os12g04450	1.77394
		LOC_Os12g04890	1.46737
		LOC_Os12g08760	-1.23579
		LOC_Os12g09720	-1.1515
		LOC_Os12g12080	1.05995
		LOC_Os12g12390	-1.11221
		LOC_Os12g13640	1.27416
		LOC_Os12g15530	1.41138
		LOC_Os12g15680	2.00588
		LOC_Os12g16520	-1.05155
		LOC_Os12g17160	1.9256
		LOC_Os12g18560	1.62769
		LOC_Os12g24320	-1.4296
		LOC_Os12g24650	1.87863
		LOC_Os12g26290	3.10582
		LOC_Os12g27254	-2.62364
		LOC_Os12g27830	1.9256
		LOC_Os12g29400	1.79065
		LOC_Os12g30180	2.1617
		LOC_Os12g30824	2.4433
		LOC_Os12g36630	1.23317
		LOC_Os12g36870	-1.40857
		LOC_Os12g37519	2.11254
		LOC_Os12g37690	1.89518
		LOC_Os12g37840	-1.00164
		LOC_Os12g39400	1.58762
		LOC_Os12g42200	2.53843
		LOC_Os12g42910	1.83459
		LOC_Os12g43450	1.20118
