# Supplementary material for: Codon Usage Provide Insights into the Adaptation of Rice Genes under Stress Condition
Source: Int J Mol Sci. 2023 Jan 6;24(2):1098. doi: 10.3390/ijms24021098 (PMC9861248; doi:10.3390/ijms24021098)
Supplement: Supplementary file 1 [file ijms-24-01098-s001.zip › Supplemnetary Table S3.xlsx]

## Sheet: Abiotic stress
Supplementary Table S3. Sorting, function predication of differentially expressed genes under abiotic stress condition.
Upregulated genes
Locus_id	RAP-ID	Log2fold expression	Chr	Start	End	Description
LOC_Os01g53900	Os01g0742200	1.02204	chr01	30992411	30997180	Similar to Elongation factor EF-2 (Fragment). (Os01t0742200-01)
LOC_Os01g55940	Os01g0764800	1.10967	chr01	32221378	32225121	Indole-3-acetic acid (IAA)-amido synthetase, Disease resistance, Abiotic stress tolerance, Negative regulation of seed storability (Os01t0764800-01)
LOC_Os01g71820	Os01g0946600	1.16397	chr01	41597358	41598689	Conserved hypothetical protein. (Os01t0946600-01)
LOC_Os01g64790	Os01g0868000	1.17707	chr01	37590034	37592446	AP2/ERF transcription factor, Abiotic stress response, Salt stress response (Os01t0868000-01)
LOC_Os01g48446	Os01g0675800	1.18429	chr01	27780948	27782265	"NAM, ATAF1-2, and CUC2 (NAC) transcription factor", Drought tolerance (Os01t0675800-01)
LOC_Os01g04360	Os01g0136000	1.19741	chr01	1944276	1944948	16.9 kDa small heat shock protein (Os01t0136000-01)
LOC_Os01g04050	Os01g0132000	1.20712	chr01	1760310	1761065	Similar to Wound-induced protease inhibitor (WIP1). (Os01t0132000-01)
LOC_Os01g15340	Os01g0257300	1.219	chr01	8586157	8586941	GTP-binding protein, Homolog of AtFPF1 (Flowering Promoting Factor 1), Cell cycle regulator during root development, Regulation of root architecture and flowering (Os01t0257300-01)
LOC_Os01g08860	Os01g0184100	1.28747	chr01	4449070	4449876	Class II small heat shock protein, Positive regulation in both Xoo resistance and heat/salt tolerance (Os01t0184100-01)
LOC_Os01g04330	Os01g0135700	1.30181	chr01	1931016	1931904	Calmodulin-like protein, Calcium signalling during abiotic stress, Promotion of root growth and drought tolerance (Os01t0135700-01)
LOC_Os01g08110	Os01g0176200	1.32045	chr01	3924401	3926323	UDP-glucuronosyl/UDP-glucosyltransferase family protein. (Os01t0176200-01);UDP-glucuronosyl/UDP-glucosyltransferase family protein. (Os01t0176200-02)
LOC_Os01g50410	Os01g0699500	1.32673	chr01	28938971	28941009	Serine/threonine protein kinase domain containing protein. (Os01t0699500-01);Mitogen Activated Protein Kinase Kinase Kinase, Regulation of grain size and leaf angle, Positive regulation of brassinosteroid responses (Os01t0699500-02)
LOC_Os01g38580	Os01g0566500	1.34841	chr01	21665759	21668304	Similar to Dioxygenase RAMOSUS1. (Os01t0566500-01)
LOC_Os01g46570	Os01g0654100	1.35331	chr01	26514543	26521761	Similar to CTP synthase (EC 6.3.4.2) (UTP--ammonia ligase) (CTP synthetase). (Os01t0654100-01);CTP synthase domain containing protein. (Os01t0654100-02);Similar to CTP synthase. (Os01t0654100-03)
LOC_Os01g72460	Os01g0954000	1.3641	chr01	42018073	42019444	NADPH-dependent FMN reductase family protein. (Os01t0954000-01)
LOC_Os01g52610	Os01g0725400	1.3844	chr01	30241954	30251103	Uncharacterised protein family UPF0497, trans-membrane plant subgroup domain containing protein. (Os01t0725400-01)
LOC_Os01g42380	Os01g0609300	1.39839	chr01	24075070	24082181	PDR-type ABC transporter 9 (Os01t0609300-01);Hypothetical conserved gene. (Os01t0609300-02)
LOC_Os01g57230	Os01g0780600	1.42923	chr01	33064726	33067834	Similar to Transposon protein Mutator sub-class. (Os01t0780600-01)
LOC_Os01g02930	Os01g0119000	1.43045	chr01	1078565	1081597	Glycosyltransferase AER61, uncharacterized domain containing protein. (Os01t0119000-01);Glycosyltransferase AER61, uncharacterized domain containing protein. (Os01t0119000-02)
LOC_Os01g60020	Os01g0816100	1.43823	chr01	34692912	34694391	Plant-specific transcription factor, Regulation of hypersensitive response (HR) cell death (Os01t0816100-01)
LOC_Os01g37750	Os01g0558100	1.4756	chr01	21114757	21115731	Similar to Glutathione S-transferase TSI-1 (EC 2.5.1.18) (Glutathione S- transferase 1). (Os01t0558100-01)
LOC_Os01g64360	Os01g0863300	1.48152	chr01	37358205	37359556	Similar to MCB2 protein. (Os01t0863300-01)
LOC_Os01g51690	Os01g0714800	1.57713	chr01	29720923	29723065	WRKY transcription factor 26. (Os01t0714800-01)
LOC_Os01g27340	Os01g0370900	1.62919	chr01	15258848	15260219	Similar to Glutathione transferase. (Os01t0370900-00)
LOC_Os01g56570	Os01g0772500	1.64286	chr01	32611416	32613138	Glycosyl transferase, family 14 protein. (Os01t0772500-01)
LOC_Os01g02020	Os01g0110400	1.73038	chr01	549157	552574	Similar to Acetyl-CoA C-acetyltransferase. (Os01t0110400-01)
LOC_Os01g37810	Os01g0558700	1.74416	chr01	21150419	21151079	Conserved hypothetical protein. (Os01t0558700-01)
LOC_Os01g11150	Os01g0209700	1.80734	chr01	5968819	5972489	Similar to GA 2-oxidase 5. (Os01t0209700-01)
LOC_Os01g74370	Os01g0975000	1.82111	chr01	43078802	43080400	Protein of unknown function DUF966 family protein. (Os01t0975000-01);Protein of unknown function DUF966 family protein. (Os01t0975000-02)
LOC_Os01g40190	Os01g0584100	1.83991	chr01	22677778	22678619	Similar to hydroxyproline-rich glycoprotein family protein. (Os01t0584100-01)
LOC_Os01g48000	Os01g0670100	1.85204	chr01	27474092	27476781	S-Domain receptor like kinase-13, Response to drought in tolerant genotypes, Response to submergence, Response to Xanthomonas oryzae pv. oryzae and R. solani infection in susceptible genotypes (Os01t0670100-01)
LOC_Os01g03330	Os01g0124100	1.94378	chr01	1345118	1346047	Proteinase inhibitor I12, Bowman-Birk family protein. (Os01t0124100-01)
LOC_Os01g36790	Os01g0548600	1.95353	chr01	20464727	20466410	Protein kinase, catalytic domain domain containing protein. (Os01t0548600-01)
LOC_Os01g53260	Os01g0734000	2.00828	chr01	30604326	30608077	Similar to WRKY DNA binding protein. (Os01t0734000-01)
LOC_Os01g42410	Os01g0609900	2.02745	chr01	24107086	24115287	Similar to Pleiotropic drug resistance protein 4. (Os01t0609900-01);Similar to PDR-like ABC transporter (PDR4 ABC transporter). (Os01t0609900-02)
LOC_Os01g71830	Os01g0946700	2.06245	chr01	41603305	41604652	Similar to Glucan endo-1,3-beta-glucosidase GV (EC 3.2.1.39) ((1->3)-beta-glucan endohydrolase GV) ((1->3)-beta-glucanase isoenzyme GV) (Beta-1,3- endoglucanase GV). (Os01t0946700-01)
LOC_Os01g09100	Os01g0186000	2.07985	chr01	4572446	4573421	WRKY transcription factor 10, Negative regulation of thermotolerance (Os01t0186000-01)
LOC_Os01g62490	Os01g0842500	2.23184	chr01	36177292	36180127	Similar to Laccase (EC 1.10.3.2). (Os01t0842500-01)
LOC_Os01g59100	Os01g0805400	2.26434	chr01	34141778	34145201	Cytokinin glycosyltransferase (Os01t0805400-01)
LOC_Os01g06310	Os01g0155800	2.28828	chr01	2999576	3001139	Conserved hypothetical protein. (Os01t0155800-01)
LOC_Os01g55340	Os01g0758200	2.36859	chr01	31850541	31851617	Similar to Dof2 (Fragment). (Os01t0758200-01)
LOC_Os01g04370	Os01g0136100	2.36943	chr01	1948773	1949587	16.9 kDa class I small heat shock protein (Os01t0136100-01)
LOC_Os01g24710	Os01g0348900	2.38196	chr01	13903285	13904626	Jacalin-related mannose-binding lectin, Salinity tolerance, Resistance to M. oryzae (Os01t0348900-01)
LOC_Os01g31370	Os01g0498300	2.38338	chr01	17159733	17161535	Glycosyltransferase AER61, uncharacterized domain containing protein. (Os01t0498300-01)
LOC_Os01g47290	Os01g0661750	2.40823	chr01	27032052	27032405	Hypothetical conserved gene. (Os01t0661750-00)
LOC_Os01g50400	Os01g0699400	2.40986	chr01	28933836	28935191	Serine/threonine protein kinase domain containing protein. (Os01t0699400-01)
LOC_Os01g62980	Os01g0849000	2.47294	chr01	36484020	36484818	Hypothetical protein. (Os01t0849000-02)
LOC_Os01g12520	Os01g0225000	2.54586	chr01	6879860	6881980	Mitochondrial carrier protein domain containing protein. (Os01t0225000-00)
LOC_Os01g40280	Os01g0585100	2.59492	chr01	22742545	22747123	Similar to Integral membrane protein. (Os01t0585100-01)
LOC_Os01g28970	Os01g0386500	2.61985	chr01	16224955	16226730	Conserved hypothetical protein. (Os01t0386500-01)
LOC_Os01g20206	Os01g0307686	2.64358	chr01	11505079	11506118	Similar to embryonic abundant protein-like. (Os01t0307686-00)
LOC_Os01g03730	Os01g0128200	2.70554	chr01	1566147	1569467	Similar to Nuclease I. (Os01t0128200-01)
LOC_Os01g72530	Os01g0955100	2.70845	chr01	42074192	42074866	Calmodulin-like protein, Drought and salt tolerance (Os01t0955100-01)
LOC_Os01g52730	Os01g0727500	2.7632	chr01	30322749	30325083	A member of S40 gene family, Leaf senescence (Os01t0727500-02)
LOC_Os01g45640	Os01g0644000	2.8397	chr01	25926370	25928206	Twin-arginine translocation pathway signal domain containing protein. (Os01t0644000-01);Twin-arginine translocation pathway signal domain containing protein. (Os01t0644000-02)
LOC_Os01g09700	Os01g0192900	2.87088	chr01	5002454	5004321	1-aminocyclopropane-1-carboxylic acid synthase, Submergence response (Os01t0192900-01)
LOC_Os01g63980	Os01g0859100	3.02715	chr01	37146919	37149119	Similar to WIP1 protein (Fragment). (Os01t0859100-01)
LOC_Os01g03720	Os01g0128000	3.06723	chr01	1549241	1551011	Myb transcription factor domain containing protein. (Os01t0128000-01)
LOC_Os01g03360	Os01g0124401	3.16711	chr01	1353705	1354767	Bowman-Birk inhibitor, Defense response (Os01t0124401-01)
LOC_Os01g62610	Os01g0844300	3.20209	chr01	36253547	36256956	FK506-binding protein, Immunophilin family protein, Mediation of RNA processing, Post-transcriptional regulation of abiotic stress response (Os01t0844300-01)
LOC_Os01g16920	Os01g0276300	3.76076	chr01	9679828	9680883	Similar to Group 3 late embryogenesis abundant protein (Fragment). (Os01t0276300-01)
LOC_Os01g12820	Os01g0228500	3.78269	chr01	7095864	7097381	Harpin-induced 1 domain containing protein. (Os01t0228500-01)
LOC_Os01g62190	Os01g0839100	3.95789	chr01	36001242	36002101	Cys2/His2-type zinc finger protein, Salt tolerance (Os01t0839100-01)
LOC_Os01g06740	Os01g0160800	3.98269	chr01	3189117	3190330	Ribosome-inactivating protein, Defense against herbivorous insects (Os01t0160800-01)
LOC_Os01g64000	Os01g0859300	4.21417	chr01	37174575	37176344	bZIP transcription factor, Stress response and ABA signal transduction, Regulation of plant fertility (Os01t0859300-01);bZIP transcription factor, Stress response and ABA signal transduction, Regulation of plant fertility (Os01t0859300-02)
LOC_Os01g12660	Os01g0226400	4.22129	chr01	6970912	6976706	ATPase, AAA-type, core domain containing protein. (Os01t0226400-01)
LOC_Os01g12580	Os01g0225600	4.22749	chr01	6922127	6922762	Atypical 5C LEA (late embryogenesis abundant) protein, Multiple stress tolerance, Hg accumulation (Os01t0225600-01)
LOC_Os01g24820	Os01g0350300	4.56243	chr01	13980666	13983744	Disease resistance protein domain containing protein. (Os01t0350300-00)
LOC_Os01g42860	Os01g0615100	4.72981	chr01	24392841	24393423	Chymotrypsin protease inhibitor, Salt and osmotic stress tolerance (Os01t0615100-01)
LOC_Os01g54030	Os01g0743500	4.88017	chr01	31076571	31081251	Cytosolic NADP malic enzyme (Os01t0743500-01)
LOC_Os01g12430	Os01g0224000	4.94042	chr01	6790903	6793320	S-Domain receptor like kinase-48, Response to drought and chilling in tolerant genotypes (Os01t0224000-00)
LOC_Os01g50910	Os01g0705200	5.18375	chr01	29233040	29234256	Late embryogenesis abundant protein repeat containing protein. (Os01t0705200-01)
LOC_Os01g32780	Os01g0511100	5.23566	chr01	17990846	17993750	Universal stress protein, Response to M. oryzae attack (Os01t0511100-01)
LOC_Os01g06560	Os01g0159000	5.60698	chr01	3091435	3092698	Similar to cDNA clone:J023049H21, full insert sequence. (Os01t0159000-01)
LOC_Os01g71860	Os01g0947000	5.82367	chr01	41629302	41631696	Similar to Beta-1,3-glucanase precursor. (Os01t0947000-01)
LOC_Os01g28840	Os01g0385400	6.03151	chr01	16151562	16154044	C4-dicarboxylate transporter/malic acid transport protein family protein. (Os01t0385400-01);Similar to C4-dicarboxylate transporter/malic acid transport protein. (Os01t0385400-02)
LOC_Os02g42430	Os02g0636600	0	chr02	25523466	25524380	GRAM domain containing protein. (Os02t0636600-00)
LOC_Os02g50600	Os02g0739400	1.10738	chr02	30899582	30901300	Similar to Avr9/Cf-9 rapidly elicited protein 231 precursor. (Os02t0739400-01)
LOC_Os02g52210	Os02g0759400	1.19872	chr02	31967805	31969537	RING-type E3 ubiquitin ligase, Rice homolog of Arabidopsis T&oacute;xicos en Levadura, Negative regulation of cold stress response (Os02t0759400-01)
LOC_Os02g01100	Os02g0101000	1.23752	chr02	50308	55886	Amino acid transporter, transmembrane domain containing protein. (Os02t0101000-01);Similar to amino acid permease. (Os02t0101000-02)
LOC_Os02g32660	Os02g0528200	1.26176	chr02	19355790	19367127	Starch branching enzyme 3, Starch synthesis (Os02t0528200-01)
LOC_Os02g45420	Os02g0676800	1.32517	chr02	27621222	27622912	Similar to Dehydration responsive element binding protein 1E (DREB1E protein). (Os02t0676800-01)
LOC_Os02g48860	Os02g0720500	1.36775	chr02	29890269	29891334	Peptidase A1 domain containing protein. (Os02t0720500-01)
LOC_Os02g46910	Os02g0696500	1.36972	chr02	28622391	28624619	Concanavalin A-like lectin/glucanase domain containing protein. (Os02t0696500-01);Similar to Xyloglucan endotransglucosylase/hydrolasev protein 30 (Fragment). (Os02t0696500-02)
LOC_Os02g51350	Os02g0748300	1.52093	chr02	31444678	31447719	Similar to VMP3 protein. (Os02t0748300-01);Similar to Kelch motif family protein. (Os02t0748300-02)
LOC_Os02g45390	Os02g0676500	1.53444	chr02	27602322	27606779	Similar to OSIGBa0127A14.6 protein. (Os02t0676500-00)
LOC_Os02g32970	Os02g0532300	1.56172	chr02	19591287	19595510	Hypothetical conserved gene. (Os02t0532300-01);Alpha/beta hydrolase fold-1 domain containing protein. (Os02t0532300-02)
LOC_Os02g55890	Os02g0802500	1.57638	chr02	34210424	34214885	Vacuolar H<sup>+</sup>-pyrophosphatase, Response to anoxia (Os02t0802500-01);Similar to Proton translocating pyrophosphatase. (Os02t0802500-02)
LOC_Os02g21920	Os02g0324700	1.62022	chr02	13039013	13040252	Similar to senescence-associated protein. (Os02t0324700-01)
LOC_Os02g51290	Os02g0747500	1.62046	chr02	31407197	31409585	Similar to HVA22-like protein e (AtHVA22e). (Os02t0747500-01)
LOC_Os02g01326	Os02g0103600	1.68082	chr02	175818	179370	Protein of unknown function DUF6, transmembrane domain containing protein. (Os02t0103600-01)
LOC_Os02g48850	Os02g0720400	1.7357	chr02	29886216	29888140	Protein of unknown function DUF506, plant domain containing protein. (Os02t0720400-00)
LOC_Os02g26430	Os02g0462800	1.95262	chr02	15521497	15522722	WRKY transcription factor 42, Transcriptional repressor, Promotion of leaf senescence (Os02t0462800-01)
LOC_Os02g14480	Os02g0241100	1.96702	chr02	7975665	7978686	Protein kinase, core domain containing protein. (Os02t0241100-01)
LOC_Os02g52580	Os02g0763501	2.02564	chr02	32174923	32176156	Similar to Serine threonine kinase 1. (Os02t0763501-00)
LOC_Os02g41510	Os02g0624300	2.04006	chr02	24878777	24879932	R2R3-type MYB transcription factor, Negative regulation of cold tolerance, Maintenance of Pi homeostasis (Os02t0624300-01)
LOC_Os02g22160	Os02g0327500	2.05136	chr02	13200808	13203751	Protein of unknown function DUF266, plant family protein. (Os02t0327500-01)
LOC_Os02g12350	Os02g0214900	2.08311	chr02	6424577	6430587	Class-I type histone deacetylase, Reproductive development, Seed morphology (Os02t0214900-01);Similar to Histone deacetylase. (Os02t0214900-02)
LOC_Os02g43560	Os02g0652100	2.09724	chr02	26280287	26283888	Similar to WRKY-like DNA-binding protein. (Os02t0652100-01)
LOC_Os02g45780	Os02g0682300	2.15456	chr02	27887212	27888250	RING-type E3 ligase, Negative regulation of cuticular wax biosynthesis, Drought stress response (Os02t0682300-01)
LOC_Os02g46180	Os02g0686800	2.21771	chr02	28136347	28137459	FCS-like zinc finger (FLZ) protein 6, Submergence response (Os02t0686800-01)
LOC_Os02g12380	Os02g0215200	2.36704	chr02	6447078	6453167	Class-I type histone deacetylase, Vegetative growth (Os02t0215200-01);Similar to Histone deacetylase. (Os02t0215200-02);Similar to Histone deacetylase. (Os02t0215200-03)
LOC_Os02g32140	Os02g0521100	2.40033	chr02	18986685	18987266	Hypothetical conserved gene. (Os02t0521100-01)
LOC_Os02g02210	Os02g0112900	2.41086	chr02	679468	697321	&gamma;-aminobutyrate transaminase, Response to blast fungus infection, mechanical wounding and ultraviolet radiation (Os02t0112900-01)
LOC_Os02g40330	Os02g0616600	2.50077	chr02	24409317	24414084	Hypothetical protein. (Os02t0616600-01);Conserved hypothetical protein. (Os02t0616600-02)
LOC_Os02g09830	Os02g0191600	2.53022	chr02	5067166	5068036	Basic leucine zipper transcription factor 16, bZIP transcription factor 16, Positive regulation of drought resistance (Os02t0191600-01)
LOC_Os02g09810	Os02g0191300	2.59635	chr02	5058825	5061929	A member of the ATLa/AVT6 subfamily, Amino acid transporter-like 6 protein, Amino acid homeostasis, Modulation of the vacuolar storage of glutamine in roots (Os02t0191300-01)
LOC_Os02g36020	Os02g0568700	2.79894	chr02	21638727	21648937	Ent-kaurene synthase (KS) like diterpene synthase (Os02t0568700-01)
LOC_Os02g30100	Os02g0503900	2.80644	chr02	17873662	17875911	Cytochrome P450 family protein. (Os02t0503900-01)
LOC_Os02g42640	Os02g0639300	2.82956	chr02	25646627	25648251	Conserved hypothetical protein. (Os02t0639300-01)
LOC_Os02g52670	Os02g0764700	2.8588	chr02	32204425	32205335	Similar to Ethylene-responsive transcription factor 4 (Ethylene-responsive element binding factor 4) (Related to APETALA-2 protein 5) (EREBP-4) (AtERF4). (Os02t0764700-01)
LOC_Os02g44870	Os02g0669100	2.94053	chr02	27165514	27166898	SK<sub>3</sub>-type dehydrin, Response to abiotic stress, Drought and salt stress tolerance (Os02t0669100-01)
LOC_Os02g16940	Os02g0269600	3.16721	chr02	9650760	9656236	Similar to Subtilase. (Os02t0269600-00)
LOC_Os02g50690	Os02g0740400	3.28626	chr02	30965666	30967599	Similar to GSDL-motif lipase. (Os02t0740400-01);Lipase, GDSL domain containing protein. (Os02t0740400-02)
LOC_Os02g32520	Os02g0526400	3.29839	chr02	19251968	19256233	Caseinolytic protease regulatory ATPase module, Intrinsic chaperone, Tolerance to salt and desiccation stresses (Os02t0526400-01)
LOC_Os02g04340	Os02g0136000	3.30675	chr02	1913422	1916137	Phox/Bem1p domain containing protein. (Os02t0136000-00)
LOC_Os02g51890	Os02g0755400	3.47184	chr02	31781578	31787144	Similar to RNA recognition motif-containing protein SEB-4. (Os02t0755400-01)
LOC_Os02g51930	Os02g0755900	3.79538	chr02	31805977	31807800	UDP-glucuronosyl/UDP-glucosyltransferase domain containing protein. (Os02t0755900-01)
LOC_Os02g41840	Os02g0629000	3.91258	chr02	25153298	25154265	Protein of unknown function DUF584 family protein. (Os02t0629000-01)
LOC_Os02g54254	Os02g0783700	4.04019	chr02	33253386	33264913	Similar to Lysine ketoglutarate reductase/saccharopine dehydrogenase. (Os02t0783700-01);Lysine ketoglutarate reductase/saccharopine dehydrogenase, Lysine-degrading enzyme in developing grain (Os02t0783700-02)
LOC_Os02g52590	Os02g0763800	4.17942	chr02	32177755	32179122	Xyloglucan fucosyltransferase domain containing protein. (Os02t0763800-01)
LOC_Os02g12680	Os02g0218700	5.30299	chr02	6628383	6630103	Allene oxide synthase (CYP74A3), Fatty acid 9-/13-hydroperoxide lyase (CYP74C), Biosynthesis of jasmonic acid (JA), Plant defense (Os02t0218700-01)
LOC_Os02g07170	Os02g0168200	5.41459	chr02	3682192	3684126	Similar to Transfactor-like protein. (Os02t0168200-01)
LOC_Os02g43330	Os02g0649300	5.65222	chr02	26143311	26144729	HD-ZIP I protein, Transcription activator, Stress response, Panicle development (Os02t0649300-01)
LOC_Os02g26720	Os02g0466400	5.96229	chr02	15697843	15699151	Similar to Inositol phosphate kinase. (Os02t0466400-01)
LOC_Os03g14370	Os03g0247900	1.04237	chr03	7815147	7817732	ACT domain repeat protein 9 (Os03t0247900-01)
LOC_Os03g03034	Os03g0122300	1.04704	chr03	1235460	1244932	Flavanone 3-hydroxylase, Salicylic acid hydroxylase 1, Positive regulation of flavonoid biosynthesis, Resistance to brown planthopper (BPH) (Os03t0122300-01);Similar to Oxidoreductase, 2OG-Fe oxygenase family protein, expressed. (Os03t0122300-02)
LOC_Os03g10800	Os03g0205700	1.08285	chr03	5530670	5534319	BTB domain containing protein. (Os03t0205700-01);Photoreceptor-interacting protein-like. (Os03t0205700-02)
LOC_Os03g58850	Os03g0803066	1.11461	chr03	33512945	33513227	Non-protein coding transcript. (Os03t0803066-01)
LOC_Os03g43880	Os03g0640000	1.13916	chr03	24616417	24617859	Patatin family protein. (Os03t0640000-00)
LOC_Os03g16670	Os03g0273800	1.15666	chr03	9202541	9204642	HAD-superfamily hydrolase, subfamily IA, variant 3 domain containing protein. (Os03t0273800-01)
LOC_Os03g18030	Os03g0289800	1.15736	chr03	10039387	10044161	Similar to Leucoanthocyanidin dioxygenase-like protein. (Os03t0289800-01)
LOC_Os03g41390	Os03g0610400	1.17063	chr03	23036335	23037381	Zinc finger, C2H2-like domain containing protein. (Os03t0610400-01)
LOC_Os03g22790	Os03g0351300	1.17428	chr03	13162037	13163727	Similar to beta-amylase. (Os03t0351300-00)
LOC_Os03g60080	Os03g0815100	1.20075	chr03	34166100	34167521	NAC-domain transcription factor, Response to infection by M. grisea, MeJA-mediated signaling pathway, Drought and salinitytolerance (Os03t0815100-01)
LOC_Os03g09910	Os03g0195100	1.28949	chr03	4936472	4941037	Putative aminotransferase, Disease resistance response against infection with rice blast fungus (Os03t0195100-01)
LOC_Os03g22020	Os03g0339400	1.40176	chr03	12618079	12619711	Haem peroxidase, plant/fungal/bacterial family protein. (Os03t0339400-01)
LOC_Os03g52370	Os03g0734100	1.40235	chr03	30074926	30075707	Conserved hypothetical protein. (Os03t0734100-01);Conserved hypothetical protein. (Os03t0734100-02)
LOC_Os03g22820	Os03g0351700	1.46318	chr03	13189478	13190315	Conserved hypothetical protein. (Os03t0351700-01)
LOC_Os03g06250	Os03g0158600	1.47172	chr03	3132124	3132741	Hypothetical conserved gene. (Os03t0158600-00)
LOC_Os03g32230	Os03g0437200	1.50443	chr03	18435990	18437086	C2H2-type zinc finger protein, Abscisic acid-induced antioxidant defence, Water stress and oxidative stress tolerance (Os03t0437200-01)
LOC_Os03g16030	Os03g0267000	1.51533	chr03	8834869	8835576	Small heat shock protein, Heavy metal resistance, Regulation of Cu tolerance, Regulation of bacterial leaf streak (BLS) and bacterial blight (BB) resistance (Os03t0267000-01)
LOC_Os03g61500	Os03g0830500	1.57064	chr03	34883520	34884578	FW2.2-like (FWL) family protein, Regulation of cadmium and micronutrient metal accumulation (Os03t0830500-01)
LOC_Os03g15270	Os03g0258200	1.5995	chr03	8352195	8353718	Alpha/beta hydrolase fold-3 domain containing protein. (Os03t0258200-01)
LOC_Os03g64260	Os03g0860100	1.60438	chr03	36301491	36302407	Ethylene response factor, Transcriptional activator, Positive regulation of disease resistance (Os03t0860100-01)
LOC_Os03g13140	Os03g0233900	1.7693	chr03	7092864	7093988	Non-symbiotic hemoglobin, Phytoglobin, Response to low mineral nutrients and abiotic stresses (Os03t0233900-01)
LOC_Os03g18970	Os03g0301700	1.92943	chr03	10621704	10625395	Similar to Calmodulin-binding protein phosphatase. (Os03t0301700-01);Similar to Calmodulin-binding protein phosphatase. (Os03t0301700-02)
LOC_Os03g58764	Os03g0802100	2.06042	chr03	33465890	33467951	Similar to F-box domain containing protein, expressed. (Os03t0802100-01)
LOC_Os03g26910	Os03g0386500	2.06469	chr03	15381800	15384276	Similar to Trehalose-6-phosphate phosphatase. (Os03t0386500-01)
LOC_Os03g07170	Os03g0168000	2.10351	chr03	3674285	3678314	Major facilitator superfamily, general substrate transporter domain containing protein. (Os03t0168000-01)
LOC_Os03g09170	Os03g0191900	2.11296	chr03	4780248	4781570	Pathogenesis-related transcriptional factor and ERF domain containing protein. (Os03t0191900-01)
LOC_Os03g48750	Os03g0693700	2.25603	chr03	27779100	27780096	Similar to Oxalate oxidase 1 (EC 1.2.3.4) (Germin). (Os03t0693700-01)
LOC_Os03g57960	Os03g0793700	2.27612	chr03	33020035	33022850	Cupin domain protein, Regulation of seed vigour (Os03t0793700-01)
LOC_Os03g07930	Os03g0176100	2.31747	chr03	4047742	4050253	Similar to predicted protein. (Os03t0176100-00)
LOC_Os03g56010	Os03g0770000	2.31902	chr03	31885024	31885617	bZIP transcription factor, bZIP-1 domain containing protein. (Os03t0770000-00)
LOC_Os03g22680	Os03g0348900	2.32362	chr03	13095799	13098282	Similar to CHY zinc finger family protein, expressed. (Os03t0348900-01);Ring finger E3 ubiquitin ligase, Abiotic stress tolerance (Os03t0348900-02)
LOC_Os03g56060	Os03g0770800	2.42105	chr03	31930835	31934477	CSLC9. (Os03t0770800-01)
LOC_Os03g25760	Os03g0374500	2.76784	chr03	14739099	14741603	IQ-motif containing protein 3, Response to PEG, NaCl, ABA and MeJA stress (Os03t0374500-01)
LOC_Os03g63390	Os03g0850900	2.93589	chr03	35820760	35821517	Similar to Chemocyanin precursor (Basic blue protein) (Plantacyanin). (Os03t0850900-01)
LOC_Os03g57640	Os03g0790500	2.94234	chr03	32851444	32852765	Alpha/beta hydrolase fold-3 domain containing protein. (Os03t0790500-01)
LOC_Os03g59460	Os03g0809200	2.9871	chr03	33844223	33845580	Similar to Transcription factor EmBP-1 (Fragment). (Os03t0809200-01)
LOC_Os03g57720	Os03g0791200	3.09296	chr03	32897226	32898262	Similar to Aldehyde oxidase 1 (Fragment). (Os03t0791200-00)
LOC_Os03g16920	Os03g0277300	3.13119	chr03	9411494	9416082	Heat shock protein 70. (Os03t0277300-01)
LOC_Os03g43750	Os03g0638400	3.13251	chr03	24466606	24473558	Similar to OSIGBa0153E02-OSIGBa0093I20.19 protein. (Os03t0638400-01)
LOC_Os03g20550	Os03g0321700	3.14661	chr03	11650891	11652144	WRKY transcription factor, Component in the signal transduction pathways of auxin response, Disease resistance (Os03t0321700-01)
LOC_Os03g12820	Os03g0230300	3.20553	chr03	6895178	6898355	Homologue of SRO (similar to RCD one), Regulation of stomatal closure, Abiotic stress response (Os03t0230300-01);Non-protein coding transcript. (Os03t0230300-02)
LOC_Os03g50490	Os03g0712800	3.28593	chr03	28822424	28826321	Cytosolic glutamine synthetase, Early stage of seed germination and grain filling under N deficient conditions (Os03t0712800-02)
LOC_Os03g33520	Os03g0448200	3.30962	chr03	19147007	19148677	Similar to Exo70 exocyst complex subunit family protein. (Os03t0448200-00)
LOC_Os03g28090	Os03g0399000	3.336	chr03	16151375	16153554	Pectin lyase fold domain containing protein. (Os03t0399000-01)
LOC_Os03g60370	Os03g0818100	3.34997	chr03	34334756	34340133	Histidine acid phosphatase (HAP)-type phytase, Degradation of the phytins during the seed germination (Os03t0818100-01);Similar to Multiple inositol polyphosphate phosphatase PhyIIa2. (Os03t0818100-02)
LOC_Os03g17870	Os03g0288000	3.36466	chr03	9957175	9958291	Type 1 metallothionein isoform, Positive regulation of resistance to blast disease (Os03t0288000-01);Similar to Metallothionein. (Os03t0288000-02)
LOC_Os03g48770	Os03g0693900	3.59279	chr03	27788230	27788913	Oxalate oxidase 3, Positive regulation of panicle blast resistance (Os03t0693900-01)
LOC_Os03g61360	Os03g0829200	3.65722	chr03	34825502	34828944	Similar to Soluble epoxide hydrolase. (Os03t0829200-01);Similar to epoxide hydrolase 2. (Os03t0829200-02)
LOC_Os03g36279	Os03g0561400	3.8805	chr03	20124488	20127262	Conserved hypothetical protein. (Os03t0561400-01)
LOC_Os03g60560	Os03g0820300	4.19878	chr03	34424180	34425030	TFIIIA-type zinc finger protein, Transcription activator, Abiotic stress tolerance (Os03t0820300-01)
LOC_Os03g19290	Os03g0305600	4.42753	chr03	10848558	10849987	Mitochondrial import inner membrane translocase, subunit Tim17/22 family protein. (Os03t0305600-01)
LOC_Os03g60570	Os03g0820400	4.60703	chr03	34427704	34428391	Similar to ZPT2-13. (Os03t0820400-01)
LOC_Os03g17790	Os03g0286900	4.65901	chr03	9899776	9900385	RCI2 (rare cold-inducible 2) family protein, Drought resistance (Os03t0286900-01)
LOC_Os03g27110	Os03g0388800	4.67277	chr03	15528226	15530171	Similar to Hydrolase. (Os03t0388800-01)
LOC_Os03g07180	Os03g0168100	6.28257	chr03	3678292	3679969	Late embryogenesis abundant protein repeat containing protein. (Os03t0168100-01)
LOC_Os03g18490	Os03g0296200	6.54421	chr03	10366901	10368154	Conserved hypothetical protein. (Os03t0296200-00)
LOC_Os04g56030	Os04g0654400	1.02863	chr04	33374335	33375212	Eggshell protein family protein. (Os04t0654400-01)
LOC_Os04g39980	Os04g0475600	1.04145	chr04	23795593	23797531	2-oxoglutarate-dependent-Fe (II) dioxygenase, Anther dehiscence, Pollen fertility, Seed initiation, Maintenance of auxin homeostasis in reproductive organs (Os04t0475600-01)
LOC_Os04g43440	Os04g0514600	1.07206	chr04	25708429	25712602	Similar to NBS-LRR type disease resistance protein O2 (Fragment). (Os04t0514600-00)
LOC_Os04g25650	Os04g0322100	1.15532	chr04	14863727	14864824	Protein of unknown function DUF26 domain containing protein. (Os04t0322100-01)
LOC_Os04g32480	Os04g0395800	1.1591	chr04	19492605	19497140	Tify domain containing protein. (Os04t0395800-01)
LOC_Os04g58190	Os04g0678400	1.16469	chr04	34655316	34656735	DOF transcription factor 17, Transcriptional activator, Regulation of grain quality (Os04t0678400-01)
LOC_Os04g34490	Os04g0422300	1.19518	chr04	20882277	20885593	Protein of unknown function DUF6, transmembrane domain containing protein. (Os04t0422300-01)
LOC_Os04g10569	Os04g0184500	1.27201	chr04	5739476	5740015	Similar to OSIGBa0148J22.3 protein. (Os04t0184500-00)
LOC_Os04g50790	Os04g0594400	1.27613	chr04	30046907	30050579	Aldo/keto reductase domain containing protein. (Os04t0594400-01)
LOC_Os04g30260	Os04g0371100	1.30872	chr04	18061313	18064800	Similar to OSIGBa0134J07.7 protein. (Os04t0371100-00)
LOC_Os04g52810	Os04g0619000	1.32213	chr04	31439595	31443397	Similar to L1332.9 protein. (Os04t0619000-01)
LOC_Os04g35270	Os04g0432300	1.37077	chr04	21447893	21449455	Similar to 4-alpha-L-fucosyltransferase. (Os04t0432300-00)
LOC_Os04g55980	Os04g0653700	1.37138	chr04	33347881	33348507	Conserved hypothetical protein. (Os04t0653700-01)
LOC_Os04g35250	Os04g0432100	1.38266	chr04	21424187	21425721	Transcription factor GRAS domain containing protein. (Os04t0432100-00)
LOC_Os04g43680	Os04g0517100	1.44223	chr04	25843038	25844912	Similar to OSIGBa0145M07.4 protein. (Os04t0517100-01);SG2-type MYB transcription factor, Cold tolerance, Resistance to fungal and bacterial pathogens, Panicle development (Os04t0517100-02)
LOC_Os04g58850	Os04g0685300	1.44444	chr04	35001018	35002142	Harpin-induced 1 domain containing protein. (Os04t0685300-02)
LOC_Os04g37490	Os04g0447700	1.47404	chr04	22323860	22326881	Similar to Polyketide reductase. (Os04t0447700-01)
LOC_Os04g44550	Os04g0527700	1.53423	chr04	26372064	26375184	CHCH domain containing protein. (Os04t0527700-01)
LOC_Os04g51160	Os04g0600300	1.56878	chr04	30291463	30293040	Homodimeric diiron-carboxylate protein, Cyanide-resistant respiration in mitochondria, Reactive oxygen species (ROS) scavenging (Os04t0600300-01)
LOC_Os04g13210	Os04g0209200	1.6192	chr04	7301574	7313221	C-type ABC transporter, Cadmium tolerance and accumulation (Os04t0209200-01)
LOC_Os04g56040	Os04g0654500	1.65342	chr04	33377245	33378457	Conserved hypothetical protein. (Os04t0654500-01)
LOC_Os04g50940	Os04g0597600	1.65478	chr04	30156252	30159310	Nitrate transporter, Regulation of tiller number and grain yield (Os04t0597600-01);Nitrate transporter, Regulation of tiller number and grain yield (Os04t0597600-02)
LOC_Os04g49360	Os04g0583000	1.71873	chr04	29454845	29459592	Conserved hypothetical protein. (Os04t0583000-01)
LOC_Os04g57810	Os04g0674400	1.75076	chr04	34423647	34426231	Rice ortholog of yeast Dre2 and human Anamorsin, Regulation of chitin-induced immune responses (Os04t0674400-01)
LOC_Os04g56470	Os04g0659800	1.81118	chr04	33658425	33664069	Similar to OSIGBa0132E09-OSIGBa0108L24.20 protein. (Os04t0659800-00)
LOC_Os04g51150	Os04g0600200	1.82494	chr04	30287197	30289860	Homodimeric diiron-carboxylate protein, Cyanide-resistant respiration in mitochondria, Reactive oxygen species (ROS) scavenging (Os04t0600200-01)
LOC_Os04g53994	Os04g0631800	1.86634	chr04	32173571	32177352	S-Domain kinase-6, Response to drought in tolerant genotype, Response to Xanthomonas oryzae pv. Oryzae and R. solani. (Os04t0631800-00)
LOC_Os04g46970	Os04g0556400	1.90738	chr04	27843255	27845708	Similar to UDP-glycosyltransferase UGT93B9. (Os04t0556400-01)
LOC_Os04g55720	Os04g0650800	2.12417	chr04	33167054	33169881	3-phosphoglycerate dehydrogenase 1, Serine biosynthesis (Os04t0650800-01);Similar to H0212B02.14 protein. (Os04t0650800-02)
LOC_Os04g59190	Os04g0688300	2.1323	chr04	35207157	35208610	Haem peroxidase, plant/fungal/bacterial family protein. (Os04t0688300-01)
LOC_Os04g01740	Os04g0107900	2.26014	chr04	483234	485978	Similar to Heat shock protein 82. (Os04t0107900-01);Heat shock protein 81-1 (HSP81-1) (Heat shock protein 83). (Os04t0107900-02);Similar to Heat shock protein 80. (Os04t0107900-03);Similar to Heat shock protein 82. (Os04t0107900-04);Non-protein coding transcript. (Os04t0107900-05)
LOC_Os04g45700	Os04g0540300	2.60266	chr04	27032815	27034819	COBRA-like protein 7. (Os04t0540300-00)
LOC_Os04g32320	Os04g0394100	2.65237	chr04	19373688	19376820	Similar to H0718E12.3 protein. (Os04t0394100-00)
LOC_Os04g12970	Os04g0206600	2.69702	chr04	7156820	7159820	UDP-glucosyltransferase, Detoxification of deoxynivalenol (Os04t0206600-01)
LOC_Os04g56430	Os04g0659300	3.50161	chr04	33641298	33642277	Receptor-like protein, Root development, Salt stress response, Regulation of iron acquisition (Os04t0659300-01)
LOC_Os04g45590	Os04g0538900	3.51718	chr04	26975483	26976420	Glyoxalase/bleomycin resistance protein/dioxygenase domain containing protein. (Os04t0538900-00)
LOC_Os04g34970	Os04g0429050	3.99195	chr04	21248865	21249599	Similar to OSIGBa0093L02.1 protein. (Os04t0429050-00)
LOC_Os04g40990	Os04g0486950	4.20712	chr04	24325769	24328250	Similar to Malate synthase. (Os04t0486950-01)
LOC_Os04g38680	Os04g0460300	4.58256	chr04	22977821	22980329	Amino acid transporter, transmembrane domain containing protein. (Os04t0460300-01)
LOC_Os04g40070	Os04g0476600	4.59569	chr04	23859323	23863234	C2 calcium-dependent membrane targeting domain containing protein. (Os04t0476600-01)
LOC_Os04g33820	Os04g0414500	4.77298	chr04	20485797	20487086	Similar to H0622F05.2 protein. (Os04t0414500-01)
LOC_Os04g49980	Os04g0589800	5.3447	chr04	29811954	29812662	Late embryogenesis abundant (LEA) group 1 family protein. (Os04t0589800-01)
LOC_Os04g43200	Os04g0511200	6.42774	chr04	25563419	25565153	Caleosin peroxygenase, Calcium-binding and phospholipid-binding protein, Negative regulation of salt stress tolerance (Os04t0511200-01)
LOC_Os04g52110	Os04g0610600	8.55712	chr04	30950939	30952114	Similar to Cor14b protein precursor. (Os04t0610600-01)
LOC_Os05g15880	Os05g0247800	1.04021	chr05	8959416	8960566	Xylanase inhibitor protein, Defence response (Os05t0247800-01)
LOC_Os05g43640	Os05g0512100	1.05286	chr05	25379290	25380110	Uncharacterised conserved protein UCP031279 domain containing protein. (Os05t0512100-00)
LOC_Os05g10650	Os05g0194900	1.09377	chr05	5814320	5815467	Similar to Pyrophosphate-fructose-6-phosphate 1-phosphotransferase-like protein (Pyrophosphate-dependent phosphofructo-1-kinase-like protein). (Os05t0194900-01)
LOC_Os05g48810	Os05g0562300	1.14346	chr05	27972462	27974607	Similar to DnaJ-like protein. (Os05t0562300-01)
LOC_Os05g34854	Os05g0421900	1.15477	chr05	20685488	20692048	GA 20-oxidase4, GA metabolism (Os05t0421900-00)
LOC_Os05g36260	Os05g0438500	1.28162	chr05	21491943	21493609	Similar to Soluble inorganic pyrophosphatase (EC 3.6.1.1) (Pyrophosphate phospho- hydrolase) (PPase). (Os05t0438500-01)
LOC_Os05g33410	Os05g0403000	1.29174	chr05	19634463	19635893	Peptidase aspartic, catalytic domain containing protein. (Os05t0403000-01)
LOC_Os05g07710	Os05g0169200	1.31726	chr05	4144983	4148965	WD40 repeat-like domain containing protein. (Os05t0169200-01)
LOC_Os05g39930	Os05g0476700	1.32697	chr05	23463142	23465536	U-box E3ubiquitin ligase, Positive regulation of cold stress response (Os05t0476700-01)
LOC_Os05g01380	Os05g0104200	1.44507	chr05	230784	231999	Polygalacturonase inhibiting protein, Inhibitor of fungal polygalacturonase, Sheath blight resistance (Os05t0104200-01)
LOC_Os05g45070	Os05g0526700	1.46951	chr05	26189646	26190616	Harpin-induced 1 domain containing protein. (Os05t0526700-01)
LOC_Os05g12040	Os05g0211100	1.68869	chr05	6882735	6884876	Similar to Cytochrome P450-like protein. (Os05t0211100-01);Obtusifoliol 14a-demethylase, Phytosterol and Brassinosteroid biosynthesis (Os05t0211100-02)
LOC_Os05g28830	Os05g0356700	1.74013	chr05	16897434	16899135	Protein of unknown function DUF231, plant domain containing protein. (Os05t0356700-01)
LOC_Os05g46760	Os05g0545400	1.82224	chr05	27075999	27077365	Serine/threonine protein kinase domain containing protein. (Os05t0545400-01)
LOC_Os05g43390	Os05g0509500	1.84042	chr05	25229702	25233200	Similar to Signal recognition particle 54 kDa protein 2 (SRP54). (Os05t0509500-01)
LOC_Os05g10620	Os05g0194500	1.9067	chr05	5784144	5789558	Similar to ANAC075. (Os05t0194500-01)
LOC_Os05g03480	Os05g0125500	2.00411	chr05	1470049	1473944	Similar to Isovaleryl-CoA dehydrogenase, mitochondrial precursor (EC 1.3.99.10) (IVD). (Os05t0125500-01)
LOC_Os05g15770	Os05g0247100	2.05241	chr05	8902501	8903789	Similar to Glycosyl hydrolases family 18. (Os05t0247100-01);Chitinase III protein, Xylanase inhibitor, Regulation of abiotic stress response, Resistance to herbivores (Os05t0247100-02)
LOC_Os05g50380	Os05g0580000	2.20359	chr05	28871794	28877277	Chloroplastic/amyloplastic ADP-glucose pyrophosphorylase large subunit, Starch synthesis in the early stage of developing endosperm, Stem starch accumulation (Os05t0580000-01)
LOC_Os05g43110	Os05g0506700	2.26751	chr05	25029800	25030728	0
LOC_Os05g04210	Os05g0132700	2.33006	chr05	1907665	1909355	Similar to R2R3 Myb-like protein. (Os05t0132700-01)
LOC_Os05g15530	Os05g0244700	2.35079	chr05	8785502	8787555	Aminotransferase, class IV family protein. (Os05t0244700-01);Aminotransferase, class IV family protein. (Os05t0244700-02)
LOC_Os05g45100	Os05g0527000	2.38707	chr05	26198411	26200034	UDP-glucuronosyl/UDP-glucosyltransferase family protein. (Os05t0527000-01)
LOC_Os05g29810	Os05g0361700	2.47294	chr05	17246987	17248234	Similar to EREBP-2 protein (Fragment). (Os05t0361700-01);Similar to ethylene responsive element binding protein 2. (Os05t0361700-02)
LOC_Os05g51680	Os05g0595200	2.52793	chr05	29634921	29638262	Allergen V5/Tpx-1 related family protein. (Os05t0595200-01);Similar to allergen V5/Tpx-1-related family protein. (Os05t0595200-02)
LOC_Os05g39770	Os05g0475400	2.53862	chr05	23356169	23360022	Similar to Alanine:glyoxylate aminotransferase-like protein (Fragment). (Os05t0475400-01);Aminotransferase, Regulation of abiotic stress responses (Os05t0475400-02)
LOC_Os05g04700	Os05g0138300	2.89204	chr05	2219581	2220618	Similar to ICT protein (Fragment). (Os05t0138300-01);Hydrophobic protein homologous to Arabidopsis RCI2, Cold stress-response (Os05t0138300-03)
LOC_Os05g33400	Os05g0402900	2.89573	chr05	19631965	19633439	Similar to EDGP. (Os05t0402900-01)
LOC_Os05g50570	Os05g0582500	3.11318	chr05	28995973	28997546	Peptidase S10, serine carboxypeptidase domain containing protein. (Os05t0582500-01)
LOC_Os05g46350	Os05g0541100	3.24054	chr05	26863363	26866131	IQ calmodulin-binding region domain containing protein. (Os05t0541100-01)
LOC_Os05g03460	Os05g0125300	3.26321	chr05	1461362	1463780	Similar to Receptor protein kinase-like protein. (Os05t0125300-00)
LOC_Os05g13970	Os05g0228000	3.30438	chr05	7775450	7780974	Purine and other phosphorylases, family 1 protein. (Os05t0228000-01);Purine and other phosphorylases, family 1 protein. (Os05t0228000-02)
LOC_Os05g34830	Os05g0421600	3.31141	chr05	20678578	20680160	No apical meristem (NAM) protein domain containing protein. (Os05t0421600-01)
LOC_Os05g33960	Os05g0410500	3.85756	chr05	20045195	20049272	TGF-beta receptor, type I/II extracellular region family protein. (Os05t0410500-01)
LOC_Os05g33130	Os05g0399300	4.17573	chr05	19426432	19427874	Class I chitinase, Defense against fungal pathogens (Os05t0399300-01)
LOC_Os05g07810	Os05g0170200	4.25108	chr05	4205610	4207693	Similar to Universal stress protein. (Os05t0170200-01);Similar to universal stress protein family protein. (Os05t0170200-02)
LOC_Os05g49730	Os05g0572700	5.75239	chr05	28523815	28526025	Similar to protein phosphatase 2C ABI1. (Os05t0572700-01);Similar to Protein phosphatase 2C. (Os05t0572700-02)
LOC_Os05g39250	Os05g0468800	5.78338	chr05	23013524	23014346	Phosphatidylethanolamine-binding protein PEBP domain containing protein. (Os05t0468800-01)
LOC_Os05g03130	Os05g0122700	7.32934	chr05	1246357	1247008	Similar to Low-temperature induced protein lt101.2. (Os05t0122700-01)
LOC_Os05g46480	Os05g0542500	7.35346	chr05	26927607	26928882	Similar to Isoform 2 of Late embryogenesis abundant protein, group 3. (Os05t0542500-01);Late embryogenesis abundant (LEA) protein, Drought and salt stress response (Os05t0542500-02)
LOC_Os05g05930	Os05g0151200	7.49431	chr05	2969525	2970353	TspO/MBR-related protein family protein. (Os05t0151200-01)
LOC_Os06g03860	Os06g0129400	1.03639	chr06	1554861	1561163	Splicing variant of SPX-MFS protein 3 (Os06t0129400-01);Vacuolar phosphate efflux transporter, Pi homeostasis (Os06t0129400-02)
LOC_Os06g21820	Os06g0323100	1.20699	chr06	12604824	12606640	Similar to H1005F08.18 protein. (Os06t0323100-01)
LOC_Os06g50930	Os06g0725000	1.20997	chr06	30823392	30825734	Similar to Senescence-associated protein DIN1. (Os06t0725000-01)
LOC_Os06g31090	Os06g0507300	1.23659	chr06	18079011	18079819	Similar to GAMYB-binding protein. (Os06t0507300-01)
LOC_Os06g35650	Os06g0549600	1.29263	chr06	20808194	20810005	FAD-linked oxidase, FAD-binding, subdomain 2 domain containing protein. (Os06t0549600-01)
LOC_Os06g14400	Os06g0255100	1.32544	chr06	8038476	8041831	2OG-Fe(II) oxygenase domain containing protein. (Os06t0255100-01)
LOC_Os06g39240	Os06g0592500	1.41053	chr06	23293383	23294073	Similar to Ethylene-responsive transcriptional coactivator. (Os06t0592500-01)
LOC_Os06g21410	Os06g0319133	1.41197	chr06	12366482	12367048	Arabinogalactan protein homologue (Os06t0319133-01)
LOC_Os06g47200	Os06g0686400	1.41771	chr06	28617447	28620310	Bifunctional inhibitor/plant lipid transfer protein/seed storage domain containing protein. (Os06t0686400-01);Bifunctional inhibitor/plant lipid transfer protein/seed storage domain containing protein. (Os06t0686400-02)
LOC_Os06g43090	Os06g0637500	1.41907	chr06	25899446	25900813	MYB transcription factor, Regulation of leaf senescence (Os06t0637500-02)
LOC_Os06g34400	Os06g0534900	1.48457	chr06	20019320	20019976	Hypothetical conserved gene. (Os06t0534900-00)
LOC_Os06g44160	Os06g0650900	1.72582	chr06	26646375	26647794	Conserved hypothetical protein. (Os06t0650900-01);Heat shock protein DnaJ family protein. (Os06t0650900-02)
LOC_Os06g09560	Os06g0195800	1.72876	chr06	4868189	4870144	Similar to DNAJ heat shock N-terminal domain-containing protein. (Os06t0195800-01)
LOC_Os06g38670	Os06g0586150	1.7936	chr06	22958561	22962173	Protein kinase, catalytic domain domain containing protein. (Os06t0586150-00)
LOC_Os06g03710	Os06g0127800	1.94731	chr06	1465500	1468583	GAI-RGA-SCR (GRAS) family protein, Brassinosteroid signaling (Os06t0127800-01)
LOC_Os06g48240	Os06g0697500	2.00986	chr06	29180264	29181822	ATPase, AAA-type, core domain containing protein. (Os06t0697500-00)
LOC_Os06g43880	Os06g0646900	2.07455	chr06	26435460	26439235	Similar to Homogentisic acid geranylgeranyl transferase. (Os06t0646900-01);Homogentisate geranylgeranyl transferase, Tocotrienol (vitamin E) biosynthesis (Os06t0646900-02)
LOC_Os06g11200	Os06g0215500	2.35058	chr06	5878574	5880549	Similar to Oxo-phytodienoic acid reductase. (Os06t0215500-01)
LOC_Os06g14810	Os06g0260500	2.43518	chr06	8408770	8410450	Similar to 3-ketoacyl-CoA synthase. (Os06t0260500-00)
LOC_Os06g47100	Os06g0684900	2.74013	chr06	28547607	28549831	F-box domain, Skp2-like domain containing protein. (Os06t0684900-00)
LOC_Os06g48020	Os06g0695400	2.87748	chr06	29035686	29038182	Haem peroxidase family protein. (Os06t0695400-01)
LOC_Os06g13560	Os06g0244000	2.88122	chr06	7480272	7482194	Similar to anthranilic acid methyltransferase 3. (Os06t0244000-01)
LOC_Os06g47270	Os06g0687200	2.88647	chr06	28652793	28654123	Putative RING E3 ubiquitin (Ub) ligase, Negative regulator of drought and salt stress responses, Positive factor of cold stress response (Os06t0687200-01)
LOC_Os06g50240	Os06g0716200	2.90149	chr06	30420082	30422542	Thaumatin, pathogenesis-related family protein. (Os06t0716200-01)
LOC_Os06g05320	Os06g0145600	2.90584	chr06	2394821	2396562	Transferase family protein. (Os06t0145600-01)
LOC_Os06g36560	Os06g0561000	3.04474	chr06	21478477	21482381	Myo-inositol oxygenase, Drought stress tolerance (Os06t0561000-01)
LOC_Os06g48210	Os06g0697200	3.12196	chr06	29163800	29166676	DEAD-box protein abstrakt. (Os06t0697200-00)
LOC_Os06g02640	Os06g0116933	3.32924	chr06	937904	938638	Conserved hypothetical protein. (Os06t0116933-00)
LOC_Os06g25010	Os06g0356800	3.47293	chr06	14646987	14648089	Similar to Xylanase inhibitor protein I precursor. (Os06t0356800-01)
LOC_Os06g03670	Os06g0127100	3.78857	chr06	1434770	1435533	Dehydration-responsive element binding protein 1C, Chilling tolerance, Positive regulation of heat tolerance, Positive regulation of salt tolerance (Os06t0127100-01)
LOC_Os06g45184	Os06g0662550	4.01635	chr06	27319482	27322589	Conserved hypothetical protein. (Os06t0662550-01)
LOC_Os06g35960	Os06g0553100	4.58516	chr06	20998086	20998850	Similar to Heat stress transcription factor C-2b. (Os06t0553100-01)
LOC_Os06g19630	Os06g0300500	5.26292	chr06	11200132	11203938	Steroid nuclear receptor, ligand-binding domain containing protein. (Os06t0300500-01)
LOC_Os06g21910	Os06g0324400	6.02977	chr06	12665605	12666203	Late embryogenesis abundant (LEA) group 1 family protein. (Os06t0324400-01)
LOC_Os06g23350	Os06g0341300	6.18161	chr06	13630101	13631408	Seed maturation protein domain containing protein. (Os06t0341300-01)
LOC_Os06g46740	Os06g0681200	7.95041	chr06	28388375	28389574	Cupredoxin domain containing protein. (Os06t0681200-01)
LOC_Os07g43810	Os07g0631900	1.02976	chr07	26211749	26213842	Nucleotide-binding, alpha-beta plait domain containing protein. (Os07t0631900-01);Non-protein coding transcript. (Os07t0631900-02)
LOC_Os07g42834	Os07g0620600	1.05666	chr07	25652012	25653741	Conserved hypothetical protein. (Os07t0620600-01)
LOC_Os07g26110	Os07g0442900	1.11757	chr07	14988874	14990789	Uncharacterised protein family UPF0497, trans-membrane plant subgroup domain containing protein. (Os07t0442900-01)
LOC_Os07g44910	Os07g0643700	1.29358	chr07	26796193	26797512	Alpha/beta hydrolase fold-3 domain containing protein. (Os07t0643700-01)
LOC_Os07g40630	Os07g0597200	1.41211	chr07	24347899	24351836	Protein kinase, core domain containing protein. (Os07t0597200-01);Protein kinase, core domain containing protein. (Os07t0597200-02)
LOC_Os07g40290	Os07g0592600	1.44012	chr07	24149718	24152074	Indole-3-acetic acid (IAA)-amido synthetase, Auxin signaling and defense signaling in a pathogen-nonspecific manner (Os07t0592600-01)
LOC_Os07g35300	Os07g0537400	1.56915	chr07	21131097	21132528	Similar to receptor-like serine-threonine protein kinase. (Os07t0537400-01)
LOC_Os07g07790	Os07g0174400	1.63026	chr07	3910661	3911056	Similar to Non-specific lipid-transfer protein. (Os07t0174400-00)
LOC_Os07g42160	Os07g0613000	1.64331	chr07	25225861	25229459	Guanosine-tetraphosphate (ppGpp) synthase, RelA/SpoT Homolog 3b (Os07t0613000-01)
LOC_Os07g14150	Os07g0245100	1.733	chr07	8075642	8078200	Similar to Cytosine deaminase (EC 3.5.4.1). (Os07t0245100-01);Similar to cDNA clone:J023115F20, full insert sequence. (Os07t0245100-02)
LOC_Os07g22730	Os07g0410300	1.79886	chr07	12826360	12827317	Conserved hypothetical protein. (Os07t0410300-01)
LOC_Os07g04560	Os07g0138200	1.84685	chr07	2023158	2025061	NAC transcription factor, ABA-induced leaf senescence and tillering (Os07t0138200-01)
LOC_Os07g01340	Os07g0103500	1.9374	chr07	213778	219543	2OG-Fe(II) oxygenase domain containing protein. (Os07t0103500-01)
LOC_Os07g41320	Os07g0604400	1.94384	chr07	24755706	24758207	Similar to COBRA-like protein 6. (Os07t0604400-00)
LOC_Os07g09420	Os07g0192000	1.95833	chr07	4969408	4971145	ATPase, AAA-type, core domain containing protein. (Os07t0192000-01)
LOC_Os07g38130	Os07g0568700	2.05333	chr07	22874257	22875705	Polygalacturonase-inhibiting protein, Inhibitor of fungal polygalacturonase, Regulation of floral organ number (Os07t0568700-02)
LOC_Os07g47670	Os07g0673900	2.11485	chr07	28484263	28485201	Hypoxia induced protein, Early stage of hypoxia signalling (Os07t0673900-01)
LOC_Os07g34280	Os07g0526600	2.26156	chr07	20523736	20525356	Alpha/beta hydrolase fold-3 domain containing protein. (Os07t0526600-01)
LOC_Os07g37210	Os07g0558100	2.6322	chr07	22293736	22295309	Similar to Myb-related transcription factor LBM1. (Os07t0558100-00)
LOC_Os07g43240	Os07g0625400	2.71014	chr07	25904766	25905608	SKP1 component domain containing protein. (Os07t0625400-01)
LOC_Os07g44440	Os07g0638400	2.84968	chr07	26551676	26552939	1 Cys-peroxiredoxin B, Root development (Os07t0638400-01)
LOC_Os07g46950	Os07g0664600	3.04276	chr07	28061378	28063141	Glucose/ribitol dehydrogenase family protein. (Os07t0664600-01);Similar to predicted protein. (Os07t0664600-02)
LOC_Os07g44850	Os07g0643000	3.72127	chr07	26780049	26781207	Alpha/beta hydrolase fold-3 domain containing protein. (Os07t0643000-01)
LOC_Os07g23660	Os07g0418700	3.83774	chr07	13366416	13367503	Proline-rich glycoprotein, ABA-dependent inhibition of root growth (Os07t0418700-01)
LOC_Os07g37620	Os07g0563400	4.18842	chr07	22543447	22544955	Protein of unknown function DUF761, plant family protein. (Os07t0563400-01)
LOC_Os07g23640	Os07g0418600	4.861	chr07	13354235	13355291	Proline-rich glycoprotein, ABA-dependent inhibition of root growth (Os07t0418600-01)
LOC_Os07g34520	Os07g0529000	5.03498	chr07	20691213	20693521	Similar to Isocitrate lyase (Fragment). (Os07t0529000-01)
LOC_Os07g05940	Os07g0154100	6.02233	chr07	2870686	2872829	Similar to Viviparous-14. (Os07t0154100-01)
LOC_Os07g27370	None	1.09594	#N/A	#N/A	#N/A	#N/A
LOC_Os04g19114	None	1.17245	#N/A	#N/A	#N/A	#N/A
LOC_Os02g15560	None	1.23453	#N/A	#N/A	#N/A	#N/A
LOC_Os02g52540	None	1.29065	#N/A	#N/A	#N/A	#N/A
LOC_Os07g25970	None	1.39056	#N/A	#N/A	#N/A	#N/A
LOC_Os02g20960	None	1.51755	#N/A	#N/A	#N/A	#N/A
LOC_Os02g05550	None	1.60785	#N/A	#N/A	#N/A	#N/A
LOC_Os06g17070	None	1.74143	#N/A	#N/A	#N/A	#N/A
LOC_Os07g31530	None	1.74618	#N/A	#N/A	#N/A	#N/A
LOC_Os01g39136	None	1.74691	#N/A	#N/A	#N/A	#N/A
LOC_Os04g20290	None	1.7748	#N/A	#N/A	#N/A	#N/A
LOC_Os04g27810	None	1.78347	#N/A	#N/A	#N/A	#N/A
LOC_Os03g02874	None	2.20894	#N/A	#N/A	#N/A	#N/A
LOC_Os07g26320	None	2.34981	#N/A	#N/A	#N/A	#N/A
LOC_Os01g37200	None	2.62046	#N/A	#N/A	#N/A	#N/A
LOC_Os07g25960	None	2.62647	#N/A	#N/A	#N/A	#N/A
LOC_Os06g37140	None	2.81311	#N/A	#N/A	#N/A	#N/A
LOC_Os01g47300	None	2.98322	#N/A	#N/A	#N/A	#N/A
LOC_Os07g47010	None	3.37241	#N/A	#N/A	#N/A	#N/A
LOC_Os02g26280	None	3.88189	#N/A	#N/A	#N/A	#N/A
LOC_Os07g27390	None	4.23222	#N/A	#N/A	#N/A	#N/A
LOC_Os01g72270	None	6.19299	#N/A	#N/A	#N/A	#N/A
LOC_Os02g49340	None	NA	#N/A	#N/A	#N/A	#N/A
				Downregulated genes
LOC_Os01g20720	Os01g0308300	-1.04662	chr01	11526651	11529893	NB-ARC domain containing protein. (Os01t0308300-00)
LOC_Os01g47820	Os01g0668600	-1.13146	chr01	27375122	27377698	S-Domain receptor like kinase-12, Response to B. glumae in resistant rice genotype CL 161 (Os01t0668600-00)
LOC_Os01g17170	Os01g0279100	-1.1409	chr01	9874379	9876678	Subunit of magnesium-protoporphyrin IX monomethyl ester cyclase (EC:1.14.13.81), Core component of FLU-YGL8-LCAA-POR complex, Chlorophyll biosynthesis, Chloroplast development (Os01t0279100-01);Similar to Magnesium-protoporphyrin ix monomethyl ester cyclase (Fragment). (Os01t0279100-02)
LOC_Os01g26210	Os01g0364400	-1.14517	chr01	14856256	14878542	Protein kinase, catalytic domain domain containing protein. (Os01t0364400-00)
LOC_Os01g59750	Os01g0813000	-1.15281	chr01	34560768	34564315	Similar to 14 kDa zinc-binding protein. (Os01t0813000-01)
LOC_Os01g66250	Os01g0885700	-1.15997	chr01	38481235	38484005	S-Domain receptor like kinase-17, Response to drought and chilling stress in tolerant rice genotypes (Os01t0885700-01)
LOC_Os01g41430	Os01g0597800	-1.21802	chr01	23456074	23458035	UDP-glucuronosyl/UDP-glucosyltransferase family protein. (Os01t0597800-01)
LOC_Os01g58960	Os01g0803800	-1.24477	chr01	34084757	34086514	Cytochrome P450 of the CYP94 subfamily (Os01t0803800-01)
LOC_Os01g61880	Os01g0835500	-1.28853	chr01	35813149	35817706	Similar to Respiratory burst oxidase protein. (Os01t0835500-01);Similar to respiratory burst oxidase protein A. (Os01t0835500-02);Similar to Respiratory burst oxidase-like protein J. (Os01t0835500-03)
LOC_Os01g16450	Os01g0270300	-1.28864	chr01	9339815	9342240	Similar to Cationic peroxidase isozyme 40K precursor. (Os01t0270300-01);Similar to Cationic peroxidase isozyme 40K precursor. (Os01t0270300-02)
LOC_Os01g64310	Os01g0862800	-1.31379	chr01	37334397	37336207	NAC (NAM ATAF1/2 CUC2) transcription factor, Early and transient regulator of abiotic stress responses (Os01t0862800-01)
LOC_Os01g06220	Os01g0155000	-1.32782	chr01	2957166	2958439	Alpha/beta hydrolase fold-3 domain containing protein. (Os01t0155000-02)
LOC_Os01g06310	Os01g0155800	-1.32782	chr01	2999576	3001139	Conserved hypothetical protein. (Os01t0155800-01)
LOC_Os01g22640	Os01g0329900	-1.37749	chr01	12734098	12738081	Similar to Lipase homolog (Fragment). (Os01t0329900-01);Hypothetical conserved gene. (Os01t0329900-02)
LOC_Os01g44970	Os01g0636500	-1.38778	chr01	25513947	25518078	Similar to Polygalacturonase PG2. (Os01t0636500-01)
LOC_Os01g26300	Os01g0365000	-1.40325	chr01	14903885	14915751	Protein kinase, catalytic domain domain containing protein. (Os01t0365000-00)
LOC_Os01g67120	Os01g0896500	-1.44307	chr01	38961459	38966130	Rhodanese-like domain containing protein. (Os01t0896500-01);Similar to predicted protein. (Os01t0896500-02)
LOC_Os01g62200	Os01g0839200	-1.45042	chr01	36002559	36005000	DUF966 family protein, Abiotic stress response (Os01t0839200-01)
LOC_Os01g47780	Os01g0668100	-1.45475	chr01	27340911	27341950	Similar to Arabinogalactan-like protein. (Os01t0668100-01)
LOC_Os01g57410	Os01g0783100	-1.46331	chr01	33182589	33186141	Pentatricopeptide repeat domain containing protein. (Os01t0783100-01)
LOC_Os01g08840	Os01g0183900	-1.61026	chr01	4440901	4441368
LOC_Os01g50080	Os01g0695700	-1.61585	chr01	28768976	28780102	Similar to MDR-like ABC transporter. (Os01t0695700-00)
LOC_Os01g02000	Os01g0110100	-1.63754	chr01	537710	543354	Phosphate (Pi) transporter, Pi homeostasis (Os01t0110100-01)
LOC_Os01g22570	Os01g0329000	-1.64503	chr01	12677044	12683455	Phospholipid/glycerol acyltransferase domain containing protein. (Os01t0329000-01)
LOC_Os01g12130	Os01g0220700	-1.64964	chr01	6612386	6613717	Similar to predicted protein. (Os01t0220700-00)
LOC_Os01g65880	Os01g0881300	-1.73443	chr01	38254053	38257595	Non-protein coding transcript. (Os01t0881300-01);MtN3 and saliva related transmembrane protein family protein. (Os01t0881300-02)
LOC_Os01g52070	Os01g0718700	-1.79515	chr01	29944091	29948109	Similar to predicted protein. (Os01t0718700-00)
LOC_Os01g24090	Os01g0343500	-1.81013	chr01	13582038	13584915	Similar to TPR repeat. (Os01t0343500-01)
LOC_Os01g67360	Os01g0899200	-2.00622	chr01	39102277	39103501	Similar to dehydration-responsive family protein. (Os01t0899200-01)
LOC_Os01g19480	Os01g0300900	-2.07092	chr01	11058878	11063872	Galactose oxidase/kelch, beta-propeller domain containing protein. (Os01t0300900-01);Hypothetical conserved gene. (Os01t0300900-02)
LOC_Os01g65260	Os01g0873100	-2.07546	chr01	37866113	37866722	Similar to Amidophosphoribosyltransferase, chloroplast precursor (EC 2.4.2.14) (Glutamine phosphoribosylpyrophosphate amidotransferase) (ATASE) (GPAT). (Os01t0873100-01)
LOC_Os01g31690	Os01g0501800	-2.10046	chr01	17349338	17350785	Similar to Photosystem II oxygen-evolving complex protein 1 (Fragment). (Os01t0501800-01)
LOC_Os01g45274	Os01g0639900	-2.32934	chr01	25696671	25705077	beta-carbonic anhydrase (EC:4.2.1.1), Carbon assimilation, CO<sub>2</sub>-mediated stomatal pore response (Os01t0639900-01)
LOC_Os01g54270	Os01g0746400	-2.33006	chr01	31225458	31228566	Carotenoid cleavage dioxygenase 8, Control of lateral bud outgrowth, Regulation of tillering, Strigolactones biosynthesis (Os01t0746400-01)
LOC_Os01g69070	Os01g0919800	-2.33411	chr01	40136226	40142760	Similar to Efflux carrier of polar auxin transport. (Os01t0919800-01)
LOC_Os01g41710	Os01g0600900	-2.36913	chr01	23607363	23608541	Chlorophyll a-b binding protein 2, chloroplast precursor (LHCII type I CAB-2) (LHCP). (Os01t0600900-02);Similar to Chlorophyll a-b binding protein 2, chloroplastic. (Os01t0600900-03)
LOC_Os01g02080	Os01g0111100	-2.42862	chr01	586445	587696	Cyclophilin-like domain containing protein. (Os01t0111100-01)
LOC_Os01g01120	Os01g0101200	-2.45996	chr01	62060	65537	2,3-diketo-5-methylthio-1-phosphopentane phosphatase domain containing protein. (Os01t0101200-01);2,3-diketo-5-methylthio-1-phosphopentane phosphatase domain containing protein. (Os01t0101200-02)
LOC_Os01g02780	Os01g0117200	-2.46765	chr01	969340	973327	Similar to ARK protein (Fragment). (Os01t0117200-01)
LOC_Os01g49430	Os01g0688900	-2.69728	chr01	28425816	28427634	Similar to HSP70B (heat shock protein 70B); ATP binding. (Os01t0688900-00)
LOC_Os01g70730	Os01g0933500	-2.83824	chr01	40942545	40942986	Similar to FLP1. (Os01t0933500-00)
LOC_Os01g13120	Os01g0232000	-2.9602	chr01	7297781	7298619	Major intrinsic protein family protein. (Os01t0232000-00)
LOC_Os01g74160	Os01g0973100	-2.96329	chr01	42960110	42964990	Hypothetical conserved gene. (Os01t0973100-01)
LOC_Os01g42790	Os01g0613800	-3.0274	chr01	24351308	24353345	Peptidase C1A, papain family protein. (Os01t0613800-01)
LOC_Os01g63870	Os01g0857500	-3.14503	chr01	37062340	37064615	Xanthine/uracil/vitamin C permease family protein. (Os01t0857500-01)
LOC_Os01g47370	Os01g0663051	-3.65475	chr01	27062505	27064276	Similar to SANT/MYB protein. (Os01t0663051-00)
LOC_Os01g74300	Os01g0974200	-4.54675	chr01	43047164	43047861	Metallothionein, Distribution of Zn to grain (Os01t0974200-01);RicMT (Metallothionein-like protein). (Os01t0974200-02);Conserved hypothetical protein. (Os01t0974200-03)
LOC_Os01g52160	Os01g0719600	-5.61621	chr01	30003535	30005888	Heavy metal transport/detoxification protein domain containing protein. (Os01t0719600-01)
LOC_Os02g45450	Os02g0677300	-1.08939	chr02	27652935	27654206	Typical CBF/DREB1 transcription factor, Dehydration-responsive element binding protein 1G, Cold stress tolerance, Positive regulation of heat, salt and drought tolerance (Os02t0677300-02)
LOC_Os02g06360	Os02g0158300	-1.10803	chr02	3179485	3182746	Sugar isomerase (SIS) domain containing protein. (Os02t0158300-01)
LOC_Os02g42430	Os02g0636600	-1.12747	chr02	25523466	25524380	GRAM domain containing protein. (Os02t0636600-00)
LOC_Os02g32610	Os02g0527600	-1.14918	chr02	19324219	19332130	Functional homolog of Arabidopsis Raf-like protein CONSTITUTIVE TRIPLE RESPONSE1 (CTR1), Ethylene-receptor signalling (Os02t0527600-01)
LOC_Os02g52930	Os02g0768300	-1.19035	chr02	32359193	32361902	Protein of unknown function DUF6, transmembrane domain containing protein. (Os02t0768300-01)
LOC_Os02g33550	Os02g0538700	-1.19416	chr02	19954579	19955654	Harpin-induced 1 domain containing protein. (Os02t0538700-01);Harpin-induced 1 domain containing protein. (Os02t0538700-02)
LOC_Os02g47420	Os02g0702600	-1.20714	chr02	28953036	28958936	Rop nucleotide exchanger, PRONE domain containing protein. (Os02t0702600-01);Rop nucleotide exchanger, PRONE domain containing protein. (Os02t0702600-02);Similar to predicted protein. (Os02t0702600-03)
LOC_Os02g15660	Os02g0255700	-1.38185	chr02	8810104	8820960	Conserved hypothetical protein. (Os02t0255700-01);Hypothetical conserved gene. (Os02t0255700-02)
LOC_Os02g36210	Os02g0571100	-1.4315	chr02	21841092	21847545	Ent-copalyl diphosphate synthase, Defense against both fungal pathogen and bacterial pathogen, Biosynthesis of phytoalexin (Os02t0571100-01)
LOC_Os02g02930	Os02g0121700	-1.47205	chr02	1145837	1151052	Terpenoid synthase domain containing protein. (Os02t0121700-01)
LOC_Os02g17000	Os02g0270200	-1.58926	chr02	9712632	9715959	Similar to Subtilase. (Os02t0270200-01)
LOC_Os02g36030	Os02g0569000	-1.63495	chr02	21662608	21664276	Cytochrome P450 family protein. (Os02t0569000-01)
LOC_Os02g43970	Os02g0657000	-1.64609	chr02	26550965	26552002	DREB-like protein, AP2/EREBP-type transcription factor, Drought tolerance, Seed germination, Response to abiotic stress (Os02t0657000-01)
LOC_Os02g55870	Os02g0802200	-1.65779	chr02	34199541	34203704	Glycoside hydrolase family 79, N-terminal protein. (Os02t0802200-01)
LOC_Os02g47020	Os02g0698000	-1.73681	chr02	28701864	28704291	Similar to Phosphoribulokinase, chloroplast precursor (EC 2.7.1.19) (Phosphopentokinase) (PRKase) (PRK). (Os02t0698000-01);Similar to Phosphoribulokinase, chloroplast precursor (EC 2.7.1.19) (Phosphopentokinase) (PRKase) (PRK). (Os02t0698000-02);Similar to Phosphoribulokinase, chloroplast precursor (EC 2.7.1.19) (Phosphopentokinase) (PRKase) (PRK). (Os02t0698000-03)
LOC_Os02g48200	Os02g0712600	-1.77731	chr02	29515727	29518756	Concanavalin A-like lectin/glucanase domain containing protein. (Os02t0712600-01)
LOC_Os02g37770	Os02g0590200	-2.01954	chr02	22789881	22791737	Lecithin:cholesterol/phospholipid:diacylglycerol acyltransferase domain containing protein. (Os02t0590200-01)
LOC_Os02g40240	Os02g0615800	-2.06943	chr02	24350730	24354486	Protein kinase, core domain containing protein. (Os02t0615800-01);Hypothetical conserved gene. (Os02t0615800-02)
LOC_Os02g17710	Os02g0277700	-2.13948	chr02	10213163	10216340	Leucine-rich repeat domain containing protein. (Os02t0277700-01)
LOC_Os02g46100	Os02g0686100	-2.28167	chr02	28096979	28098029	E3 ubiquitin ligase, Regulation of tolerance to cold stress (Os02t0686100-01)
LOC_Os02g21810	Os02g0323600	-2.35694	chr02	12970223	12972230	Similar to Cytochrome P450-like protein. (Os02t0323600-01)
LOC_Os02g02000	Os02g0110200	-2.3729	chr02	554579	556320	Fatty acid 13-hydroperoxide lyase (CYP74B), Plant defense (Os02t0110200-01);Similar to Hydroperoxide lyase. (Os02t0110200-02)
LOC_Os02g32780	Os02g0529900	-2.4179	chr02	19466313	19469350	Pentatricopeptide repeat domain containing protein. (Os02t0529900-01)
LOC_Os02g37760	Os02g0590000	-2.51102	chr02	22782750	22783121	Lecithin:cholesterol/phospholipid:diacylglycerol acyltransferase domain containing protein. (Os02t0590000-00)
LOC_Os02g53850	Os02g0779000	-2.77455	chr02	32981274	32983228	Peptidase S8/S53, subtilisin/kexin/sedolisin domain containing protein. (Os02t0779000-00)
LOC_Os02g53130	Os02g0770800	-3.49434	chr02	32513749	32517155	NADH/NADPH-dependent nitrate reductase (Os02t0770800-01)
LOC_Os03g24590	Os03g0360600	-1.13155	chr03	14006157	14007356	Mitochodrial transcription termination factor-related family protein. (Os03t0360600-00)
LOC_Os03g15340	Os03g0259100	-1.21789	chr03	8396569	8397410	Similar to Basic blue protein (Cusacyanin) (Plantacyanin) (CBP). (Os03t0259100-01)
LOC_Os03g02690	Os03g0118600	-1.23965	chr03	1004328	1007269	Similar to Dihydrodipicolinate reductase-like protein. (Os03t0118600-01);Similar to dihydrodipicolinate reductase. (Os03t0118600-02)
LOC_Os03g45800	Os03g0660200	-1.24784	chr03	25866208	25866564
LOC_Os03g39610	Os03g0592500	-1.29009	chr03	22000043	22001240	Similar to Photosystem II type II chlorophyll a/b binding protein (Fragment). (Os03t0592500-01);Similar to Chloroplast chlorophyll a-b binding protein (Fragment). (Os03t0592500-02)
LOC_Os03g03790	Os03g0130100	-1.31279	chr03	1706053	1708135	Similar to Acyl-activating enzyme 11. (Os03t0130100-01)
LOC_Os03g12660	Os03g0227700	-1.36837	chr03	6737549	6744486	Cytochrome P450 90B2, Brassinosteroid C-22 hydroxylase, Brassinosteroids biosynthesis (Os03t0227700-01)
LOC_Os03g47280	Os03g0676400	-1.43948	chr03	26752033	26752699	VQ domain containing protein. (Os03t0676400-01)
LOC_Os03g56950	Os03g0782500	-1.5283	chr03	32432551	32435839	Phytochrome-interacting factor-like bHLH protein, Stress-responsive transcription factor, Regulator of reduced internode elongation under drought conditions (Os03t0782500-01)
LOC_Os03g11110	Os03g0209500	-1.53523	chr03	5710240	5715009	Zinc finger, DHHC-type domain containing protein. (Os03t0209500-01)
LOC_Os03g59240	Os03g0807100	-1.5424	chr03	33731566	33734958	Protein of unknown function DUF239 domain containing protein. (Os03t0807100-01)
LOC_Os03g57149	Os03g0785200	-1.66379	chr03	32590198	32591451	Mitochodrial transcription termination factor-related family protein. (Os03t0785200-01)
LOC_Os03g36530	Os03g0563100	-1.73543	chr03	20240367	20243969	D-arabinono-1,4-lactone oxidase domain containing protein. (Os03t0563100-01)
LOC_Os03g30420	Os03g0417700	-1.78035	chr03	17340417	17342284	Similar to Phytochrome P450. (Os03t0417700-01);Cytochrome P450 paralogue, Promotion of grain growth (Os03t0417700-02)
LOC_Os03g61040	Os03g0825600	-1.78271	chr03	34674979	34676923	Hypothetical conserved gene. (Os03t0825600-01);Conserved hypothetical protein. (Os03t0825600-02)
LOC_Os03g20700	Os03g0323200	-1.79334	chr03	11712280	11719587	Similar to Magnesium-chelatase subunit H family protein, expressed. (Os03t0323200-01);Similar to Magnesium-chelatase subunit H family protein, expressed. (Os03t0323200-02);Similar to Magnesium-chelatase subunit H family protein, expressed. (Os03t0323200-03);Magnesium chelatase subunit ChlH, Chlorophyll biosynthesis (Os03t0323200-04)
LOC_Os03g56930	Os03g0782200	-1.93058	chr03	32423241	32424487	Hypothetical protein. (Os03t0782200-01)
LOC_Os03g24160	Os03g0356582	-1.99085	chr03	13712274	13716745	Phosphatidylinositol-4-phosphate 5-kinase, core domain containing protein. (Os03t0356582-01)
LOC_Os03g22634	Os03g0348200	-2.33665	chr03	13063312	13070842	Terpene synthase-like domain containing protein. (Os03t0348200-00)
LOC_Os03g19990	Os03g0314500	-2.63332	chr03	11266821	11270098	WD40-like Beta Propeller domain containing protein. (Os03t0314500-01);Hypothetical conserved gene. (Os03t0314500-02)
LOC_Os03g03600	Os03g0128000	-2.73832	chr03	1579382	1580910	FAS1 domain domain containing protein. (Os03t0128000-01);Similar to Fasciclin-like protein FLA2. (Os03t0128000-02)
LOC_Os03g02190	Os03g0113000	-2.78607	chr03	732488	734247	Serine/threonine protein kinase domain containing protein. (Os03t0113000-01);Serine/threonine protein kinase domain containing protein. (Os03t0113000-02)
LOC_Os03g45450	Os03g0657400	-2.97517	chr03	25651039	25651556	Hypothetical conserved gene. (Os03t0657400-00)
LOC_Os03g11160	Os03g0210000	-2.98268	chr03	5749954	5750298	Putative cysteine proteinase inhibitor 9. (Os03t0210000-00)
LOC_Os04g30250	Os04g0371000	-1.04938	chr04	18056917	18057576	Four-helical cytokine family protein. (Os04t0371000-00)
LOC_Os04g43290	Os04g0512300	-1.06781	chr04	25608241	25611089	Arp2/3 complex, 34kDa subunit p34-Arc family protein. (Os04t0512300-01)
LOC_Os04g44330	Os04g0524900	-1.15737	chr04	26253821	26256781	Similar to OSIGBa0153E02-OSIGBa0093I20.16 protein. (Os04t0524900-00)
LOC_Os04g58200	Os04g0678700	-1.17601	chr04	34663055	34664559	NADPH:protochlorophyllide oxidoreductase, Chlorophyll biosynthesis (Os04t0678700-01)
LOC_Os04g48350	Os04g0572400	-1.27766	chr04	28820116	28821919	Dehydration-responsive element binding protein 1E, Chilling tolerance, Positive regulation of heat tolerance (Os04t0572400-01)
LOC_Os04g01470	Os04g0104900	-1.41722	chr04	316562	319162	Similar to 0-methyltransferase (EC 2.1.1.6) (Fragment). (Os04t0104900-01)
LOC_Os04g36720	Os04g0444800	-1.46398	chr04	22182599	22186919	Ferric reductase oxidase, Fe homeostasis, Salt stress response (Os04t0444800-01);Ferric reductase-like transmembrane component family protein. (Os04t0444800-02)
LOC_Os04g30030	Os04g0369000,Os04g0369066	-1.4799	chr04	17913242	17914650	PapD-like domain containing protein. (Os04t0369000-01)
LOC_Os04g56240	Os04g0657500	-1.52193	chr04	33530289	33533734	Lipase, class 3 family protein. (Os04t0657500-01)
LOC_Os04g37770	Os04g0450701	-1.5634	chr04	22452038	22452591	Hypothetical protein. (Os04t0450701-00)
LOC_Os04g28990	Os04g0359100	-1.56486	chr04	17180207	17183428	Alcohol dehydrogenase superfamily, zinc-containing protein. (Os04t0359100-01)
LOC_Os04g02850	Os04g0118700	-1.56772	chr04	1110678	1113347	Pentatricopeptide repeat domain containing protein. (Os04t0118700-00)
LOC_Os04g43400	Os04g0513700	-1.65401	chr04	25672306	25674971	Similar to Beta-glucosidase 16. (Os04t0513700-00)
LOC_Os04g49920	Os04g0588900	-1.73713	chr04	29770168	29773429
LOC_Os04g21350	Os04g0282400	-1.76489	chr04	12062977	12063828	Homologue of Arabidopsis flowering-promoting factor 1, AtFPF1, Modulation of root and flower development, Control of auxin accumulation, Modulation of ROS homeostasis (Os04t0282400-01)
LOC_Os04g15920	Os04g0229100	-1.78022	chr04	8637314	8639345	Similar to Sinapyl alcohol dehydrogenase. (Os04t0229100-01)
LOC_Os04g33830	Os04g0414700	-1.86627	chr04	20496054	20497009	Photosystem I PsaO domain containing protein. (Os04t0414700-01)
LOC_Os04g44220	Os04g0523200,Os04g0523350	-1.9388	chr04	26177249	26179831	Up-frameshift suppressor 2 domain containing protein. (Os04t0523200-01)
LOC_Os04g33660	Os04g0412500	-2.11196	chr04	20388100	20390005	Similar to OSIGBa0134P10.2 protein. (Os04t0412500-01)
LOC_Os04g38600	Os04g0459500	-2.1271	chr04	22937162	22939010	Similar to H0219H12.1 protein. (Os04t0459500-01);Similar to GADPH (383 AA) (Fragment). (Os04t0459500-02)
LOC_Os04g11970	Os04g0196200	-2.12804	chr04	6564647	6566873	Acetyl-serotonin methyltransferase, Melatonin biosynthesis (Os04t0196200-01)
LOC_Os04g38410	Os04g0457000	-2.58749	chr04	22835913	22837163	Similar to Chlorophyll a/b-binding protein CP24, photosystem II (Fragment). (Os04t0457000-01)
LOC_Os04g29960	Os04g0368000	-3.21843	chr04	17874313	17877280	Serine/threonine protein kinase-related domain containing protein. (Os04t0368000-01)
LOC_Os04g37520	Os04g0448000	-3.49206	chr04	22335579	22337098	Similar to OSIGBa0152K17.7 protein. (Os04t0448000-00)
LOC_Os04g29680	Os04g0366000	-3.77712	chr04	17667431	17671131	Similar to OSIGBa0110B10.6 protein. (Os04t0366000-00)
LOC_Os04g29580	Os04g0365100	-4.19043	chr04	17584989	17589580	Similar to OSIGBa0135K14.8 protein. (Os04t0365100-01)
LOC_Os04g48930	Os04g0578600	-4.5037	chr04	29178862	29181665	Similar to H0404F02.15 protein. (Os04t0578600-01);Ferric reductase oxidase, Iron homeostasis, "Drought, heat, salinity stress response" (Os04t0578600-02)
LOC_Os05g11650	Os05g0206600	-1.03692	chr05	6606005	6606262	Non-protein coding transcript. (Os05t0206600-00)
LOC_Os05g03120	Os05g0122600	-1.06147	chr05	1240299	1245253	Prefoldin domain containing protein. (Os05t0122600-01);Similar to Rid2 protein (Fragment). (Os05t0122600-02)
LOC_Os05g12640	Os05g0217800	-1.10753	chr05	7255510	7257163	BURP domain containing protein. (Os05t0217800-01);Similar to BURP domain-containing protein 2. (Os05t0217800-02)
LOC_Os05g06920	Os05g0161500	-1.2294	chr05	3626394	3629080	Calcium-activated (p)ppGpp synthetase, Ca<sup>2+</sup>-activated RelA-SpoT homolog 2 (Os05t0161500-01)
LOC_Os05g46610	Os05g0543600	-1.31062	chr05	26987460	26989035	R2R3-type MYB transcription factor, Regulation of the development of secondary cell wall (Os05t0543600-01)
LOC_Os05g49320	Os05g0568300	-1.39608	chr05	28299369	28300093	Similar to 50S ribosomal protein L12, chloroplast precursor (CL12). (Os05t0568300-00)
LOC_Os05g02550	Os05g0116300	-1.4025	chr05	885036	886004
LOC_Os05g23830	Os05g0304000	-1.42642	chr05	13697790	13698128
LOC_Os05g22614	Os05g0291700	-1.59301	chr05	12833493	12839420	Similar to PTAC16 (PLASTID TRANSCRIPTIONALLY ACTIVE18); binding / catalytic. (Os05t0291700-01);Similar to cDNA clone:002-143-C11, full insert sequence. (Os05t0291700-02);NAD(P)-binding domain containing protein. (Os05t0291700-03)
LOC_Os05g34170	Os05g0413200	-1.61009	chr05	20204138	20207282	Beta-tubulin , Responseto gebberellin (GA) and brassinolide (BL) (Os05t0413200-01)
LOC_Os05g48270	Os05g0556400	-1.63574	chr05	27666328	27669347	DOMON related domain containing protein. (Os05t0556400-01)
LOC_Os05g48900	Os05g0563600	-1.64355	chr05	28051758	28052859	FAS1 domain domain containing protein. (Os05t0563600-01)
LOC_Os05g38790	Os05g0463300	-1.83468	chr05	22756240	22758478	Hypothetical conserved gene. (Os05t0463300-00)
LOC_Os05g27590	Os05g0342100	-2.19919	chr05	16058314	16059130	Wound-induced protein, Wun1 domain containing protein. (Os05t0342100-01)
LOC_Os05g30220	Os05g0365300	-2.81694	chr05	17512767	17517933	Nucleotide-binding site leucine-rich repeat (NBS-LRR) protein, Bacterial blight resistance (Os05t0365300-01);Similar to NBS-LRR-like protein (Fragment). (Os05t0365300-02)
LOC_Os05g25370	Os05g0317900	-3.50205	chr05	14725926	14735830	Catharanthus roseus receptor-like kinase1-like kinase, Regulation of flowering time signaling pathway and/or circadian rhythms (Os05t0317900-01)
LOC_Os05g50300	Os05g0579200	-3.51845	chr05	28829948	28832127	AMP-dependent synthetase and ligase domain containing protein. (Os05t0579200-01)
LOC_Os05g50340	Os05g0579600	-3.7821	chr05	28845110	28846124	Homeodomain-like containing protein. (Os05t0579600-01)
LOC_Os05g11210	Os05g0201700	-3.83829	chr05	6333107	6333718	Hypothetical conserved gene. (Os05t0201700-00)
LOC_Os06g24850	Os06g0355300	-1.00526	chr06	14577762	14580200	Similar to Auxin-responsive protein IAA22. (Os06t0355300-01)
LOC_Os06g12310	Os06g0228200	-1.01448	chr06	6648404	6653002	Aquaporin NIP III subfamily protein, Aquaporin, Silicon influx transporter, Water transport (Os06t0228200-01);Similar to NOD26-like membrane integral protein. (Os06t0228200-03)
LOC_Os06g12450	Os06g0229800	-1.12615	chr06	6748398	6753302	Soluble starch synthase II-3, Endosperm starch synthesis, Determination of the type of amylopectin structure of starch grain (Os06t0229800-01)
LOC_Os06g40170	Os06g0604200	-1.15914	chr06	23908918	23913796	Chloroplast-localized phospholipase D, Herbivore defense (Os06t0604200-02)
LOC_Os06g07790	Os06g0174800	-1.22625	chr06	3781226	3782897	Conserved hypothetical protein. (Os06t0174800-00)
LOC_Os06g32910	Os06g0520733	-1.29345	chr06	19157238	19158412	Similar to cell number regulator 4. (Os06t0520733-00)
LOC_Os06g08900	Os06g0188700	-1.33976	chr06	4481240	4487783	Similar to Glutamate receptor. (Os06t0188700-00)
LOC_Os06g10230	Os06g0203800	-1.35749	chr06	5244239	5251843	Receptor-like kinase, Heat tolerance (Os06t0203800-01)
LOC_Os06g35700	Os06g0549900	-1.36737	chr06	20832520	20834491	FAD linked oxidase, N-terminal domain containing protein. (Os06t0549900-01)
LOC_Os06g06250	Os06g0156600	-1.43439	chr06	2893694	2895804	Lipase, GDSL domain containing protein. (Os06t0156600-01)
LOC_Os06g19260	Os06g0296700	-1.49118	chr06	10957733	10960700	C-type lectin, conserved site domain containing protein. (Os06t0296700-01)
LOC_Os06g16640	Os06g0278000	-1.50352	chr06	9564356	9566944	Glucoamylase, putatuve domain containing protein. (Os06t0278000-00)
LOC_Os06g15330	Os06g0264200	-1.58377	chr06	8704831	8706949	CONSTANS-like protein, Transcription factor, Repression of flowering, Regulation of plant height and grain yield (Os06t0264200-01)
LOC_Os06g08120	Os06g0179500	-1.61663	chr06	3941687	3943447	Protein of unknown function DUF247, plant family protein. (Os06t0179500-00)
LOC_Os06g21570	Os06g0320200	-1.71608	chr06	12437683	12442790	Similar to OSIGBa0135C13.7 protein. (Os06t0320200-01);Glycosyl hydrolase family 1 (GH1) beta-glucosidase, Seed germination, Root elongation, Drought tolerance (Os06t0320200-02)
LOC_Os06g48560	Os06g0699100	-1.79995	chr06	29381137	29382336	Transferase domain containing protein. (Os06t0699100-00)
LOC_Os06g40940	Os06g0611900	-1.81979	chr06	24399546	24404035	Similar to Glycine decarboxylase P subunit. (Os06t0611900-01);Similar to Victorin binding protein. (Os06t0611900-02)
LOC_Os06g49750	Os06g0711700	-1.89556	chr06	30092166	30093523	Kelch-type beta propeller domain containing protein. (Os06t0711700-00)
LOC_Os06g51210	Os06g0727900	-2.18289	chr06	30982225	30988361	Domain of unknown function DUF23 domain containing protein. (Os06t0727900-00)
LOC_Os06g04920	Os06g0141200	-4.76067	chr06	2162738	2165150	Putative zinc finger protein, Negative regulation of salt stress response (Os06t0141200-01)
LOC_Os07g48980	Os07g0689600	-1.02453	chr07	29323098	29324607	Nicotianamine synthase 3, Mitigation of excess Fe stress, Fe detoxification, Transport of iron (Os07t0689600-01)
LOC_Os07g33440	Os07g0518100	-1.22926	chr07	19985763	19987668	Cytochrome P450 (CYP450) protein 716A subfamily, Positive regulation of the resistance response to rice sheath blight (RSB) and bacterial leaf blight (BLB) (Os07t0518100-01)
LOC_Os07g08350	Os07g0181100	-1.23315	chr07	4283646	4287282	C4-dicarboxylate transporter/malic acid transport protein family protein. (Os07t0181100-01)
LOC_Os07g02140	Os07g0112100	-1.64969	chr07	685467	687222	Similar to J023132I08, full insert sequence. (Os07t0112100-00)
LOC_Os07g48020	Os07g0677200	-1.78223	chr07	28673754	28675351	Peroxidase, Negative regulation of rice resistance to blast disease (Os07t0677200-01);Similar to Peroxidase. (Os07t0677200-02)
LOC_Os07g48010	Os07g0677100	-1.97027	chr07	28669498	28671384	Peroxidase. (Os07t0677100-01)
LOC_Os07g34830	Os07g0532500	-1.98302	chr07	20874271	20876723	Ankyrin repeat containing protein. (Os07t0532500-01);Hypothetical conserved gene. (Os07t0532500-02)
LOC_Os07g01620	Os07g0106900,Os07g0107100	-2.14365	chr07	383519	384235	Plant disease resistance response protein family protein. (Os07t0106900-01)
LOC_Os07g37240	Os07g0558400	-2.23107	chr07	22316343	22317935	Similar to Chlorophyll a/b-binding protein CP29 precursor. (Os07t0558400-01)
LOC_Os07g31960	Os07g0502900	-2.34048	chr07	19008024	19009668	UDP-glucuronosyl/UDP-glucosyltransferase family protein. (Os07t0502900-00)
LOC_Os07g34070	Os07g0524900	-2.5584	chr07	20365632	20367832	Protein of unknown function DUF6, transmembrane domain containing protein. (Os07t0524900-01)
LOC_Os07g11330	Os07g0213800	-3.24967	chr07	6244163	6244880	Similar to Allergenic protein. (Os07t0213800-01)
LOC_Os07g43560	Os07g0628700	-3.71308	chr07	26052222	26055831	Similar to Receptor protein kinase. (Os07t0628700-01)
LOC_Os08g34720	Os08g0447000	-1.00144	chr08	21818095	21823157	3-phosphoglycerate dehydrogenase 2, Serine biosynthesis (Os08t0447000-01)
LOC_Os08g36920	Os08g0474000	-1.10511	chr08	23353856	23354936	Similar to AP2 domain containing protein RAP2.6 (Fragment). (Os08t0474000-01)
LOC_Os08g03630	Os08g0130400	-1.12532	chr08	1716498	1719881	AMP-dependent synthetase/ligase domain containing protein. (Os08t0130400-01)
LOC_Os08g06280	Os08g0159500	-1.16835	chr08	3460765	3463758	C2C2-type zinc finger protein, Promotion of seed germination, Modulation of gibberellin biosynthesis, Regulation of cell death and callus differentiation (Os08t0159500-01);Similar to LOL1. (Os08t0159500-02)
LOC_Os08g28790	Os08g0375400	-1.25835	chr08	17613571	17614371	Plant disease resistance response protein family protein. (Os08t0375400-01)
LOC_Os08g41630	Os08g0528000,Os08g0528100	-1.41394	chr08	26287796	26291466	Peptidase C19, ubiquitin carboxyl-terminal hydrolase 2 family protein. (Os08t0528000-00)
LOC_Os08g07890	Os08g0176200	-1.56461	chr08	4445655	4447532	Serine/threonine protein kinase-related domain containing protein. (Os08t0176200-01)
LOC_Os08g35160	Os08g0452900	-1.72841	chr08	22159610	22161424	Similar to Chaperone protein dnaJ. (Os08t0452900-01)
LOC_Os08g01160	Os08g0101900	-2.02323	chr08	108447	109106	UPF0497 membrane protein 2. (Os08t0101900-00)
LOC_Os08g38400	Os08g0492000	-2.36542	chr08	24311145	24314816	Similar to Glutathione transporter. (Os08t0492000-01)
LOC_Os08g16580	Os08g0266400	-2.61019	chr08	10142326	10144699	Leucine-rich repeat, N-terminal domain containing protein. (Os08t0266400-00)
LOC_Os08g30590	Os08g0396500	-2.61896	chr08	18849616	18852819	Hypothetical conserved gene. (Os08t0396500-01)
LOC_Os08g28670	Os08g0374000	-2.89724	chr08	17510752	17511689	Bet v I allergen family protein. (Os08t0374000-01)
LOC_Os08g37940	Os08g0485900	-2.91499	chr08	24023544	24027173	Haloacid dehalogenase-like hydrolase domain containing protein. (Os08t0485900-01)
LOC_Os09g20880	Os09g0375600	-1.03069	chr09	12565503	12567065	Similar to Protein kinase family protein. (Os09t0375600-01)
LOC_Os09g32570	Os09g0502500	-1.0412	chr09	19443222	19444839	Alcohol dehydrogenase superfamily, zinc-containing protein. (Os09t0502500-01)
LOC_Os09g27510	Os09g0447500	-1.127	chr09	16718633	16720923	Cytochrome P450 family protein. (Os09t0447500-01)
LOC_Os09g30130	Os09g0478300	-1.2505	chr09	18316004	18322383	Similar to Cellulose synthase-like protein E6. (Os09t0478300-01)
LOC_Os09g27500	Os09g0447300	-1.31226	chr09	16711022	16713794	Cytochrome P450 family protein. (Os09t0447300-01)
LOC_Os09g19229	Os09g0356800	-1.72481	chr09	11483617	11506480	Protein kinase, core domain containing protein. (Os09t0356800-01)
LOC_Os09g19400	Os09g0358700	-1.74163	chr09	11611266	11616750	Carbohydrate-binding malectin-like domain-containing protein, Drought tolerance, NADPH oxidase-mediated ROS production (Os09t0358700-01)
LOC_Os09g03380	Os09g0121100	-1.86141	chr09	1659226	1659549
LOC_Os09g31502	Os09g0491820	-1.87301	chr09	19011720	19014197	NAD(P)-binding domain containing protein. (Os09t0491820-01);Similar to dihydroflavonol-4-reductase. (Os09t0491820-02)
LOC_Os09g25060	Os09g0417600	-2.19407	chr09	14976197	14977729	WRKY transcription factor, Transcriptional repressor, Pathogen defense, Alkali tolerance at the germination stage (Os09t0417600-01);WRKY transcription factor 76. (Os09t0417600-02);Splicing variant of OsWRKY76, Pathogen defense (Os09t0417600-03);Splicing variant of OsWRKY76, Pathogen defense (Os09t0417600-04)
LOC_Os09g29540	Os09g0471500	-2.20175	chr09	17968402	17971304	Conserved hypothetical protein. (Os09t0471500-01)
LOC_Os09g27890	Os09g0452200	-2.3765	chr09	16958544	16962140	Lysin motif-containing protein, Pattern recognition receptor, Peptidoglycan and chitin perception in innate immunity (Os09t0452200-01);Similar to LysM-domain GPI-anchored protein 1 precursor. Splice isoform 2. (Os09t0452200-02)
LOC_Os09g35010	Os09g0522000	-2.46532	chr09	20395279	20396175	Transcription activator, "Tolerance to drought, high-salt and cold stresses" (Os09t0522000-01)
LOC_Os09g35020	Os09g0522100	-3.1633	chr09	20399458	20400198	Similar to Dehydration-responsive element-binding protein 1H. (Os09t0522100-00)
LOC_Os09g39050	Os09g0563950	-3.51102	chr09	22418846	22420093	Cyclin-like F-box domain containing protein. (Os09t0563950-00)
LOC_Os09g35940	Os09g0528700	-3.78792	chr09	20691369	20693116	Similar to Cytochrome p450 (CYP78A9). (Os09t0528700-00)
LOC_Os10g35840	Os10g0502400	-1.00193	chr10	19159179	19162398	Glutamyl-tRNA reductase, Rice homolog of Arabidopsis GluTR (Os10t0502400-01);Similar to Glutamyl-tRNA reductase. (Os10t0502400-02)
LOC_Os10g35950	Os10g0503300	-1.64584	chr10	19214959	19215235	Similar to 10-deacetylbaccatin III 10-O-acetyltransferase. (Os10t0503300-00)
LOC_Os10g10180	Os10g0181600	-1.65012	chr10	5592943	5595558	Methyltransferase type 11 domain containing protein. (Os10t0181600-01);Similar to CMV 1a interacting protein 1. (Os10t0181600-02)
LOC_Os10g26500	Os10g0404900	-1.8191	chr10	13804909	13806731	Similar to HAHB-5 (Fragment). (Os10t0404900-01)
LOC_Os10g04730	Os10g0136500	-1.83296	chr10	2257492	2262619	GnK2 domain containing receptor-like kinase-8, Response to chilling stress in tolerant rice genotype Volano, Response to Xanthomonas oryzae pv. oryzae in resistant rice genotype IRBB21 (Os10t0136500-01)
LOC_Os10g35030	Os10g0492300	-1.88494	chr10	18687994	18693376	Similar to IAP100. (Os10t0492300-01)
LOC_Os10g38540	Os10g0528900	-1.89066	chr10	20574829	20576053	Similar to Tau class GST protein 3. (Os10t0528900-01)
LOC_Os10g01044	Os10g0100300	-1.90264	chr10	46031	58278	NAD(P)-binding domain containing protein. (Os10t0100300-01)
LOC_Os10g36500	Os10g0508700	-2.14826	chr10	19530118	19532281	Pectinesterase inhibitor domain containing protein. (Os10t0508700-01)
LOC_Os10g05490	Os10g0144700	-2.23392	chr10	2709163	2711992	Cytochrome P450 domain containing protein. (Os10t0144700-00)
LOC_Os10g38800	Os10g0531700	-2.32166	chr10	20652467	20654875	Serine/threonine protein kinase-related domain containing protein. (Os10t0531700-00)
LOC_Os10g40810	Os10g0557600	-3.61697	chr10	21943291	21945186	GATA transcription factor, Brassinosteroids-mediated growth regulation, panicle development and grain shape/number/weight/yield (Os10t0557600-01)
LOC_Os10g40520	Os10g0552700	-4.4354	chr10	21693876	21694502	Similar to Tumor-related protein (Fragment). (Os10t0552700-01)
LOC_Os11g46000	Os11g0687200	-1.021	chr11	27841513	27846793	Hypothetical conserved gene. (Os11t0687200-01);von Willebrand factor, type A domain containing protein. (Os11t0687200-02);Hypothetical conserved gene. (Os11t0687200-03)
LOC_Os11g05010	Os11g0147500	-1.02235	chr11	2168334	2171145	Heavy metal transport/detoxification protein domain containing protein. (Os11t0147500-01);Heavy metal transport/detoxification protein domain containing protein. (Os11t0147500-02)
LOC_Os11g43590	Os11g0657000	-1.02783	chr11	26299857	26305695	Kelch repeat type 2 domain containing protein. (Os11t0657000-01)
LOC_Os11g47240	Os11g0695000	-1.06258	chr11	28407554	28411141	Leucine-rich-repeat receptor kinase EXS precursor, Xa26 homolog, Bacterial blight (BB) resistance (Os11t0695000-01)
LOC_Os11g01240	Os11g0103400	-1.08484	chr11	136630	139200	Similar to IBR domain containing protein. (Os11t0103400-00)
LOC_Os11g11330	Os11g0220300	-1.17822	chr11	6285765	6287989	Similar to NB-ARC domain containing protein, expressed. (Os11t0220300-01)
LOC_Os11g31530	Os11g0514400	-1.22989	chr11	18426136	18428231	Small leucine rich repeat (LRR) protein, Cell elongation activity, Regulation of lamina inclination and grain size (Os11t0514400-01)
LOC_Os11g07020	Os11g0171300	-1.41945	chr11	3488768	3491609	Fructose-bisphosphate aldolase, chloroplast precursor (EC 4.1.2.13) (ALDP). (Os11t0171300-01)
LOC_Os11g13890	Os11g0242800	-1.49212	chr11	7659701	7662180	Light-harvesting complex II protein, Light-dependent rice blast resistance (Os11t0242800-01)
LOC_Os11g10290	Os11g0208800	-1.83906	chr11	5586534	5589198	Similar to Receptor-like protein kinase. (Os11t0208800-01)
LOC_Os11g16550	Os11g0267000	-1.91956	chr11	9177329	9178565	Regulator of the Magnesium-chelatase subunit ChlH activity, Activation of the ChlH subunit of magnesium chelatase, Chlorophyll synthesis (Os11t0267000-02);GUN4-like domain containing protein. (Os11t0267000-03)
LOC_Os11g43420	Os11g0655300	-2.07964	chr11	26217692	26220753	NB-ARC domain containing protein. (Os11t0655300-01)
LOC_Os11g46810	Os11g0690600,Os11g0690733	-2.69414	chr11	28091241	28091624
LOC_Os11g02540	Os11g0117600	-2.88892	chr11	793116	795608	WRKY transcription factor 50, Transcription repressor, Mediation of ABA-dependent seed germination and seedling growth, Salt stress tolerance (Os11t0117600-01)
LOC_Os11g47210	Os11g0694850	-3.2967	chr11	28399360	28402773	Leucine-rich repeat (LRR) receptor kinase-like protein, Bacterial blight resistance (Os11t0694850-01)
LOC_Os11g08020	Os11g0182900	-4.32474	chr11	4168279	4170029	Ankyrin repeat domain containing protein. (Os11t0182900-00)
LOC_Os11g36000	Os11g0567800	-6.40922	chr11	21156776	21159062	Leucine-rich repeat-containing N-terminal, type 2 domain containing protein. (Os11t0567800-01)
LOC_Os12g37840	Os12g0566000	-1.1484	chr12	23248824	23253304	Similar to Boron transporter. (Os12t0566000-01);Boron (B) transporter, Boron uptake and xylem loading (Os12t0566000-02);Similar to Boron transporter. (Os12t0566000-03)
LOC_Os12g36870	Os12g0555400	-1.28479	chr12	22597827	22598994	Similar to Raffinose synthase protein. (Os12t0555400-01)
LOC_Os12g08760	Os12g0189300	-1.53784	chr12	4499739	4503902	Pyruvate/Phosphoenolpyruvate kinase, catalytic core domain containing protein. (Os12t0189300-01);Non-protein coding transcript. (Os12t0189300-02)
LOC_Os12g27254	Os12g0458100	-1.54351	chr12	15998272	16005479	Transferase family protein. (Os12t0458100-01)
LOC_Os12g02060	Os12g0111800	-1.58733	chr12	614314	616031	Similar to Class III peroxidase 136. (Os12t0111800-00)
LOC_Os12g02470	Os12g0116800	-1.82718	chr12	836516	838755	WRKY transcription factor, Bacterial blight disease resistance, Bakanae disease resistance (Os12t0116800-01)
LOC_Os12g24320	Os12g0431100	-2.07776	chr12	13879364	13881474	ATPase, AAA-type, core domain containing protein. (Os12t0431100-01)
LOC_Os12g09720	Os12g0199000	-3.27285	chr12	5132646	5135246	Similar to Jasmonate-induced protein. (Os12t0199000-00)
LOC_Os07g19140	None	-1.00639
LOC_Os05g37050	None	-1.19966
LOC_Os04g39360	None	-1.27384
LOC_Os04g14260	None	-1.28595
LOC_Os01g26240	Os01g0364400	-1.30513
LOC_Os06g32900	None	-1.33439
LOC_Os11g12310	None	-1.42784
LOC_Os07g11100	None	-1.64933
LOC_Os04g14280	None	-1.66237
LOC_Os05g43340	None	-1.69575
LOC_Os07g28000	None	-1.70174
LOC_Os09g19300	None	-1.71876
LOC_Os09g19290	None	-1.73177
LOC_Os05g28120	None	-1.76671
LOC_Os04g29800	None	-1.76677
LOC_Os10g37700	None	-1.79542
LOC_Os11g35960	None	-1.81929
LOC_Os06g32890	None	-1.85921
LOC_Os03g18060	None	-1.93575
LOC_Os05g24520	None	-1.94495
LOC_Os04g11195	None	-1.96785
LOC_Os10g05120	None	-1.97684
LOC_Os08g05010	None	-2.02916
LOC_Os12g16520	None	-2.03111
LOC_Os04g39370	None	-2.10827
LOC_Os06g15630	None	-2.12498
LOC_Os11g47220	None	-2.27353
LOC_Os06g40930	None	-2.28255
LOC_Os09g19390	None	-2.32036
LOC_Os09g37958	None	-2.44194
LOC_Os09g19380	None	-2.49135
LOC_Os11g47000	None	-2.74558
LOC_Os04g29790	None	-2.76286
LOC_Os12g12390	None	-2.96608
LOC_Os02g49340	None	-4.09497
